# Supplementary material for: Comparative Proteomics of Inner Membrane Fraction from Carbapenem-Resistant Acinetobacter baumannii with a Reference Strain
Source: PubMed Central journal article supplement (PMC3383706; doi:10.1371/journal.pone.0039451), 2012-06-26
Supplement: pone.0039451.s003.pdf [file pone.0039451.s003.pdf]

**A** Identifier 213

**B** Position (286, 203)

Notes

 Anova p-value  $\leq 0.05$

 Fold > 2

 up in 307

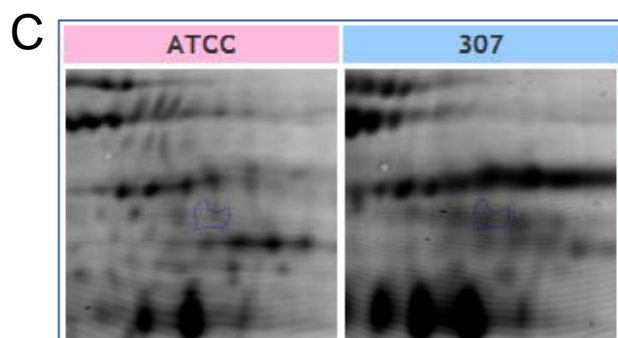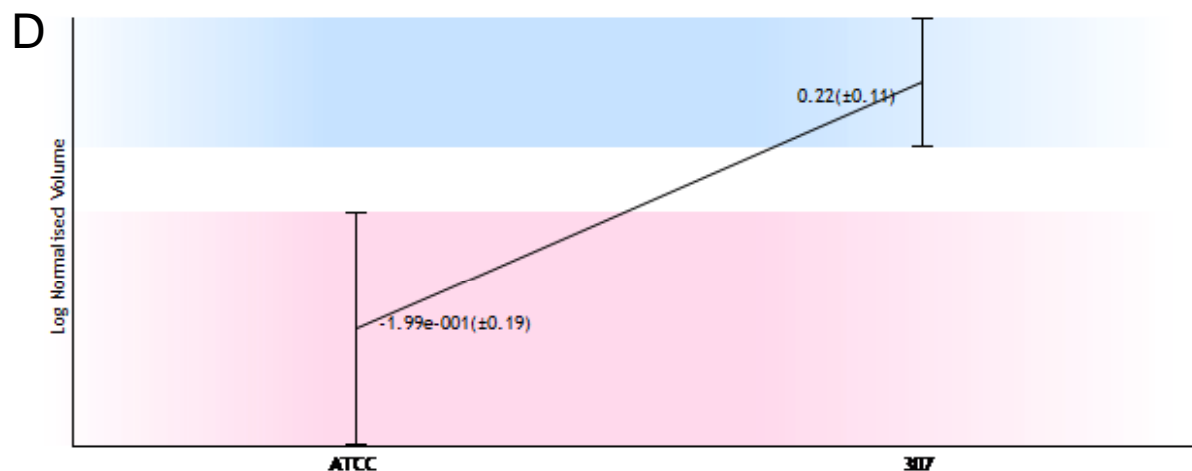

**Figure S3.1** Representation of comparative Progenesis gel analysis of normalized gel image of native strain ATCC with high resistant strain RS 307 using Progenesis software. All the combined results are displayed for upregulated master spot no. 213 in Progenesis of master gel which is same as that of master number 490 in decyder. Panel A shows the master spot number in the gel. Panel B represents position, statistical measurement and fold change of the spot. Panel C shows location of spot in the gel. Pane D shows log normalized volume for same spot.

Identifier 417

Position (135, 388)

Notes

- Anova p-value  $\leq 0.05$
- Fold $>2$
- up in 307

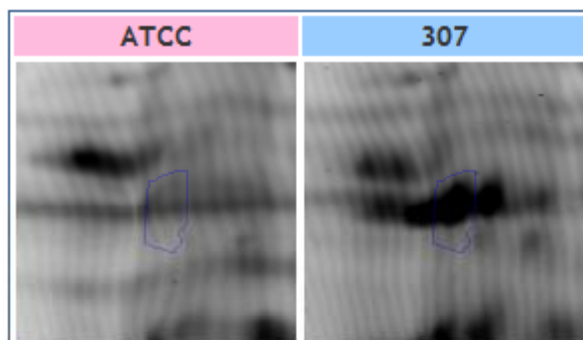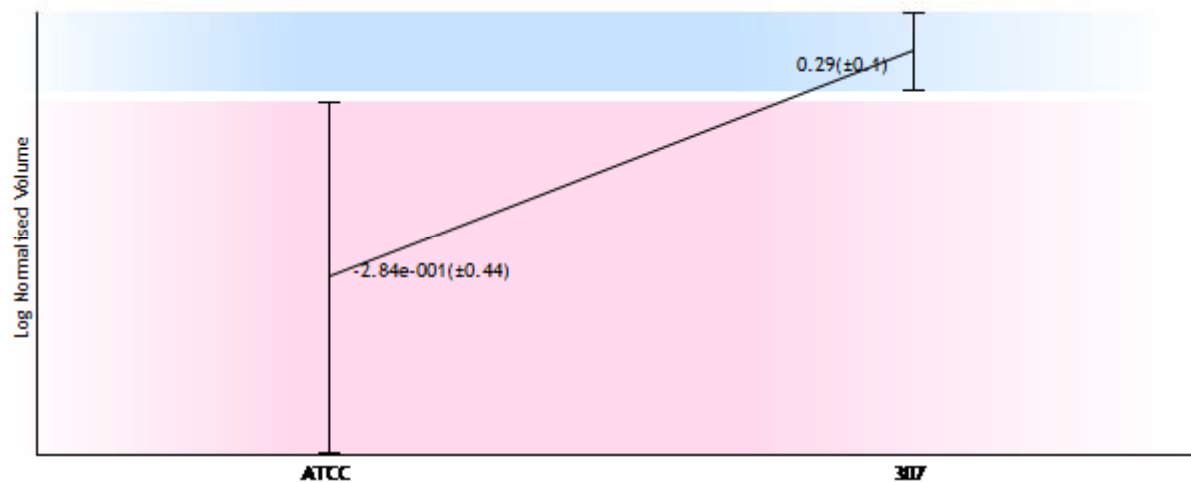

Figure S3.2. Representation of comparative Progenesis gel analysis of normalized gel image of native strain ATCC with high resistant strain RS 307 using Progenesis software. All the combined results are displayed for upregulated master spot no.417 in Progenesis of master gel which is same as that of master number 904 in decyder

Identifier 416

Position (120, 388)

Notes

- Anova p-value  $\leq 0.05$
- Fold $>2$
- up in 307

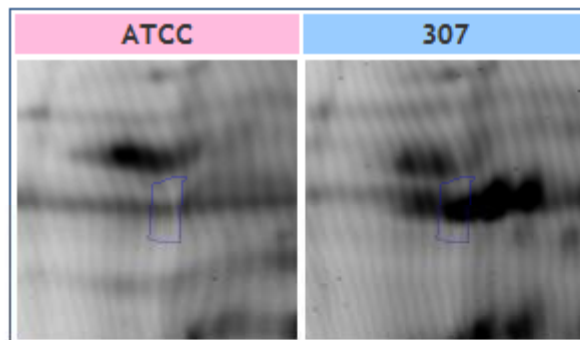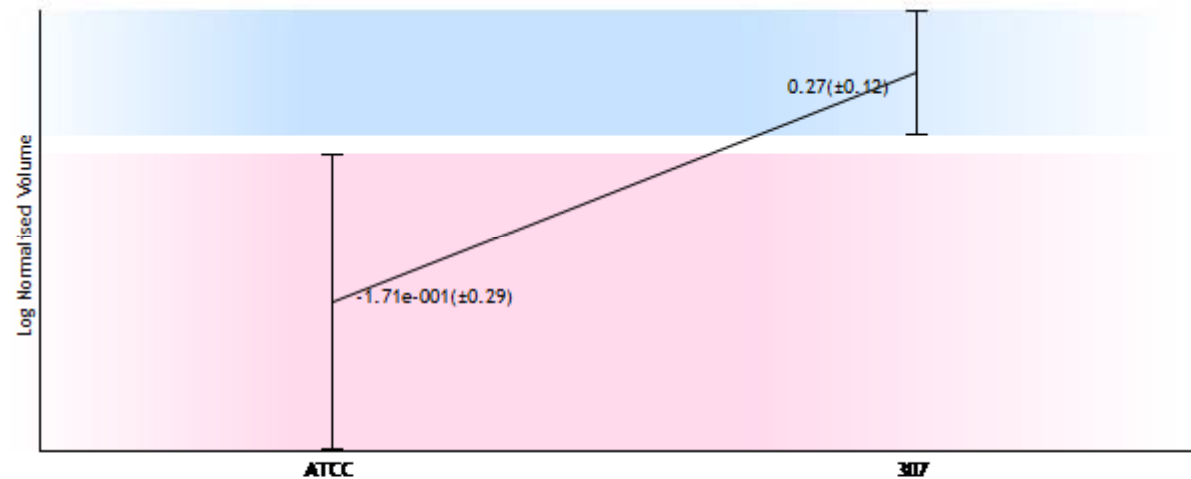

Figure S3.3 Representation of comparative Progenesis gel analysis of normalized gel image of native strain ATCC with high resistant strain RS 307 using Progenesis software. All the combined results are displayed for upregulated master spot no 416 in Progenesis of master gel which is same as that of master number 902 in decydr.

## Identifier 267

Position (585, 250)

### Notes

- Anova p-value  $\leq 0.05$
- Fold $>2$
- up in 307

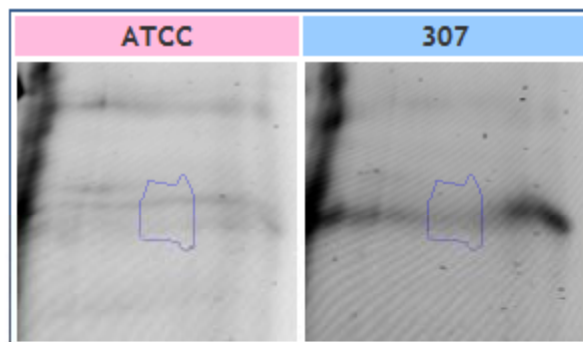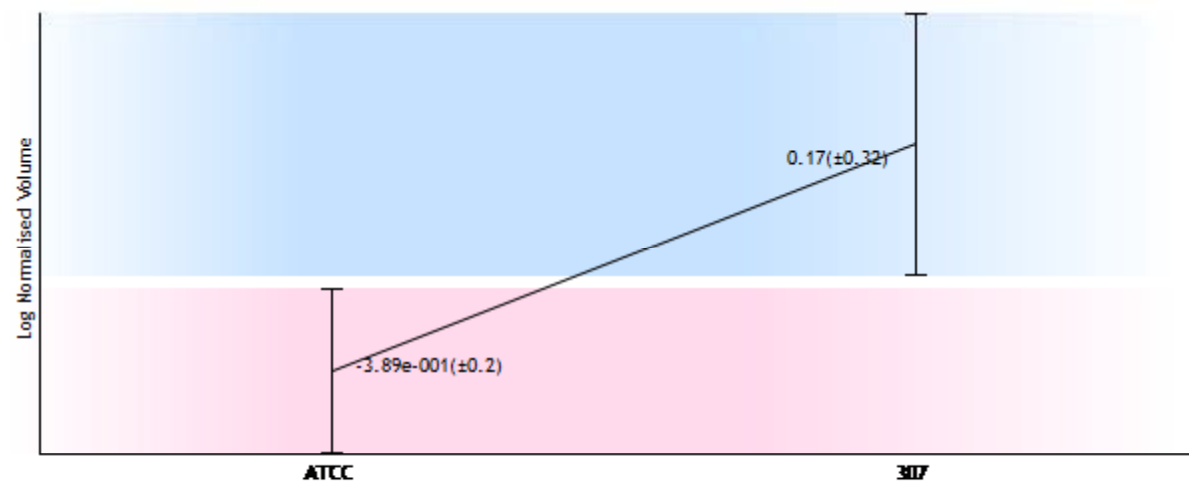

**Figure S3.4** Representation of comparative Progenesis gel analysis of normalized gel image of native strain ATCC with high resistant strain RS 307 using Progenesis software. All the combined results are displayed for upregulated master spot no 267 in Progenesis of master gel which is same as that of master number 603 in decyder.

## Identifier 187

Position (220, 189)

### Notes

- Anova p-value  $\leq 0.05$
- Fold > 2
- up in 307

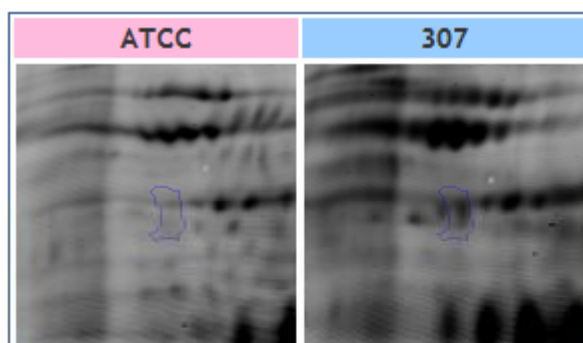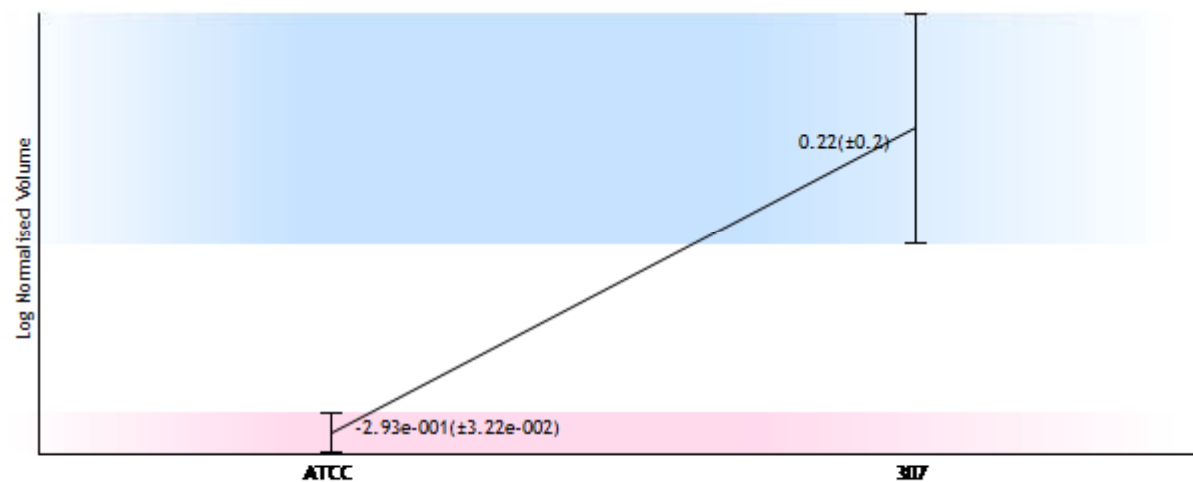

**Figure S3.5** Representation of comparative Progenesis gel analysis of normalized gel image of native strain ATCC with high resistant strain RS 307 using Progenesis software. All the combined results are displayed for upregulated master spot no 187 in Progenesis of master gel which is same as that of master number 455 in decyder.

## Identifier 265

Position (251, 250)

### Notes

- Anova p-value  $\leq 0.05$
- Fold > 2
- up in 307

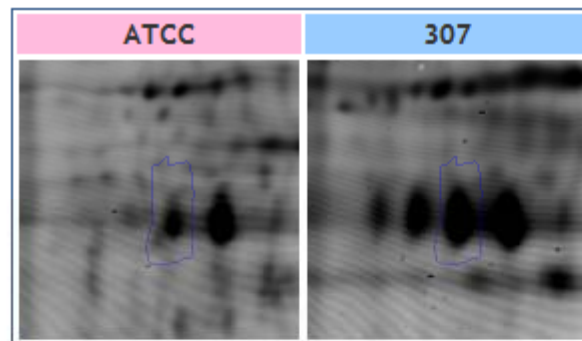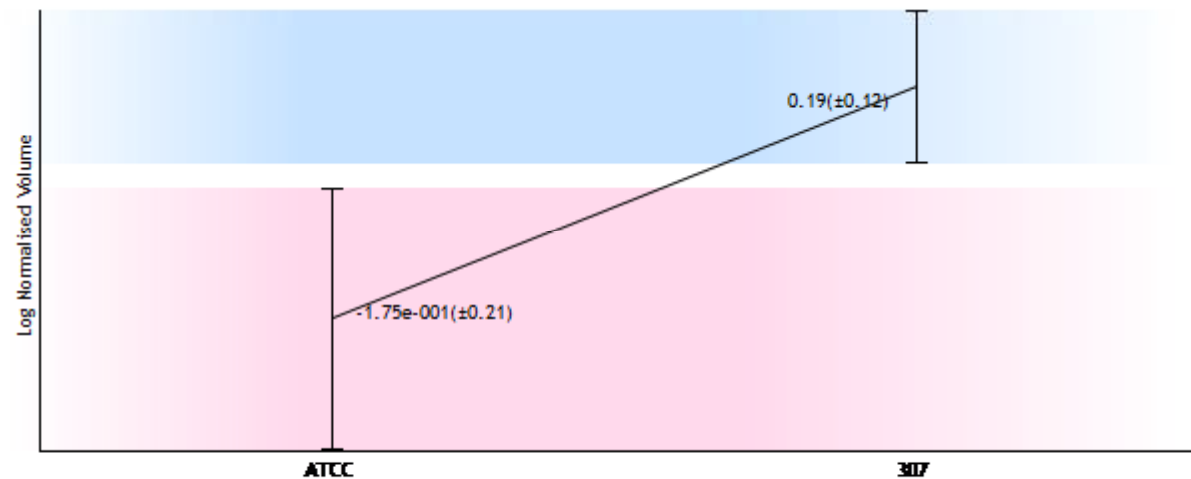

**Figure S3.6** Representation of comparative Progenesis gel analysis of normalized gel image of native strain ATCC with high resistant strain RS 307 using Progenesis software. All the combined results are displayed for upregulated master spot no 265 in Progenesis of master gel which is same as that of master number 595 in decyder.

Identifier 173

Position (398, 178)

Notes

- Anova p-value  $\leq 0.05$
- Fold > 2
- up in 307

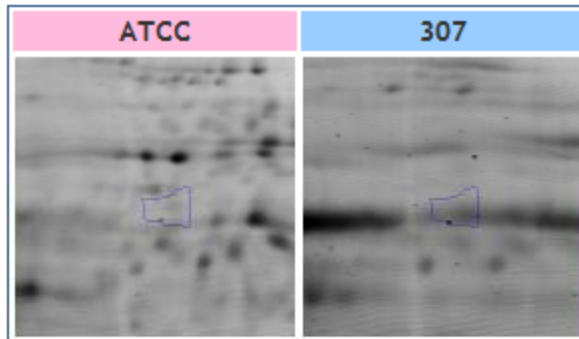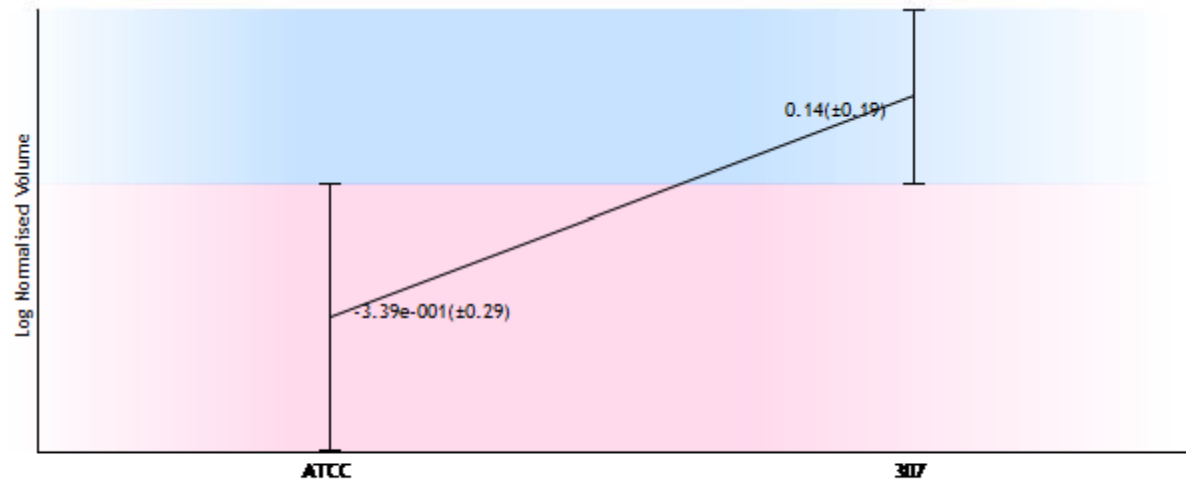

Figure S3.7 Representation of comparative Progenesis gel analysis of normalized gel image of native strain ATCC with high resistant strain RS 307 using Progenesis software. All the combined results are displayed for upregulated master spot no 173 in Progenesis of master gel which is same as that of master number 428 in decyder.

## Identifier 212

Position (268, 203)

### Notes

- Anova p-value  $\leq 0.05$
- Fold  $> 2$
- up in 307

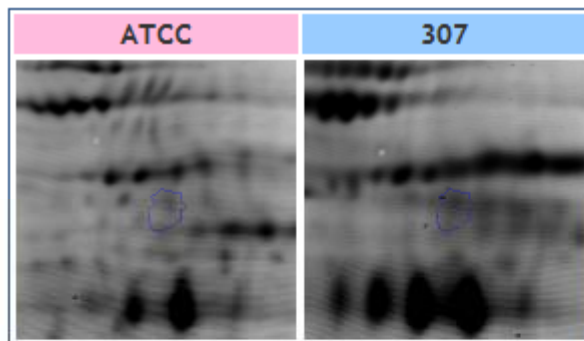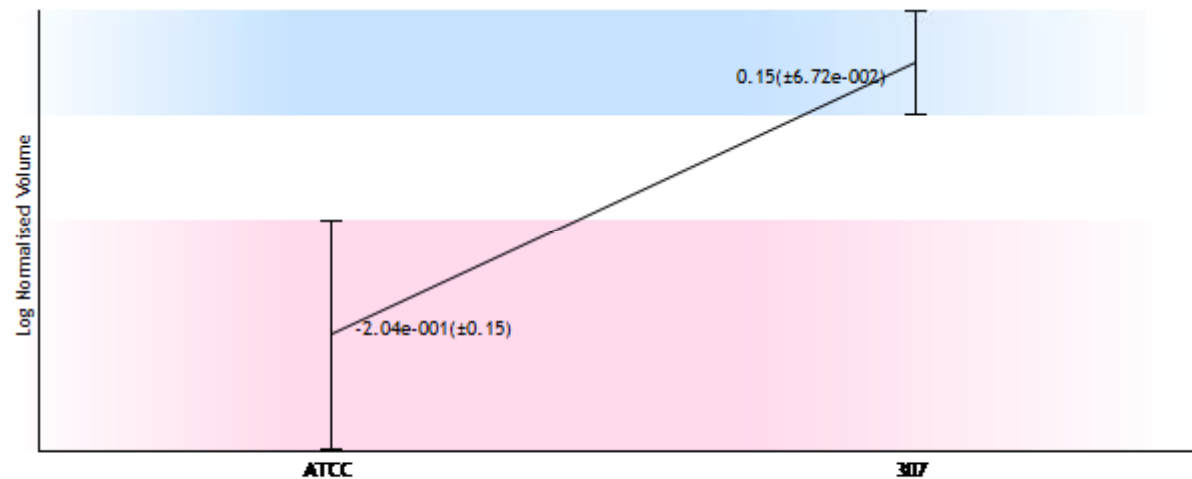

**Figure S3.8** Representation of comparative Progenesis gel analysis of normalized gel image of native strain ATCC with high resistant strain RS 307 using Progenesis software. All the combined results are displayed for upregulated master spot no 212 in Progenesis of master gel which is same as that of master number 489 in decyder.



## Identifier 178

Position (324, 182)

### Notes

- Anova p-value  $\leq 0.05$
- Fold > 2
- up in 307

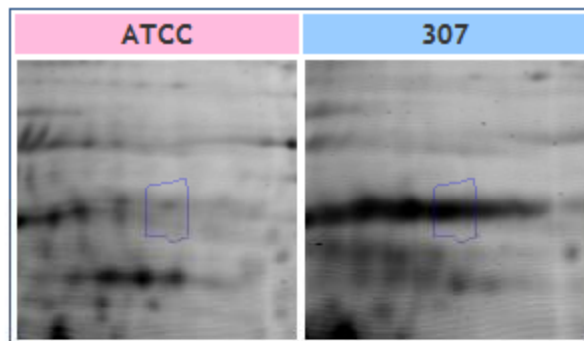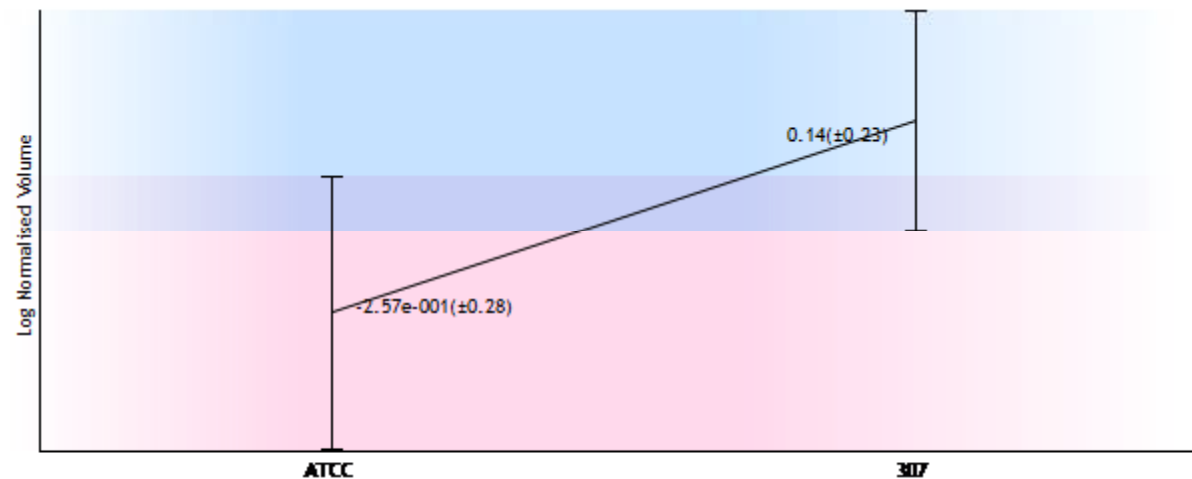

**Figure S3.9** Representation of comparative Progenesis gel analysis of normalized gel image of native strain ATCC with high resistant strain RS 307 using Progenesis software. All the combined results are displayed for upregulated master spot no. 178 in Progenesis of master gel which is same as that of master number 436 in decyder.

## Identifier 158

Position (209, 157)

### Notes

- Anova p-value  $\leq 0.05$
- Fold > 2
- up in 307

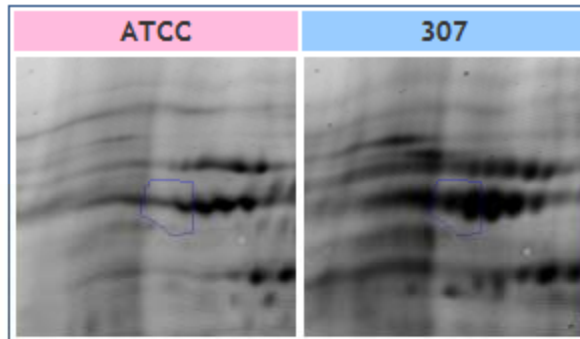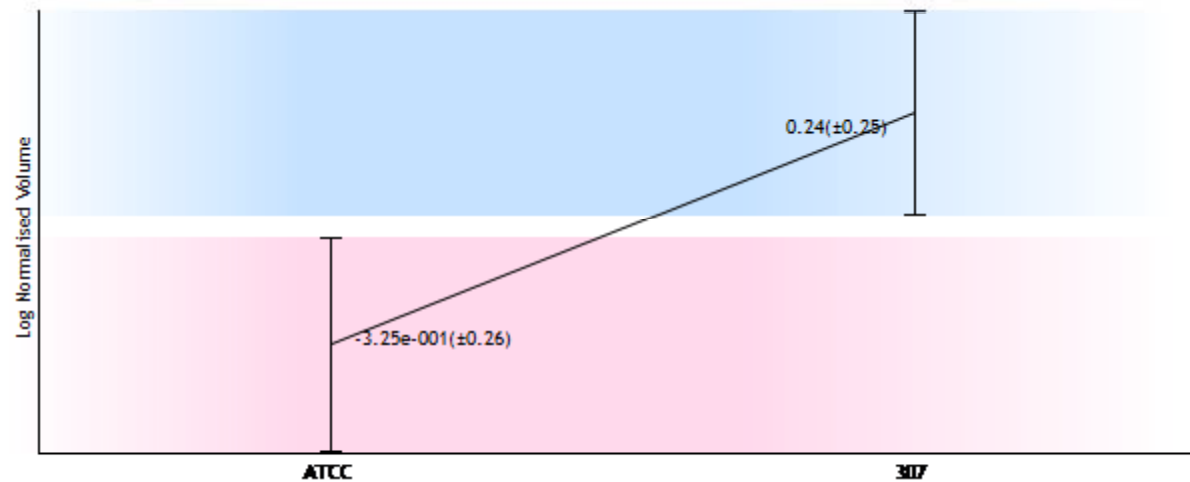

**Figure S3.10** Representation of comparative Progenesis gel analysis of normalized gel image of native strain ATCC with high resistant strain RS 307 using Progenesis software. All the combined results are displayed for upregulated master spot no. 158 in Progenesis of master gel which is same as that of master number 365 in decydr.

## Identifier 153

Position (228, 156)

### Notes

- Anova p-value  $\leq 0.05$
- Fold  $> 2$
- up in 307

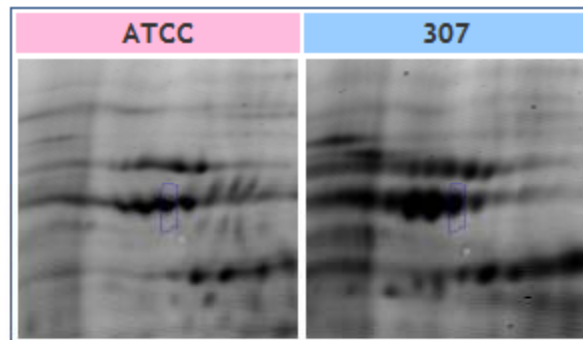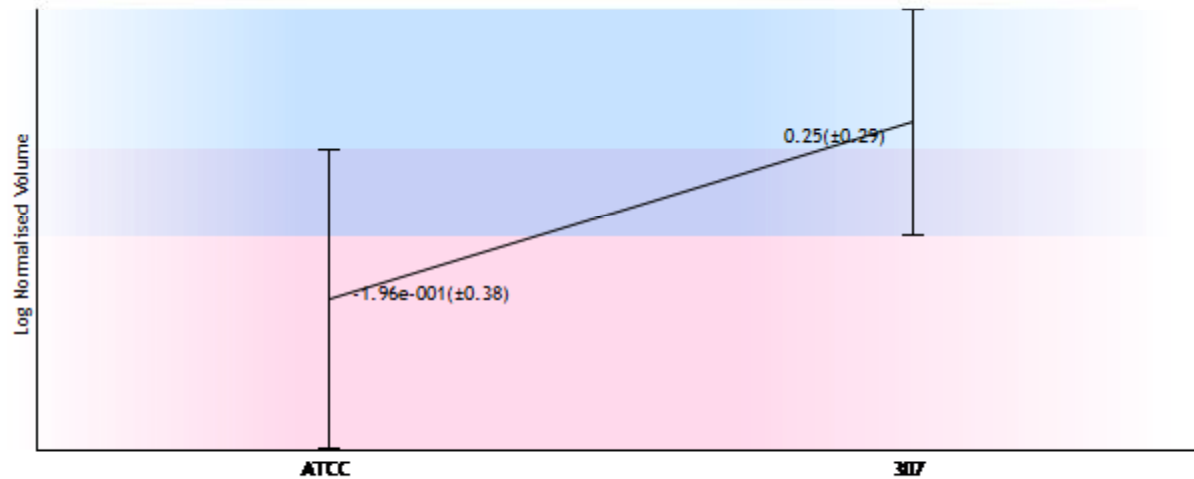

**Figure S3.11** Representation of comparative Progenesis gel analysis of normalized gel image of native strain ATCC with high resistant strain RS 307 using Progenesis software. All the combined results are displayed for upregulated master spot no. 153 in Progenesis of master gel which is same as that of master number 366 in decydr.

## Identifier 107

Position (188, 132)

### Notes

- Anova p-value  $\leq 0.05$
- Fold > 2
- up in 307

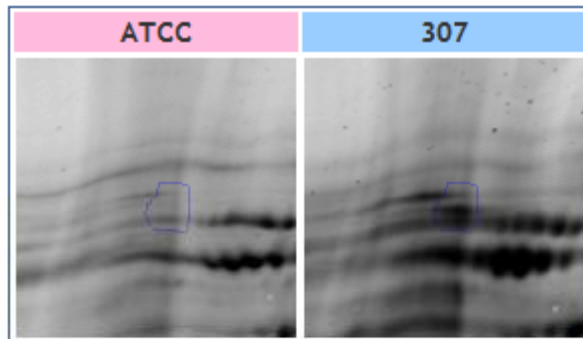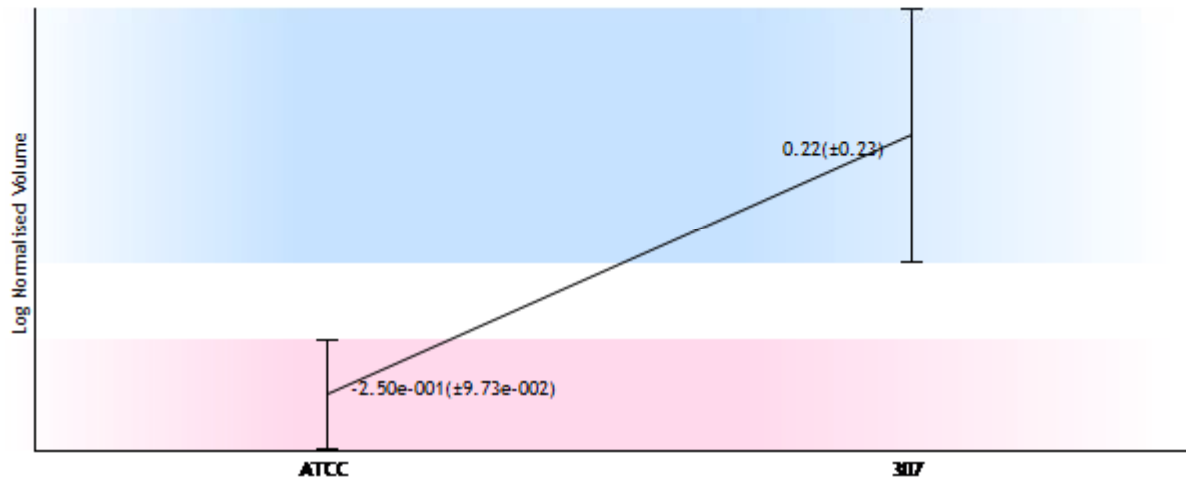

Figure S3.12 Representation of comparative Progenesis gel analysis of normalized gel image of native strain ATCC with high resistant strain RS 307 using Progenesis software. All the combined results are displayed for upregulated master spot no 107 in Progenesis of master gel which is same as that of master number 327 in decyder.

## Identifier 176

Position (419, 181)

### Notes

- Anova p-value  $\leq 0.05$
- Fold > 2
- up in 307

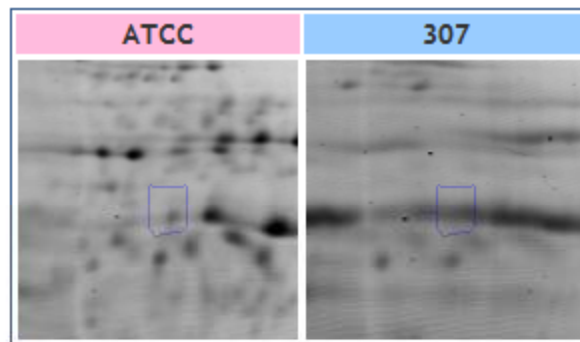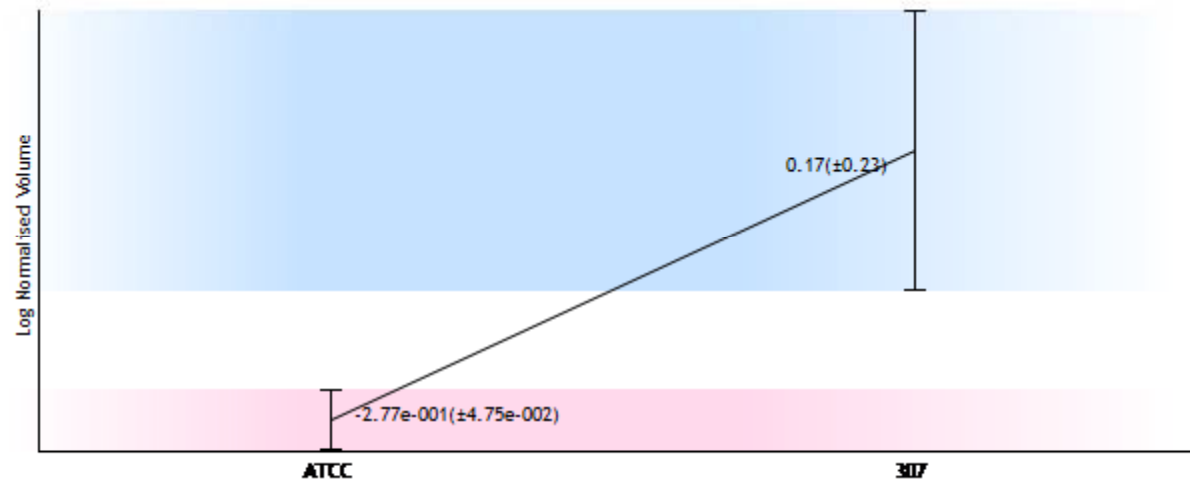

Figure S3.13 Representation of comparative Progenesis gel analysis of normalized gel image of native strain ATCC with high resistant strain RS 307 using Progenesis software. All the combined results are displayed for upregulated master spot no. 176 in Progenesis of master gel which is same as that of master number 432 in decydr.

## Identifier 180

Position (284, 183)

### Notes

■ Anova p-value  $\leq 0.05$

■ Fold>2

■ up in 307

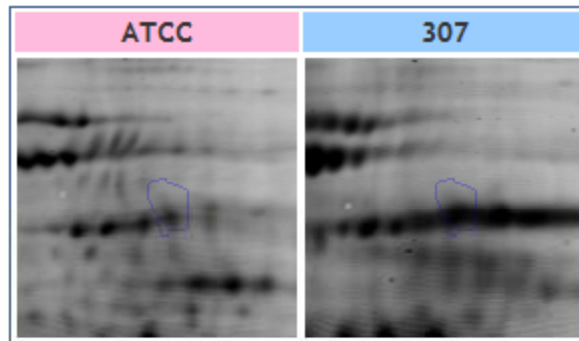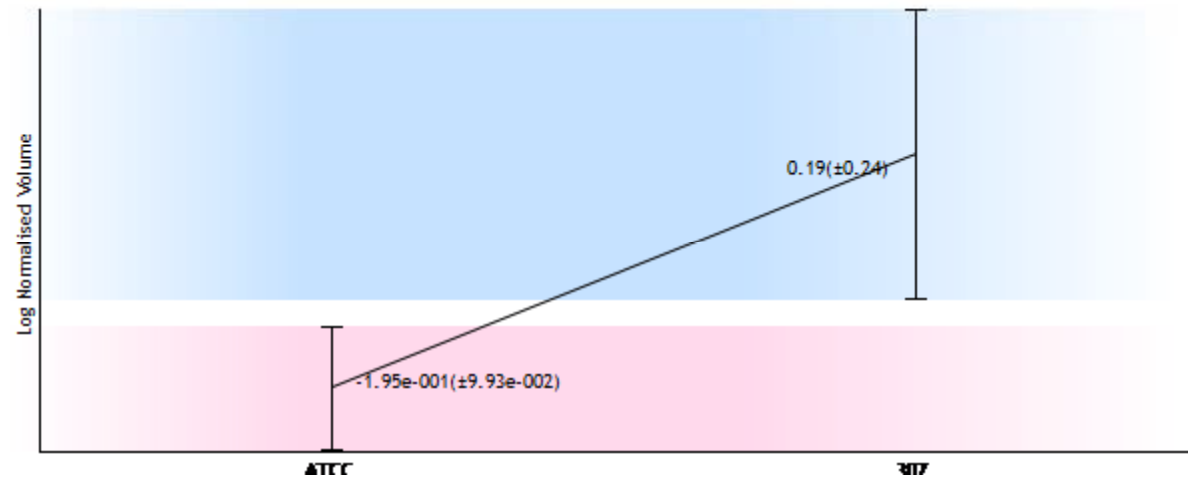

**Figure S3.14** Representation of comparative Progenesis gel analysis of normalized gel image of native strain ATCC with high resistant strain RS 307 using Progenesis software. All the combined results are displayed for upregulated master spot no 180 in Progenesis of master gel which is same as that of master number 434 in decyder.

## Identifier 420

Position (424, 394)

### Notes

- Anova p-value  $\leq 0.05$
- Down in 307
- Fold > 2

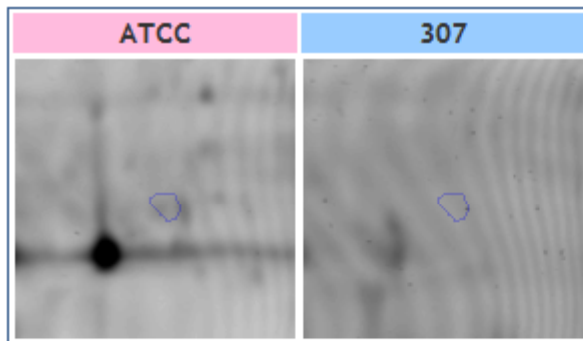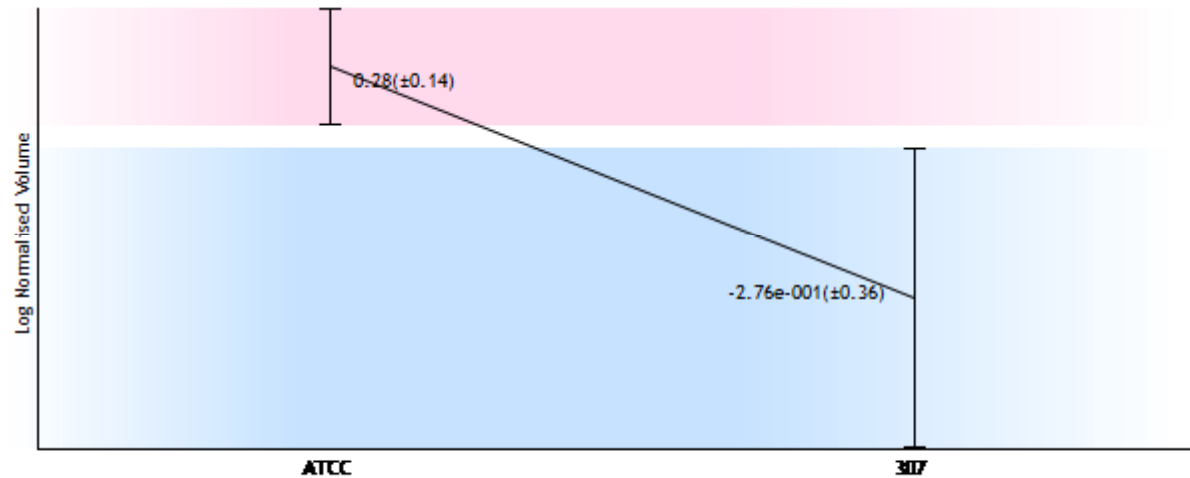

**Figure S3.15** Representation of comparative Progenesis gel analysis of normalized gel image of native strain ATCC with high resistant strain RS 307 using Progenesis software. All the combined results are displayed for downregulated master spot no. 420 in Progenesis of master gel which is same as that of master number 945 in decydr.

## Identifier 465

Position (313, 449)

### Notes

- Anova p-value  $\leq 0.05$
- Down in 307
- Fold $>2$

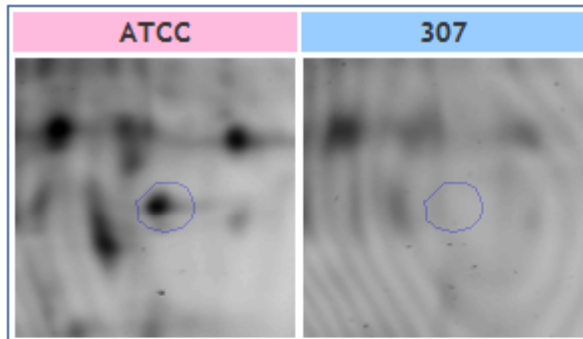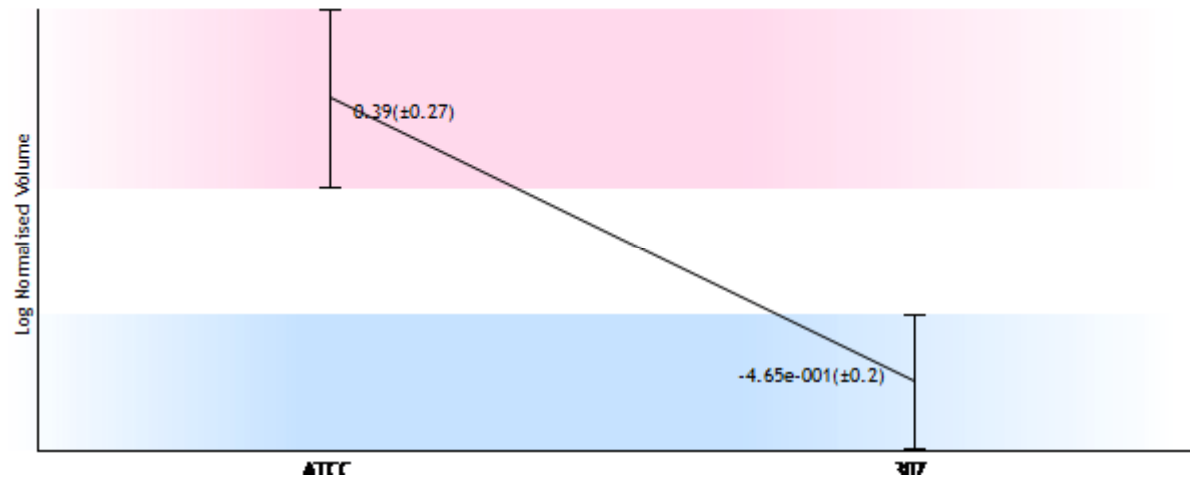

Figure S3.16 Representation of comparative Progenesis gel analysis of normalized gel image of native strain ATCC with high resistant strain RS 307 using Progenesis software. All the combined results are displayed for downregulated master spot no. 465 in Progenesis of master gel which is same as that of master number 1004 in decyder.



## Identifier 579

Position (168, 590)

### Notes

- Anova p-value  $\leq 0.05$
- Down in 307
- Fold > 2

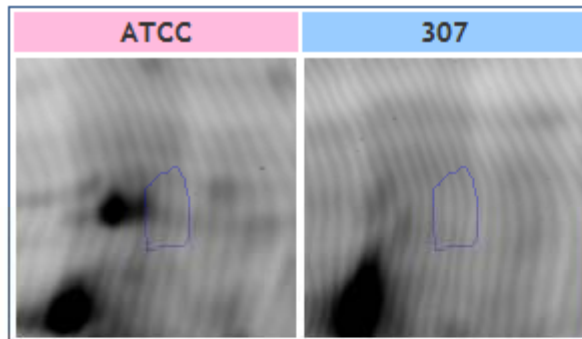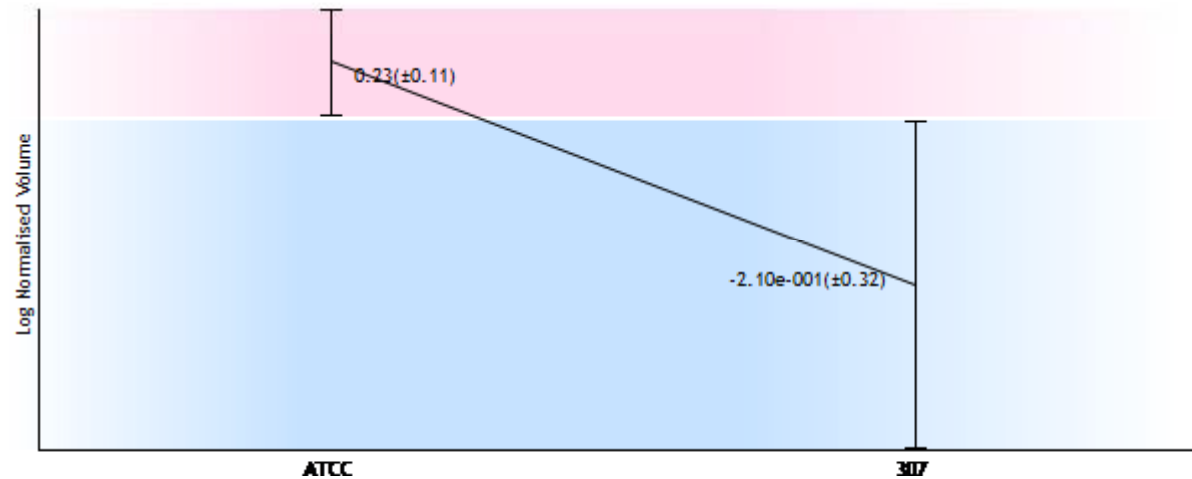

Figure S3.17 Representation of comparative Progenesis gel analysis of normalized gel image of native strain ATCC with high resistant strain RS 307 using Progenesis software. All the combined results are displayed for downregulated master spot no. 579 in Progenesis of master gel which is same as that of master number 1266 in decydr.

## Identifier 582

Position (149, 592)

### Notes

- Anova p-value  $\leq 0.05$
- Down in 307
- Fold > 2

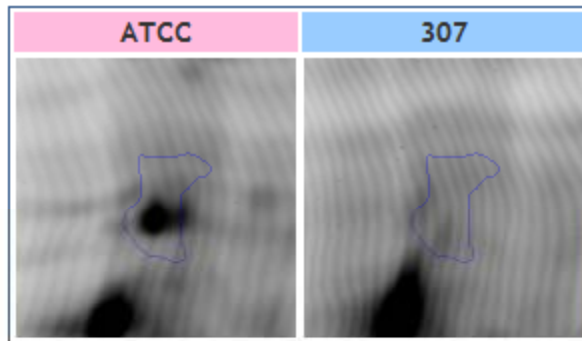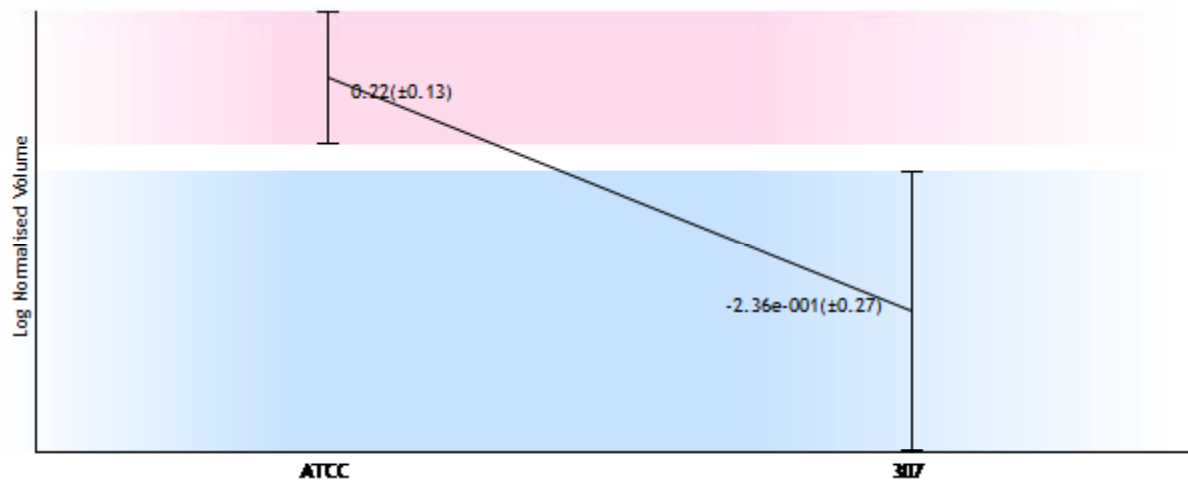

Figure S3.18 Representation of comparative Progenesis gel analysis of normalized gel image of native strain ATCC with high resistant strain RS 307 using Progenesis software. All the combined results are displayed for downregulated master spot no. 582 in Progenesis of master gel which is same as that of master number 1269 in decyder.
