# Supplementary material for: Comparative Proteomics of Inner Membrane Fraction from Carbapenem-Resistant Acinetobacter baumannii with a Reference Strain
Source: PubMed Central journal article supplement (PMC3383706; doi:10.1371/journal.pone.0039451), 2012-06-26
Supplement: pone.0039451.s004.pdf [file pone.0039451.s004.pdf]

# Mascot Search Results

## Protein View

Match to: [gi|7258342](#) Score: 156

**beta-lactamase class C [Acinetobacter baumannii]**

Found in search of C:\Temp\mas3C.tmp

Nominal mass ( $M_r$ ): **43237**; Calculated pI value: **9.49**

NCBI BLAST search of [gi|7258342](#) against nr

Unformatted [sequence string](#) for pasting into other applications

Taxonomy: [Acinetobacter baumannii](#)

Links to retrieve other entries containing this sequence from NCBI Entrez:

[gi|37699616](#) from [Acinetobacter baumannii](#)

Fixed modifications: Carbamidomethyl (C)

Variable modifications: Oxidation (M)

Cleavage by Trypsin: cuts C-term side of KR unless next residue is P

Sequence Coverage: **10%**

Matched peptides shown in **Bold Red**

```

1  MRFKKISCLL LSPLFIFSTS IYAGNTPKDQ EIKKLVDQNF KPLLEKYDVP
51  GMAVGVIQNN KKYEMYGLQ SVQDKKAVNS STIFELGSVS KLFTATAGGY
101 AKNKGKISFD DTPGKYWKEL KNTPIDQVNL LQLATYTSGN LALQFPDEVK
151 TDQQVLTFFK DWKPKNSIGE YRQYSNPSIG LFGKVVALSM NKPFDQVLEK
201 TIFPALGLKH SYVNVPKTQM QNYAFGYNQE NQPIRVNPGP LGAPAYGVKS
251 TLPDMLSFIH ANLNPQKYPA DIQRAINETH QGRYQVNTMY QALGWEEFSY
301 PATLQTLTLLDS NSEQIVMKPN KVTAISKEPS VKMYHKTGST NRFGTYVVFI
351 PKENIGLVML TNKRIPNEER IKAAYAVLNA IKK
    
```

Residue Number      Increasing Mass      Decreasing Mass

| Start - End | Observed | Mr(expt)  | Mr(calc)  | Delta   | Miss | Sequence                                                                  |
|-------------|----------|-----------|-----------|---------|------|---------------------------------------------------------------------------|
| 77 - 91     | 770.3636 | 1538.7126 | 1537.7988 | 0.9138  | 0    | K.AVNSSTIFELGSVSK.L ( <a href="#">Ions score 83</a> )                     |
| 201 - 209   | 480.2817 | 958.5488  | 958.5851  | -0.0364 | 0    | K.TIFPALGLK.H ( <a href="#">Ions score 38</a> )                           |
| 250 - 267   | 681.3320 | 2040.9742 | 2041.0302 | -0.0561 | 0    | K.STLPDMLSFIHANLNPQK.Y Oxidation (M)<br>( <a href="#">Ions score 34</a> ) |

Error: try setting browser cache to automatic.

Error: try setting browser cache to automatic.

LOCUS CAB77444 383 aa linear BCT 15-APR-2005 DEFINITION beta-lactamase class C [Acinetobacter baumannii].  
 ACCESSION CAB77444 VERSION CAB77444.1 GI:7258342 DBSOURCE embl accession [AJ009979.1](#) KEYWORDS . SOURCE  
 Acinetobacter baumannii ORGANISM [Acinetobacter baumannii](#) Bacteria; Proteobacteria; Gammaproteobacteria;  
 Pseudomonadales; Moraxellaceae; Acinetobacter; Acinetobacter calcoaceticus/baumannii complex. REFERENCE 1  
 AUTHORS Bou,G. and Mart inverted question markinez-Beltr inverted question markan,J. TITLE Cloning,  
 nucleotide sequencing, and analysis of the gene encoding an AmpC beta-lactamase in Acinetobacter baumannii  
 JOURNAL Antimicrob. Agents Chemother. 44 (2), 428-432 (2000) PUBMED [10639377](#) REFERENCE 2 (residues 1 to  
 383) AUTHORS Bou,G. TITLE Direct Submission JOURNAL Submitted (10-AUG-1999) Bou G., Microbiology, Hospital  
 Ramon Y Cajal, Crta. Colmenar Viejo Km 9,1, Madrid/28034, SPAIN FEATURES Location/Qualifiers source  
 1..383 /organism="Acinetobacter baumannii" /isolate="RYC 52763/97" /db\_xref="taxon:[470](#)" [Protein](#) 1..383 /  
 product="beta-lactamase class C" /EC\_number="[3.5.2.6](#)" [Region](#) 1..380 /region\_name="AmpC" /note="Beta-  
 lactamase class C and other penicillin binding proteins [Defense mechanisms]; COG1680" /  
 db\_xref="CDD:[31866](#)" [Region](#) 4..382 /region\_name="Beta-lactamase" /note="Beta-lactamase; cl01009" /  
 db\_xref="CDD:[194006](#)" [CDS](#) 1..383 /gene="ampC" /coded\_by="AJ009979.1:1..1152" /transl\_table=[11](#) /db\_xref="GOA:  
[Q9L4R5](#)" /db\_xref="HSSP:[Q99QC1](#)" /db\_xref="InterPro:[IPR001466](#)" /db\_xref="InterPro:[IPR001586](#)" /  
 db\_xref="InterPro:[IPR012338](#)" /db\_xref="UniProtKB/TrEMBL:[Q9L4R5](#)"

Mascot: <http://www.matrixscience.com/>

# Mascot Search Results

## Protein View

Match to: **gi|57491188** Score: **127**  
**carbapenem-hydrolyzing oxacillinase OXA-71 [Acinetobacter baumannii]**  
 Found in search of C:\Temp\masB0.tmp

Nominal mass ( $M_r$ ): **30635**; Calculated pI value: **8.43**

NCBI BLAST search of [gi|57491188](#) against nr  
 Unformatted [sequence string](#) for pasting into other applications

Taxonomy: [Acinetobacter baumannii](#)

Links to retrieve other entries containing this sequence from NCBI Entrez:  
[gi|58701180](#) from [Acinetobacter baumannii](#)

Fixed modifications: Carbamidomethyl (C)  
 Variable modifications: Oxidation (M)  
 Cleavage by Trypsin: cuts C-term side of KR unless next residue is P  
 Sequence Coverage: **8%**

Matched peptides shown in **Bold Red**

```

1 MNIKALLLIT SAIFISACSP YIVTANPNHS ASKSDEKAEK IKNLFNEAHT
51 TGVLVIIQQGQ TQOSYGNDLA RASTEYVPAS TFKMLNALIG LEHHKTTTTE
101 VFKWDGQKRL FPEWEKDMTL GDAMKASAIP VYQDLARRIG LELMSKEVKR
151 VG YGNADIGT QVDNFWLVGP LKITPQQEAO FAYKLANKTL PFSPKVQDEV
201 QSMLFIEEKN GNKIYAKSGW GWDVDPQVGW LTGWVVPQPG NIVAFSLNLE
251 MKKGIPSSVR KEITYKSLEQ LGIL
    
```

Residue Number      Increasing Mass      Decreasing Mass

| Start - End | Observed | Mr(expt)  | Mr(calc)  | Delta  | Miss | Sequence                                                          |
|-------------|----------|-----------|-----------|--------|------|-------------------------------------------------------------------|
| 150 - 172   | 840.7504 | 2519.2294 | 2518.2969 | 0.9325 | 1    | <b>K.RVGYGNADIGTQVDNFWLVGPLK.I</b> ( <a href="#">Ions score</a> ) |

41)

151 - 172 1182.5615 2363.1084 2362.1958 0.9126 0 R.VGYGNADIGTQVDNFWLVGPLK.I ([Ions score](#)

86)

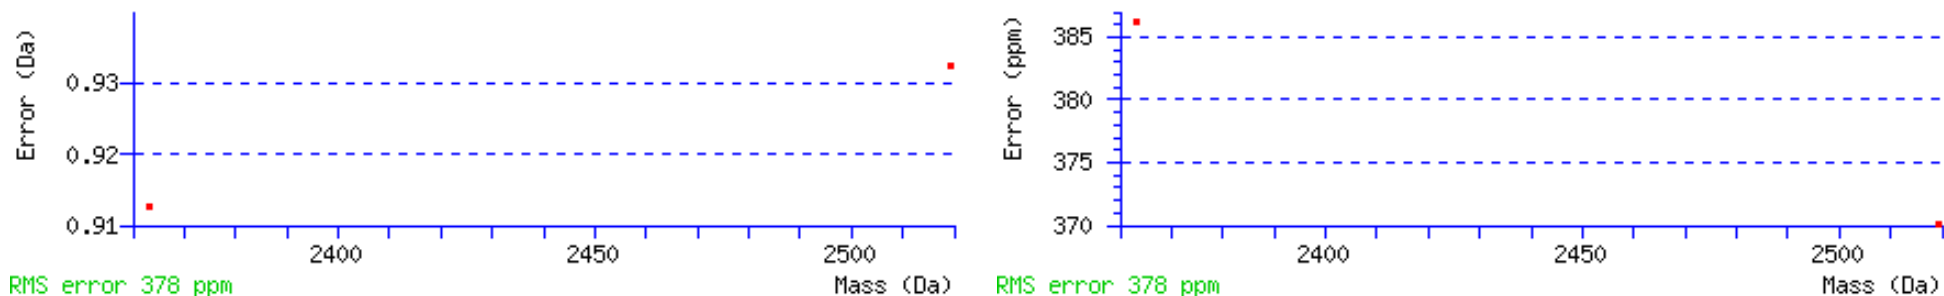

LOCUS AAW51372 274 aa linear BCT 29-SEP-2005  
 DEFINITION carbapenem-hydrolyzing oxacillinase OXA-71 [Acinetobacter baumannii].  
 ACCESSION AAW51372  
 VERSION AAW51372.1 GI:57491188  
 DBSOURCE accession [AY859528.1](#)  
 KEYWORDS .  
 SOURCE Acinetobacter baumannii  
 ORGANISM [Acinetobacter baumannii](#)  
 Bacteria; Proteobacteria; Gammaproteobacteria; Pseudomonadales; Moraxellaceae; Acinetobacter; Acinetobacter calcoaceticus/baumannii complex.  
 REFERENCE 1 (residues 1 to 274)  
 AUTHORS Heritier,C., Poirel,L., Fournier,P.E., Claverie,J.M., Raoult,D. and Nordmann,P.  
 TITLE Characterization of the naturally occurring oxacillinase of Acinetobacter baumannii  
 JOURNAL Antimicrob. Agents Chemother. 49 (10), 4174-4179 (2005)  
 PUBMED [16189095](#)  
 REFERENCE 2 (residues 1 to 274)  
 AUTHORS Poirel,L. and Nordmann,P.  
 TITLE Direct Submission  
 JOURNAL Submitted (17-DEC-2004) Service de Bacteriologie-Virologie, Hopital de Bicetre, 78, rue du General Leclerc, Le Kremlin Bicetre 94275,

France  
COMMENT Method: conceptual translation supplied by author.  
FEATURES Location/Qualifiers  
source 1..274  
/organism="Acinetobacter baumannii"  
/db\_xref="taxon:470"  
[Protein](#) 1..274  
/product="carbapenem-hydrolyzing oxacillinase OXA-71"  
[Region](#) 50..274  
/region\_name="Transpeptidase"  
/note="Penicillin binding protein transpeptidase domain;  
c101039"  
/db\_xref="CDD:154162"  
[CDS](#) 1..274  
/gene="bla-OXA-71"  
/coded\_by="AY859528.1:1..825"  
/transl\_table=11

Mascot: <http://www.matrixscience.com/>

# Mascot Search Results

## Protein View

Match to: **ATPB\_ACIBC** Score: **860**

**ATP synthase subunit beta OS=Acinetobacter baumannii (strain ACICU) GN=atpD PE=3 SV=1**

Found in search of C:\Temp\mas2F.tmp

Nominal mass ( $M_r$ ): **50300**; Calculated pI value: **5.03**

NCBI BLAST search of [ATPB\\_ACIBC](#) against nr

Unformatted [sequence string](#) for pasting into other applications

Taxonomy: [Acinetobacter baumannii ACICU](#)

Fixed modifications: Carbamidomethyl (C)

Variable modifications: Oxidation (M)

Cleavage by Trypsin: cuts C-term side of KR unless next residue is P

Sequence Coverage: **48%**

Matched peptides shown in **Bold Red**

```

1  MSSGRIIQII GAVIDVEFER TSVPKIYDAL QVDGTETTLE VQQQLGDGVV
51  RTIAMGSTEG LKRGLTVTST NAPISVPVGT ATLGRIMDVL GRPIDEAGPV
101 ATEERLPIHR QAPSYAEQAA STDLLETGIK VIDLLCPFAK GGKVGLFGGA
151 GVGKTVNMME LINNIAKAHS GLSVFAGVGE RTREGNDFYH EMKDSNVLDK
201 VAMVYQMNE PPGNRLRVAL TGLTMAEYFR DEKDENGKGR DVLLFVDNIY
251 RYTLAGTEVS ALLGRMPHAV GYQPTLAEEM GVLQERITST KSGSITSIQA
301 VYVPADDLTD PSPATTF AHL DATVVLSRDI ASSGIYPAID PLDSTSRQLD
351 PLVVGQEHYE IARAVQNVLQ RYKELKDIIA ILGMDELAEE DKLVVYRARK
401 IQRFFSQPFH VAEVFTGAPG KLVPLKETIR GFKGLLAGEY DHIPEQAFYM
451 VGGIDEVIAK AEKL
    
```

Residue Number      Increasing Mass      Decreasing Mass

**Start - End      Observed      Mr(expt)      Mr(calc)      Delta      Miss Sequence**

|           |           |           |           |         |   |                                 |                                                   |
|-----------|-----------|-----------|-----------|---------|---|---------------------------------|---------------------------------------------------|
| 26 - 51   | 950.1423  | 2847.4052 | 2846.4298 | 0.9753  | 0 | K.IYDALQVDGTETTLEVQQQLGDGVVR.T  | ( <a href="#">Ions score 93</a> )                 |
| 64 - 85   | 704.7760  | 2111.3061 | 2111.1587 | 0.1475  | 0 | R.GLTVTSTNAPISVPVGTATLGR.I      | ( <a href="#">Ions score 26</a> )                 |
| 64 - 85   | 1057.0977 | 2112.1809 | 2111.1587 | 1.0222  | 0 | R.GLTVTSTNAPISVPVGTATLGR.I      | ( <a href="#">Ions score 27</a> )                 |
| 64 - 85   | 1057.1099 | 2112.2052 | 2111.1587 | 1.0466  | 0 | R.GLTVTSTNAPISVPVGTATLGR.I      | ( <a href="#">Ions score 22</a> )                 |
| 86 - 105  | 729.0422  | 2184.1049 | 2183.0892 | 1.0157  | 0 | R.IMDVLGRPIDEAGPVATEER.L        | Oxidation (M) ( <a href="#">Ions score 79</a> )   |
| 131 - 140 | 588.3135  | 1174.6124 | 1174.6420 | -0.0296 | 0 | K.VIDLLCPFAK.G                  | ( <a href="#">Ions score 32</a> )                 |
| 144 - 154 | 481.2877  | 960.5608  | 960.5393  | 0.0215  | 0 | K.VGLFGGAGVGK.T                 | ( <a href="#">Ions score 61</a> )                 |
| 168 - 181 | 693.3792  | 1384.7438 | 1385.7052 | -0.9613 | 0 | K.AHSGLSVFAGVGER.T              | ( <a href="#">Ions score 16</a> )                 |
| 168 - 181 | 693.8704  | 1385.7263 | 1385.7052 | 0.0211  | 0 | K.AHSGLSVFAGVGER.T              | ( <a href="#">Ions score 79</a> )                 |
| 218 - 230 | 736.3869  | 1470.7593 | 1470.7541 | 0.0053  | 0 | R.VALTGLTMAEYFR.D               | ( <a href="#">Ions score 90</a> )                 |
| 218 - 230 | 744.3923  | 1486.7700 | 1486.7490 | 0.0210  | 0 | R.VALTGLTMAEYFR.D               | Oxidation (M) ( <a href="#">Ions score 55</a> )   |
| 241 - 251 | 683.8805  | 1365.7465 | 1365.7292 | 0.0173  | 0 | R.DVLLFVDNIYR.Y                 | ( <a href="#">Ions score 57</a> )                 |
| 252 - 265 | 725.9000  | 1449.7855 | 1449.7827 | 0.0027  | 0 | R.YTLAGTEVSALLGR.M              | ( <a href="#">Ions score 93</a> )                 |
| 266 - 286 | 780.3000  | 2337.8782 | 2337.0981 | 0.7801  | 0 | R.MPSAVGYQPTLAEEMGVLQER.I       | 2 Oxidation (M) ( <a href="#">Ions score 26</a> ) |
| 266 - 286 | 780.3692  | 2338.0858 | 2337.0981 | 0.9877  | 0 | R.MPSAVGYQPTLAEEMGVLQER.I       | 2 Oxidation (M) ( <a href="#">Ions score 79</a> ) |
| 329 - 347 | 989.5004  | 1976.9863 | 1976.9691 | 0.0172  | 0 | R.DIASSGIYPAIDPLDSTR.Q          | ( <a href="#">Ions score 71</a> )                 |
| 404 - 421 | 983.9978  | 1965.9810 | 1964.9785 | 1.0025  | 0 | R.FFSQPFHVAEVFTGAPGK.L          | ( <a href="#">Ions score 76</a> )                 |
| 434 - 460 | 984.4859  | 2950.4359 | 2950.4422 | -0.0064 | 0 | K.GLLAGEYDHIPEQAFYMVGGIDEVIAK.A | Oxidation (M) ( <a href="#">Ions score 21</a> )   |

Error: try setting browser cache to automatic.

Error: try setting browser cache to automatic.

AC B2I102; DT 14-APR-2009, integrated into UniProtKB/Swiss-Prot. DT 10-JUN-2008, sequence version 1. DT 27-JUL-2011, entry version 26. DE RecName: Full=ATP synthase subunit beta; DE EC=3.6.3.14; DE AltName: Full=ATP synthase F1 sector subunit beta; DE AltName: Full=F-ATPase subunit beta; GN Name=atpD; OrderedLocusNames=ACICU\_00178; OS Acinetobacter baumannii (strain ACICU). OC Bacteria; Proteobacteria; Gammaproteobacteria; Pseudomonadales; OC Moraxellaceae; Acinetobacter; OC Acinetobacter calcoaceticus/baumannii complex. OX NCBI\_TaxID=405416; RN [1] RP NUCLEOTIDE SEQUENCE [LARGE SCALE GENOMIC DNA]. RC STRAIN=ACICU; RX PubMed=18411315; DOI=10.1128/AAC.01643-07; RA Iacono M., Villa L., Fortini D., Bordoni R., Imperi F., Bonnal R.J., RA Sicheritz-Ponten T., De Bellis G., Visca P., Cassone A., Carattoli A.; RT "Whole-genome pyrosequencing of an epidemic multidrug-resistant RT Acinetobacter baumannii strain belonging to the European clone II RT group."; RL Antimicrob. Agents Chemother. 52:2616-2625(2008). CC -!- FUNCTION: Produces ATP from ADP in the presence of a proton CC gradient across the membrane. The catalytic sites are hosted CC primarily by the beta subunits (By similarity). CC -!- CATALYTIC ACTIVITY: ATP + H(2)O + H(+)(In) = ADP + phosphate + CC H(+)(Out). CC -!- SUBUNIT: F-type ATPases have 2 components, CF(1) - the catalytic CC core - and CF(0) - the membrane proton channel. CF(1) has five CC subunits: alpha(3), beta(3), gamma(1), delta(1), epsilon(1). CF(0) CC has three main subunits: a(1), b(2) and c(9-12). The alpha and CC beta chains form an alternating ring which encloses part of the CC gamma chain. CF(1) is attached to CF(0) by a central stalk formed CC by the gamma and epsilon chains, while a peripheral stalk is CC formed by the delta and b chains (By similarity). CC -!- SUBCELLULAR LOCATION: Cell inner membrane; Peripheral membrane CC protein (By similarity). CC -!- SIMILARITY: Belongs to the ATPase alpha/beta chains family. CC ----- CC Copyrighted by the UniProt Consortium, see <http://www.uniprot.org/terms> CC Distributed under the Creative Commons Attribution-NoDerivs License CC ----- DR EMBL; CP000863; ACC55490.1; -; Genomic\_DNA. DR RefSeq; YP\_001844837.1; NC\_010611.1. DR ProteinModelPortal; B2I102; -. DR SMR; B2I102; 2-464. DR STRING; B2I102; -. DR GeneID; 6236208; -. DR GenomeReviews; CP000863\_GR; ACICU\_00178. DR KEGG; abc:ACICU\_00178; -. DR HOGENOM; HBG565875; -. DR OMA; IGQEHYD; -. DR ProtClustDB; PRK12597; -. DR GO; GO:0005886; C:plasma membrane; IEA:UniProtKB-SubCell. DR GO; GO:0045261; C:proton-transporting ATP synthase complex, catalytic core F(1); IEA:UniProtKB-KW. DR GO; GO:0005524; F:ATP binding; IEA:UniProtKB-KW. DR GO; GO:0046933; F:hydrogen ion transporting ATP synthase activity, rotational mechanism; IEA:InterPro. DR GO; GO:0008553; F:hydrogen-exporting ATPase activity, phosphorylative mechanism; IEA:InterPro. DR GO; GO:0046961; F:proton-transporting ATPase activity, rotational mechanism; IEA:InterPro. DR GO; GO:0015991; P:ATP hydrolysis coupled proton transport; IEA:InterPro. DR GO; GO:0015986; P:ATP synthesis coupled proton transport; IEA:InterPro. DR HAMAP; MF\_01347; ATP\_synth\_beta\_bact; 1; -. DR InterPro; IPR020003; ATPase\_a/bsu\_AS. DR InterPro; IPR003593; ATPase\_AAA+\_core. DR InterPro; IPR005722; ATPase\_F1-cplx\_bsu. DR InterPro; IPR018118; ATPase\_F1/A1-cplx\_a/bsu\_N. DR InterPro; IPR000793; ATPase\_F1/V1/A1-cplx\_a/bsu\_C. DR InterPro; IPR004100; ATPase\_F1/V1/A1-cplx\_a/bsu\_N. DR InterPro; IPR000194; ATPase\_F1/V1/A1\_a/bsu\_nucl-bd. DR InterPro; IPR024034; ATPase\_F1\_bsu/V1\_C. DR Gene3D; G3DSA:1.10.1140.10; G3DSA:1.10.1140.10; 1. DR PANTHER; PTHR15184:SF8; ATPase\_F1\_b; 1. DR Pfam; PF00006; ATP-synt\_ab; 1. DR Pfam; PF00306; ATP-synt\_ab\_C; 1. DR Pfam; PF02874; ATP-synt\_ab\_N; 1. DR SMART; SM00382; AAA; 1. DR SUPFAM; SSF47917; ATPase\_a/b\_C; 1. DR SUPFAM; SSF50615; ATPase\_a/b\_N; 1. DR TIGRFAMs; TIGR01039; AtpD; 1. DR PROSITE; PS00152; ATPASE\_ALPHA\_BETA; 1. PE 3: Inferred from homology; KW ATP synthesis; ATP-binding; Cell inner membrane; Cell membrane; CF(1); KW Complete proteome; Hydrogen ion



transport; Hydrolase; Ion transport; KW Membrane; Nucleotide-binding; Transport. FT CHAIN 1 464 ATP synthase subunit beta. FT /FTId=PRO\_1000143462. FT NP\_BIND 148 155 ATP (By similarity). SQ SEQUENCE 464 AA; 50274 MW; 6D679361227BC1D6 CRC64; MSSGRIIQII GAVIDVEFER TSVPKIYDAL QVDGTETTLE VQQQLGDGVV RTIAMGSTEG LKRGLTVTST NAPISVPVGT ATLGRIMDVL GRPIDEAGPV ATEERLPIHR QAPSYAEQAA STDLLETGIK VIDLLCPFAK GGKVGLFGGA GVGKTVNMME LINNIKAHS GLSVFAGVGE RTREGNDFYH EMKDSNVLDK VAMVYQMNE PPGNRLRVAL TGLTMAEYFR DEKDENGKGR DVLLFVDNIY RYTLAGTEVS ALLGRMPSAV GYQPTLAEEM GVLQERITST KSGSITSIQA VYVPADDLTD PSPATTF AHL DATVVLSRDI ASSGIYPAID PLDSTSRQLD PLVVGQEHYE IARAVQNVLQ RYKELKDIIA ILGMDELAEE DKLVVYRARK IQRFFSQPFH VAEVFTGAPG KLVPLKETIR GFKGLLAGEY DHIPEQAFYM VGGIDEVIAK AEKL

**Mascot:** <http://www.matrixscience.com/>

# Mascot Search Results

## Protein View

Match to: **ATPA\_ACIBC** Score: **371**

**ATP synthase subunit alpha OS=Acinetobacter baumannii (strain ACICU) GN=atpA PE=3 SV=1**

Found in search of C:\Temp\mas21.tmp

Nominal mass ( $M_r$ ): **55534**; Calculated pI value: **5.29**

NCBI BLAST search of [ATPA\\_ACIBC](#) against nr

Unformatted [sequence string](#) for pasting into other applications

Taxonomy: [Acinetobacter baumannii ACICU](#)

Fixed modifications: Carbamidomethyl (C)

Variable modifications: Oxidation (M)

Cleavage by Trypsin: cuts C-term side of KR unless next residue is P

Sequence Coverage: **16%**

Matched peptides shown in **Bold Red**

```

1  MQQLNPSEIS ALIKQRIGDL DTSATAKNEG TIVMVSDGIV RIHGLADAMY
51  GEMIEFDGGL FGMALNLEQD SVGAVVLGNY LSLQEGQKAR CTGRVLEVPV
101 GPELLGRVVD ALGNPIDGKG PIDAKLTDAV EKVAPGVIWR QSVDQPVQTG
151 YKSVDTMIPV GRGQRELIIG DRQTGKTAMA IDAIIAQKNS GIKCVYVAIG
201 QKQSTIANVV RKLEETGAMA YTTVVAAAAA DPAAMQYLAP YSGCTMGEYF
251 RDRGEDALII YDDLSKQAVA YRQISLLLR PPGREAYPGD VFYLHSRLLE
301 RASRVSAEYV EKFTNGAVTG KTGSLTALPI IETQAGDVSA FVPTNVISIT
351 DGQIFLETSL FNAGIRPAVN AGISVSRVGG SAQTKIIKKL SGGIRTALAQ
401 YRELAAFAQF ASDLDEATRK QLEHGQRVTE LMKQKQYAPY SIADQAVSVY
451 ASNEGYMADV EVKKIVDFDA ALIAYFRSEY APLMKQIDET GDYNKDIEAA
501 IKAGIESFKA TQTY
    
```

Residue Number      Increasing Mass      Decreasing Mass

| Start - End | Observed | Mr(expt)  | Mr(calc)  | Delta   | Miss | Sequence             |                                                 |
|-------------|----------|-----------|-----------|---------|------|----------------------|-------------------------------------------------|
| 1 - 14      | 794.4132 | 1586.8119 | 1586.8338 | -0.0218 | 0    | -.MQQLNPSEISALIK.Q   | Oxidation (M) ( <a href="#">Ions score 41</a> ) |
| 1 - 14      | 794.4291 | 1586.8436 | 1586.8338 | 0.0099  | 0    | -.MQQLNPSEISALIK.Q   | Oxidation (M) ( <a href="#">Ions score 50</a> ) |
| 95 - 107    | 689.4188 | 1376.8230 | 1376.8028 | 0.0203  | 0    | R.VLEVPVGPPELLGR.V   | ( <a href="#">Ions score 48</a> )               |
| 95 - 107    | 689.4213 | 1376.8280 | 1376.8028 | 0.0252  | 0    | R.VLEVPVGPPELLGR.V   | ( <a href="#">Ions score 33</a> )               |
| 252 - 266   | 862.4392 | 1722.8639 | 1721.8472 | 1.0167  | 1    | R.DRGEDALIIYDDLK.Q   | ( <a href="#">Ions score 76</a> )               |
| 254 - 266   | 726.3824 | 1450.7502 | 1450.7191 | 0.0311  | 0    | R.GEDALIIYDDLK.Q     | ( <a href="#">Ions score 24</a> )               |
| 285 - 297   | 777.3899 | 1552.7652 | 1552.7310 | 0.0342  | 0    | R.EAYPGDVFYLHSR.L    | ( <a href="#">Ions score 80</a> )               |
| 403 - 419   | 927.9584 | 1853.9022 | 1853.8795 | 0.0227  | 0    | R.ELAFAQFASDLDEATR.K | ( <a href="#">Ions score 59</a> )               |
| 465 - 477   | 757.4214 | 1512.8282 | 1512.7977 | 0.0305  | 0    | K.IVDFDAALIAFR.S     | ( <a href="#">Ions score 38</a> )               |

Error: try setting browser cache to automatic.

Error: try setting browser cache to automatic.

---

AC B2I100; DT 14-APR-2009, integrated into UniProtKB/Swiss-Prot. DT 10-JUN-2008, sequence version 1. DT 27-JUL-2011, entry version 28. DE RecName: Full=ATP synthase subunit alpha; DE EC=3.6.3.14; DE AltName: Full=ATP synthase F1 sector subunit alpha; DE AltName: Full=F-ATPase subunit alpha; GN Name=atpA; OrderedLocusNames=ACICU\_00176; OS Acinetobacter baumannii (strain ACICU). OC Bacteria; Proteobacteria; Gammaproteobacteria; Pseudomonadales; OC Moraxellaceae; Acinetobacter; OC Acinetobacter calcoaceticus/baumannii complex. OX NCBI\_TaxID=405416; RN [1] RP NUCLEOTIDE SEQUENCE [LARGE SCALE GENOMIC DNA]. RC STRAIN=ACICU; RX PubMed=18411315; DOI=10.1128/AAC.01643-07; RA Iacono M., Villa L., Fortini D., Bordoni R., Imperi F., Bonnal R.J., RA Sicheritz-Ponten T., De Bellis G., Visca P., Cassone A., Carattoli A.; RT "Whole-genome pyrosequencing of an epidemic multidrug-resistant RT Acinetobacter baumannii strain belonging to the European clone II RT group."; RL Antimicrob. Agents Chemother. 52:2616-2625(2008). CC -!- FUNCTION: Produces ATP from ADP in the presence of a proton CC gradient across the membrane. The alpha chain is a regulatory CC subunit (By similarity). CC -!- CATALYTIC ACTIVITY: ATP + H(2)O + H(+)(In) = ADP + phosphate + CC H(+)(Out). CC -!- SUBUNIT: F-type ATPases have 2 components, CF(1) - the catalytic CC core - and CF(0) - the membrane proton channel. CF(1) has five CC subunits: alpha(3), beta(3), gamma(1), delta(1), epsilon(1). CF(0) CC has three main subunits: a(1), b(2) and c(9-12). The alpha and CC beta chains form an alternating ring which encloses part of the CC gamma chain. CF(1) is attached to CF(0) by a

central stalk formed CC by the gamma and epsilon chains, while a peripheral stalk is CC formed by the delta and b chains (By similarity). CC -!- SUBCELLULAR LOCATION: Cell inner membrane; Peripheral membrane CC protein (By similarity). CC -!- SIMILARITY: Belongs to the ATPase alpha/beta chains family. CC ----- CC Copyrighted by the UniProt Consortium, see <http://www.uniprot.org/terms> CC Distributed under the Creative Commons Attribution-NoDerivs License CC ----- DR EMBL; CP000863; ACC55488.1; -; Genomic\_DNA. DR RefSeq; YP\_001844835.1; NC\_010611.1. DR ProteinModelPortal; B2I100; -. DR SMR; B2I100; 26-511. DR STRING; B2I100; -. DR GeneID; 6236232; -. DR GenomeReviews; CP000863\_GR; ACICU\_00176. DR KEGG; abc:ACICU\_00176; -. DR HOGENOM; HBG565875; -. DR OMA; GSDRDIK; -. DR ProtClustDB; PRK09281; -. DR GO; GO:0005886; C:plasma membrane; IEA:UniProtKB-SubCell. DR GO; GO:0045261; C:proton-transporting ATP synthase complex, catalytic core F(1); IEA:UniProtKB-KW. DR GO; GO:0005524; F:ATP binding; IEA:UniProtKB-KW. DR GO; GO:0046933; F:hydrogen ion transporting ATP synthase activity, rotational mechanism; IEA:InterPro. DR GO; GO:0046961; F:proton-transporting ATPase activity, rotational mechanism; IEA:InterPro. DR GO; GO:0015991; P:ATP hydrolysis coupled proton transport; IEA:InterPro. DR GO; GO:0015986; P:ATP synthesis coupled proton transport; IEA:InterPro. DR HAMAP; MF\_01346; ATP\_synth\_alpha\_bact; 1; -. DR InterPro; IPR020003; ATPase\_a/bsu\_AS. DR InterPro; IPR005294; ATPase\_F1-cplx\_asu. DR InterPro; IPR018118; ATPase\_F1/A1-cplx\_a/bsu\_N. DR InterPro; IPR023366; ATPase\_F1/A1-cplx\_a\_su\_N. DR InterPro; IPR000793; ATPase\_F1/V1/A1-cplx\_a/bsu\_C. DR InterPro; IPR004100; ATPase\_F1/V1/A1-cplx\_a/bsu\_N. DR InterPro; IPR000194; ATPase\_F1/V1/A1\_a/bsu\_nucl-bd. DR Gene3D; G3DSA:2.40.30.20; G3DSA:2.40.30.20; 1. DR PANTHER; PTHR15184:SF3; ATPase\_F1\_a; 1. DR Pfam; PF00006; ATP-synt\_ab; 1. DR Pfam; PF00306; ATP-synt\_ab\_C; 1. DR Pfam; PF02874; ATP-synt\_ab\_N; 1. DR SUPFAM; SSF47917; ATPase\_a/b\_C; 1. DR SUPFAM; SSF50615; ATPase\_a/b\_N; 1. DR TIGRFAMs; TIGR00962; AtpA; 1. DR PROSITE; PS00152; ATPASE\_ALPHA\_BETA; 1. PE 3: Inferred from homology; KW ATP synthesis; ATP-binding; Cell inner membrane; Cell membrane; CF(1); KW Complete proteome; Hydrogen ion transport; Hydrolase; Ion transport; KW Membrane; Nucleotide-binding; Transport. FT CHAIN 1 514 ATP synthase subunit alpha. FT /FTId=PRO\_1000143331. FT NP\_BIND 170 177 ATP (By similarity). FT SITE 374 374 Required for activity (By similarity). SQ SEQUENCE 514 AA; 55397 MW; 63E4A57970B5A718 CRC64; MQQLNPSEIS ALIKQRIGDL DTSATAKNEG TIVMVSDGIV RIHGLADAMY GEMIEFDGGL FGMALNLEQD SVGAVVLGNY LSLQEGQKAR CTGRVLEVPV GPELLGRVVD ALGNPIDGKG PIDAKLTDVA EKVAPGVIWR QSVDPVQVTG YKSVDTMIPV GRGQRELIIG DRQTGKTAMA IDAIIAQKNS GIKCVYVAIG QKQSTIANVV RKLREETGAMA YTTVVAAAAA DPAAMQYLAP YSGCTMGEYF RDRGEDALII YDDLKQAVA YRQISLLLR PPGREAYPGD VFYLSRLLE RASRVSAEYV EKFTNGAVTG KTGSLTALPI IETQAGDVSA FVPTNVISIT DGQIFLETSL FNAGIRPAVN AGISVSRVGG SAQTKIIKKL SGGIRTALAQ YRELAFAQF ASDLDEATRK QLEHGQRVTE LMKQKQYAPY SIADQAVSVY ASNEGYMADV EVKKIVDFDA ALIAYFRSEY APLMKQIDET GDYNKDIEAA IKAGIESFKA TQTY

Mascot: <http://www.matrixscience.com/>

# Mascot Search Results

## Protein View

Match to: **ATPA\_ACIBC** Score: **318**

**ATP synthase subunit alpha OS=Acinetobacter baumannii (strain ACICU) GN=atpA PE=3 SV=1**

Found in search of C:\Temp\mas37.tmp

Nominal mass ( $M_r$ ): **55534**; Calculated pI value: **5.29**

NCBI BLAST search of [ATPA\\_ACIBC](#) against nr

Unformatted [sequence string](#) for pasting into other applications

Taxonomy: [Acinetobacter baumannii ACICU](#)

Fixed modifications: Carbamidomethyl (C)

Variable modifications: Oxidation (M)

Cleavage by Trypsin: cuts C-term side of KR unless next residue is P

Sequence Coverage: **14%**

Matched peptides shown in **Bold Red**

```

1  MQQLNPSEIS ALIKQRIGDL DTSATAKNEG TIVMVSDGIV RIHGLADAMY
51  GEMIEFDGGL FGMALNLEQD SVGAVVLGNY LSLQEGQKAR CTGRVLEVPV
101 GPELLGRVVD ALGNPIDGKG PIDAKLTDV EKVAPGVIWR QSVDPQPVQTG
151 YKSVDTMIPV GRGQRELIIG DRQTGKTAMA IDAIIAQKNS GIKCVYVAIG
201 QKQSTIANVV RKLEETGAMA YTTVVAAAAA DPAAMQYLAP YSGCTMGEYF
251 RDRGEDALII YDDLSKQAVA YRQISLLLR PPGREAYPGD VFYLSRLLLE
301 RASRVSAEYV EKFTNGAVTG KTGSLTALPI IETQAGDVSA FVPTNVISIT
351 DGQIFLETSL FNAGIRPAVN AGISVSRVGG SAQTKIIKKL SGGIRTALAQ
401 YRELAAFAQF ASDLDEATRK QLEHGQRVTE LMKQKQYAPY SIADQAVSVY
451 ASNEGYMADV EVKKIVDFDA ALIAYFRSEY APLMKQIDET GDYNKDIEAA
501 IKAGIESFKA TQTY
    
```

Residue Number      Increasing Mass      Decreasing Mass

| Start - End | Observed | Mr(expt)  | Mr(calc)  | Delta   | Miss | Sequence                                                           |
|-------------|----------|-----------|-----------|---------|------|--------------------------------------------------------------------|
| 1 - 14      | 794.4136 | 1586.8127 | 1586.8338 | -0.0211 | 0    | -.MQQLNPSEISALIK.Q Oxidation (M) ( <a href="#">Ions score 74</a> ) |
| 95 - 107    | 689.3677 | 1376.7209 | 1376.8028 | -0.0819 | 0    | R.VLEVPVGPPELLGR.V ( <a href="#">Ions score 44</a> )               |
| 252 - 266   | 862.3844 | 1722.7541 | 1721.8472 | 0.9070  | 1    | R.DRGEDALIIYDDLK.Q ( <a href="#">Ions score 91</a> )               |
| 403 - 419   | 928.4010 | 1854.7874 | 1853.8795 | 0.9079  | 0    | R.ELAAFAQFASDLDEATR.K ( <a href="#">Ions score 87</a> )            |
| 465 - 477   | 757.3651 | 1512.7156 | 1512.7977 | -0.0821 | 0    | K.IVDFDAALIAEFR.S ( <a href="#">Ions score 24</a> )                |

Error: try setting browser cache to automatic.

Error: try setting browser cache to automatic.

---

AC B2I100; DT 14-APR-2009, integrated into UniProtKB/Swiss-Prot. DT 10-JUN-2008, sequence version 1. DT 27-JUL-2011, entry version 28. DE RecName: Full=ATP synthase subunit alpha; DE EC=3.6.3.14; DE AltName: Full=ATP synthase F1 sector subunit alpha; DE AltName: Full=F-ATPase subunit alpha; GN Name=atpA; OrderedLocusNames=ACICU\_00176; OS Acinetobacter baumannii (strain ACICU). OC Bacteria; Proteobacteria; Gammaproteobacteria; Pseudomonadales; OC Moraxellaceae; Acinetobacter; OC Acinetobacter calcoaceticus/baumannii complex. OX NCBI\_TaxID=405416; RN [1] RP NUCLEOTIDE SEQUENCE [LARGE SCALE GENOMIC DNA]. RC STRAIN=ACICU; RX PubMed=18411315; DOI=10.1128/AAC.01643-07; RA Iacono M., Villa L., Fortini D., Bordoni R., Imperi F., Bonnal R.J., RA Sicheritz-Ponten T., De Bellis G., Visca P., Cassone A., Carattoli A.; RT "Whole-genome pyrosequencing of an epidemic multidrug-resistant RT Acinetobacter baumannii strain belonging to the European clone II RT group."; RL Antimicrob. Agents Chemother. 52:2616-2625(2008). CC -!- FUNCTION: Produces ATP from ADP in the presence of a proton CC gradient across the membrane. The alpha chain is a regulatory CC subunit (By similarity). CC -!- CATALYTIC ACTIVITY: ATP + H(2)O + H(+)(In) = ADP + phosphate + CC H(+)(Out). CC -!- SUBUNIT: F-type ATPases have 2 components, CF(1) - the catalytic CC core - and CF(0) - the membrane proton channel. CF(1) has five CC subunits: alpha(3), beta(3), gamma(1), delta(1), epsilon(1). CF(0) CC has three main subunits: a(1), b(2) and c(9-12). The alpha and CC beta chains form an alternating ring which encloses part of the CC gamma chain. CF(1) is attached to CF(0) by a central stalk formed CC by the gamma and epsilon chains, while a peripheral stalk is CC formed by the delta and b chains (By similarity). CC -!- SUBCELLULAR LOCATION: Cell inner membrane; Peripheral membrane CC protein (By similarity). CC -!- SIMILARITY: Belongs to the ATPase alpha/beta chains family. CC ----- CC Copyrighted by the UniProt Consortium, see <http://www.uniprot.org/terms> CC Distributed under the Creative Commons Attribution-

NoDerivs License CC ----- DR EMBL;  
 CP000863; ACC55488.1; -; Genomic\_DNA. DR RefSeq; YP\_001844835.1; NC\_010611.1. DR ProteinModelPortal;  
 B2I100; -. DR SMR; B2I100; 26-511. DR STRING; B2I100; -. DR GeneID; 6236232; -. DR GenomeReviews;  
 CP000863\_GR; ACICU\_00176. DR KEGG; abc:ACICU\_00176; -. DR HOGENOM; HBG565875; -. DR OMA; GSDRDIK; -. DR  
 ProtClustDB; PRK09281; -. DR GO; GO:0005886; C:plasma membrane; IEA:UniProtKB-SubCell. DR GO; GO:0045261;  
 C:proton-transporting ATP synthase complex, catalytic core F(1); IEA:UniProtKB-KW. DR GO; GO:0005524; F:  
 ATP binding; IEA:UniProtKB-KW. DR GO; GO:0046933; F:hydrogen ion transporting ATP synthase activity,  
 rotational mechanism; IEA:InterPro. DR GO; GO:0046961; F:proton-transporting ATPase activity, rotational  
 mechanism; IEA:InterPro. DR GO; GO:0015991; P:ATP hydrolysis coupled proton transport; IEA:InterPro. DR  
 GO; GO:0015986; P:ATP synthesis coupled proton transport; IEA:InterPro. DR HAMAP; MF\_01346;  
 ATP\_synth\_alpha\_bact; 1; -. DR InterPro; IPR020003; ATPase\_a/bsu\_AS. DR InterPro; IPR005294; ATPase\_F1-  
 cplx\_asu. DR InterPro; IPR018118; ATPase\_F1/A1-cplx\_a/bsu\_N. DR InterPro; IPR023366; ATPase\_F1/A1-  
 cplx\_a\_su\_N. DR InterPro; IPR000793; ATPase\_F1/V1/A1-cplx\_a/bsu\_C. DR InterPro; IPR004100; ATPase\_F1/V1/A1-  
 cplx\_a/bsu\_N. DR InterPro; IPR000194; ATPase\_F1/V1/A1\_a/bsu\_nucl-bd. DR Gene3D; G3DSA:2.40.30.20;  
 G3DSA:2.40.30.20; 1. DR PANTHER; PTHR15184:SF3; ATPase\_F1\_a; 1. DR Pfam; PF00006; ATP-synt\_ab; 1. DR Pfam;  
 PF00306; ATP-synt\_ab\_C; 1. DR Pfam; PF02874; ATP-synt\_ab\_N; 1. DR SUPFAM; SSF47917; ATPase\_a/b\_C; 1. DR  
 SUPFAM; SSF50615; ATPase\_a/b\_N; 1. DR TIGRFAMS; TIGR00962; AtpA; 1. DR PROSITE; PS00152;  
 ATPASE\_ALPHA\_BETA; 1. PE 3: Inferred from homology; KW ATP synthesis; ATP-binding; Cell inner membrane;  
 Cell membrane; CF(1); KW Complete proteome; Hydrogen ion transport; Hydrolase; Ion transport; KW Membrane;  
 Nucleotide-binding; Transport. FT CHAIN 1 514 ATP synthase subunit alpha. FT /FTid=PRO\_1000143331. FT  
 NP\_BIND 170 177 ATP (By similarity). FT SITE 374 374 Required for activity (By similarity). SQ SEQUENCE  
 514 AA; 55397 MW; 63E4A57970B5A718 CRC64; MQQLNPSEIS ALIKQRIGDL DTSATAKNEG TIVMVSDGIV RIHGLADAMY  
 GEMIEFDGGL FGMALNLEQD SVGAVVLGNY LSLQEGQKAR CTGRVLEVPV GPELLGRVVD ALGNPIDGKG PIDAKLTDAV EKVAPGVIWR  
 QSVDPVQVTG YKSVDTMIPV GRGQRELIIG DRQTGKTAMA IDAIIAQKNS GIKCVYVAIG QKQSTIANVV RKLEETGAMA YTTVVAAAAA  
 DPAAMQYLAP YSGCTMGEYF RDRGEDALII YDDLKQAVA YRQISLLLR PPGREAYPGD VFYLHSRLLE RASRVSAEYV EKFTNGAVTG  
 KTGSLTALPI IETQAGDVSA FVPTNVISIT DGQIFLETSL FNAGIRPAVN AGISVSRVGG SAQTKIIKKL SGGIRTALAQ YRELAFAQF  
 ASDLDEATRK QLEHGQRVTE LMKQKQYAPY SIADQAVSVY ASNEGYMADV EVKKIVDFDA ALIAYFRSEY APLMKQIDET GDYNKDIEAA  
 IKAGIESFKA TQTY

Mascot: <http://www.matrixscience.com/>

# Mascot Search Results

## Protein View

Match to: **gi|126642748** Score: **63**  
**dihydrolipoamide dehydrogenase [Acinetobacter baumannii ATCC 17978]**  
 Found in search of C:\Temp\mas41.tmp

Nominal mass ( $M_r$ ): **42487**; Calculated pI value: **5.64**

NCBI BLAST search of [gi|126642748](#) against nr  
 Unformatted [sequence string](#) for pasting into other applications

Taxonomy: [Acinetobacter baumannii ATCC 17978](#)

Fixed modifications: Carbamidomethyl (C)  
 Variable modifications: Oxidation (M)  
 Cleavage by Trypsin: cuts C-term side of KR unless next residue is P  
 Sequence Coverage: **7%**

Matched peptides shown in **Bold Red**

```

1  MHHLADHGIT TGEVNFDLAK LLARKDKIVD QLTGGIDQLL KNGNIEWLKG
51  TGKLLAGKKV EFPHEGETQ ILEPKYVILA SGSVPVNIPV APVDQDIIVD
101 STGALNFPPEV PKRLGVIGAG VIGLELGSVW RRLGAEVVVF EAMDAFLPMA
151 DKALSKEYQK ILTKQGLDIR IGAKVSGTEV NGRETVKYT QAGEDKEQTF
201 DKLIVCVGRK AYAEGLLAED SGIKLTERGL VEVNDHCATS VEGVYAIGDL
251 VRGPMLAHKA MEEGVMAVER IHGHAQVNY DTIISVIYTH PEAAWVGLTE
301 EQAKEKGHEV KTGQFGFAVN GRALAAGEGA GFVKFVADAK TDRLLGMHVI
351 GPAASDIVHQ GMIALEFVSS VEDLQLMTEG TQHSLKLFMK LLLL
    
```

Residue Number      Increasing Mass      Decreasing Mass

| Start - End    | Observed        | Mr(expt)         | Mr(calc)         | Delta         | Miss     | Sequence                                                    |
|----------------|-----------------|------------------|------------------|---------------|----------|-------------------------------------------------------------|
| <b>28 - 41</b> | <b>756.9571</b> | <b>1511.8997</b> | <b>1511.8559</b> | <b>0.0438</b> | <b>0</b> | <b>K.IVDQLTGGIDQLLK.G</b> ( <a href="#">Ions score 18</a> ) |



59 - 75      661.0493    1980.1261    1979.0364      1.0897      1    K.KVEFVPHEGETQILEPK.Y    ([Ions score 46](#))

Error: try setting browser cache to automatic.

Error: try setting browser cache to automatic.

---

LOCUS YP\_001085732 394 aa linear BCT 29-MAY-2010 DEFINITION dihydrolipoamide dehydrogenase [Acinetobacter baumannii ATCC 17978]. ACCESSION YP\_001085732 VERSION YP\_001085732.1 GI:126642748 DBLINK Project: [58731](#) DBSOURCE REFSEQ: accession [NC\\_009085.1](#) KEYWORDS . SOURCE Acinetobacter baumannii ATCC 17978 ORGANISM [Acinetobacter baumannii ATCC 17978](#) Bacteria; Proteobacteria; Gammaproteobacteria; Pseudomonadales; Moraxellaceae; Acinetobacter; Acinetobacter calcoaceticus/baumannii complex. REFERENCE 1 (residues 1 to 394) AUTHORS Smith,M.G., Gianoulis,T.A., Pukatzki,S., Mekalanos,J.J., Ornston,L.N., Gerstein,M. and Snyder, M. TITLE New insights into Acinetobacter baumannii pathogenesis revealed by high-density pyrosequencing and transposon mutagenesis JOURNAL Genes Dev. 21 (5), 601-614 (2007) PUBMED [17344419](#) REFERENCE 2 (residues 1 to 394) CONSRTM NCBI Genome Project TITLE Direct Submission JOURNAL Submitted (05-MAR-2007) National Center for Biotechnology Information, NIH, Bethesda, MD 20894, USA REFERENCE 3 (residues 1 to 394) AUTHORS Smith,M.G., Gianoulis,T.A., Pukatzki,S., Mekalanos,J., Ornston,L.N., Gerstein,M. and Snyder,M. TITLE Direct Submission JOURNAL Submitted (27-NOV-2006) Department of Molecular, Cellular, and Developmental Biology, Yale University, 266 Whitney Ave, New Haven, CT 06520, USA COMMENT PROVISIONAL [REFSEQ](#): This record has not yet been subject to final NCBI review. The reference sequence was derived from [ABO13130](#). Source DNA and bacteria available from Michael Snyder (michael.snyder@yale.edu). Method: conceptual translation. FEATURES Location/Qualifiers source 1..394 /organism="Acinetobacter baumannii ATCC 17978" /strain="ATCC 17978" /db\_xref="ATCC:[17978](#)" /db\_xref="taxon:[400667](#)" [Protein](#) 1..394 /product="dihydrolipoamide dehydrogenase" /calculated\_mol\_wt=42269 [Region](#) 2..380 /region\_name="PRK06467" /note="dihydrolipoamide dehydrogenase; Reviewed" /db\_xref="CDD:[180579](#)" [Region](#) 113..194 /region\_name="Pyr\_redox" /note="Pyridine nucleotide-disulphide oxidoreductase; c114644" /db\_xref="CDD:[197445](#)" [Region](#) 285..379 /region\_name="Pyr\_redox\_dim" /note="Pyridine nucleotide-disulphide oxidoreductase, dimerisation domain; pfam02852" /db\_xref="CDD:[190451](#)" [CDS](#) 1..394 /locus\_tag="A1S\_2717" /coded\_by="NC\_009085.1:3153037..3154221" /note="E3 component of 2-oxoglutarate dehydrogenase complexGlycine oxidation system L-factor" /transl\_table=[11](#) /db\_xref="GeneID:[4919320](#)"

Mascot: <http://www.matrixscience.com/>



# Mascot Search Results

## Protein View

Match to: **MDH\_ACIBC** Score: **316**

**Malate dehydrogenase OS=Acinetobacter baumannii (strain ACICU) GN=mdh PE=3 SV=1**

Found in search of C:\Temp\mas93.tmp

Nominal mass ( $M_r$ ): **35358**; Calculated pI value: **5.20**

NCBI BLAST search of [MDH\\_ACIBC](#) against nr

Unformatted [sequence string](#) for pasting into other applications

Taxonomy: [Acinetobacter baumannii ACICU](#)

Fixed modifications: Carbamidomethyl (C)

Variable modifications: Oxidation (M)

Cleavage by Trypsin: cuts C-term side of KR unless next residue is P

Sequence Coverage: **21%**

Matched peptides shown in **Bold Red**

```

1  MKQPVRVAVT GAAGQIGYSL LFRIASGEML GKDQPVIQL LEVPVEKAQQ
51  ALKGVMMELD DCAFPLLAGM IGTDDPKVAF KDADYALLVG SRPRGPGMER
101 ADLLKVNGEI FIGQGQALNE VASRDVKVLV VGNPANTNAY IAMKSAPDLP
151 AKNFTAMLRL DHNRALTQVA QKAGVAVADI EKLTWVGNHS PTMYADYRFA
201 TANGESLKDK INDPAWNKDV FLPTVGKRGV AIIEARGLSS AASAANAID
251 HMRDWALGTN GKWVTMGVPS DGSYGIPEGV MFGFPVTTEN GEYKIVQGLE
301 IDEFSRERIN FTLNELEER AAIADMVK
    
```

Residue Number      Increasing Mass      Decreasing Mass

| Start - End    | Observed        | Mr(expt)         | Mr(calc)         | Delta          | Miss     | Sequence                                                    |
|----------------|-----------------|------------------|------------------|----------------|----------|-------------------------------------------------------------|
| <b>33 - 47</b> | <b>860.4943</b> | <b>1718.9741</b> | <b>1718.9818</b> | <b>-0.0078</b> | <b>0</b> | <b>K.DQPVIQLLEVPVEK.A</b> ( <a href="#">Ions score 44</a> ) |
| <b>82 - 94</b> | <b>716.8854</b> | <b>1431.7562</b> | <b>1431.7470</b> | <b>0.0092</b>  | <b>0</b> | <b>K.DADYALLVGSRPR.G</b> ( <a href="#">Ions score 61</a> )  |

|                                   |          |           |           |        |   |                      |                                   |
|-----------------------------------|----------|-----------|-----------|--------|---|----------------------|-----------------------------------|
| 237 - 253                         | 829.9066 | 1657.7986 | 1657.7842 | 0.0145 | 0 | R.GLSSAASAANAIDHMR.D | Oxidation (M)                     |
| ( <a href="#">Ions score 59</a> ) |          |           |           |        |   |                      |                                   |
| 295 - 306                         | 703.3758 | 1404.7371 | 1404.7249 | 0.0122 | 0 | K.IVQGLEIDEFSR.E     | ( <a href="#">Ions score 73</a> ) |
| 309 - 320                         | 753.8813 | 1505.7481 | 1505.7361 | 0.0120 | 0 | R.INFTLNELEEER.A     | ( <a href="#">Ions score 80</a> ) |

Error: try setting browser cache to automatic.

Error: try setting browser cache to automatic.

---

AC B2HZ52; DT 14-APR-2009, integrated into UniProtKB/Swiss-Prot. DT 10-JUN-2008, sequence version 1. DT 27-JUL-2011, entry version 27. DE RecName: Full=Malate dehydrogenase; DE EC=1.1.1.37; GN Name=mdh; OrderedLocusNames=ACICU\_03222; OS Acinetobacter baumannii (strain ACICU). OC Bacteria; Proteobacteria; Gammaproteobacteria; Pseudomonadales; OC Moraxellaceae; Acinetobacter; OC Acinetobacter calcoaceticus/baumannii complex. OX NCBI\_TaxID=405416; RN [1] RP NUCLEOTIDE SEQUENCE [LARGE SCALE GENOMIC DNA]. RC STRAIN=ACICU; RX PubMed=18411315; DOI=10.1128/AAC.01643-07; RA Iacono M., Villa L., Fortini D., Bordoni R., Imperi F., Bonnal R.J., RA Sicheritz-Ponten T., De Bellis G., Visca P., Cassone A., Carattoli A.; RT "Whole-genome pyrosequencing of an epidemic multidrug-resistant RT Acinetobacter baumannii strain belonging to the European clone II RT group."; RL Antimicrob. Agents Chemother. 52:2616-2625(2008). CC -!- FUNCTION: Catalyzes the reversible oxidation of malate to CC oxaloacetate (By similarity). CC -!- CATALYTIC ACTIVITY: (S)-malate + NAD(+) = oxaloacetate + NADH. CC -!- SUBUNIT: Homodimer (By similarity). CC -!- SIMILARITY: Belongs to the LDH/MDH superfamily. MDH type 2 family. CC

----- CC Copyrighted by the UniProt Consortium, see <http://www.uniprot.org/terms> CC Distributed under the Creative Commons Attribution-NoDerivs License CC ----- DR EMBL; CP000863; ACC58534.1; -; Genomic\_DNA. DR RefSeq; YP\_001847881.1; NC\_010611.1. DR ProteinModelPortal; B2HZ52; -. DR SMR; B2HZ52; 2-327. DR STRING; B2HZ52; -. DR GeneID; 6234431; -. DR GenomeReviews; CP000863\_GR; ACICU\_03222. DR KEGG; abc:ACICU\_03222; -. DR HOGENOM; HBG289884; -. DR OMA; MIIWGNH; -. DR ProtClustDB; PRK05442; -. DR GO; GO:0005488; F:binding; IEA:InterPro. DR GO; GO:0030060; F:L-malate dehydrogenase activity; IEA:EC. DR GO; GO:0044262; P:cellular carbohydrate metabolic process; IEA:InterPro. DR GO; GO:0006108; P:malate metabolic process; IEA:InterPro. DR GO; GO:0006099; P:tricarboxylic acid cycle; IEA:UniProtKB-KW. DR HAMAP; MF\_01517; Malate\_dehydrog\_2; 1; -. DR InterPro; IPR001557; L-lactate/malate\_DH. DR InterPro; IPR022383; Lactate/malate\_DH\_C. DR InterPro; IPR001236; Lactate/malate\_DH\_N. DR InterPro; IPR015955; Lactate\_DH/Glyco\_Ohase\_4\_C. DR InterPro; IPR010945; Malate\_DH\_type2. DR InterPro; IPR016040; NAD(P)-bd\_dom. DR Gene3D; G3DSA:3.90.110.10; lact\_mal\_DH; 1. DR Gene3D;

G3DSA:3.40.50.720; NAD(P)-bd; 1. DR PANTHER; PTHR23382; MDH\_SF1; 1. DR Pfam; PF02866; Ldh\_1\_C; 1. DR Pfam; PF00056; Ldh\_1\_N; 1. DR PIRSF; PIRSF000102; Lac\_mal\_DH; 1. DR SUPFAM; SSF56327; Lactate\_DH/ Glyco\_hydro\_4\_C; 1. DR TIGRFAMs; TIGR01759; MalateDH-SF1; 1. DR PROSITE; PS00068; MDH; FALSE\_NEG. PE 3: Inferred from homology; KW Complete proteome; NAD; Oxidoreductase; Tricarboxylic acid cycle. FT CHAIN 1 328 Malate dehydrogenase. FT /FTid=PRO\_1000191605. FT NP\_BIND 11 17 NAD (By similarity). FT NP\_BIND 131 133 NAD (By similarity). FT ACT\_SITE 189 189 Proton acceptor (By similarity). FT BINDING 94 94 Substrate (By similarity). FT BINDING 100 100 Substrate (By similarity). FT BINDING 107 107 NAD (By similarity). FT BINDING 114 114 NAD (By similarity). FT BINDING 133 133 Substrate (By similarity). FT BINDING 164 164 Substrate (By similarity). SQ SEQUENCE 328 AA; 35323 MW; 4A3ABDD04F615F6E CRC64; MKQPVRVAVT GAAGQIGYSL LFRIASGEML GKDQPVILQL LEVPVEKAQQ ALKGVMELD DCAFPLLAGM IGTDDPKVAF KDADYALLVG SRPRGPGMER ADLLKVNGEI FIGQGQALNE VASRDVKVLV VGNPANTNAY IAMKSAPDLP AKNFTAMLRL DHNRALTQVA QKAGVAVADI EKLTWVGNHS PTMYADYRFA TANGESLKDK INDPAWNKDV FLPTVGKRG AII EARGLSS AASAANAID HMRDWALGTN GKWVTMGVPS DGSYGIPEGV MFGFPVTTEN GEYKIVQGLE IDEFSRERIN FTLNELEER AAIADMVK

**Mascot:** <http://www.matrixscience.com/>

# Mascot Search Results

## Protein View

Match to: [gi|260549007](#) Score: 276

**pyruvate/2-oxoglutarate dehydrogenase complex [Acinetobacter sp. RUH2624]**

Found in search of C:\Temp\mas35.tmp

Nominal mass ( $M_r$ ): **51197**; Calculated pI value: **5.96**

NCBI BLAST search of [gi|260549007](#) against nr

Unformatted [sequence string](#) for pasting into other applications

Taxonomy: [Acinetobacter sp. RUH2624](#)

Links to retrieve other entries containing this sequence from NCBI Entrez:

[gi|260408175](#) from [Acinetobacter sp. RUH2624](#)

Fixed modifications: Carbamidomethyl (C)

Variable modifications: Oxidation (M)

Cleavage by Trypsin: cuts C-term side of KR unless next residue is P

Sequence Coverage: **15%**

Matched peptides shown in **Bold Red**

```

1  MSQQFDLVVI GGPGGYEAA IRAAQLGFKV ACIEKRIHNG KPSLGGTCLN
51 VGCIPSKALL DSSHRYEDTV HHLADHGITT GEVNFDLAKL LARKDKIVDQ
101 LTGGIDQLLK GNGIEWLKGT GKLLAGKKVE FVSHEGETQV LEPKYVILAS
151 GSVPVNIIPVA PVDQDIIVDS TGALNFPEVP KRLGVIGAGV IGLELGSVWR
201 RLGAEVVVFEE AMDAFLPMAD KALAKEYQKL LTKQGLDIRV GAKVSGTEVN
251 GREVTVKYTQ GGEEKTQTFD KLIVCVGRKA YAEGLLAEDS GIKLTERGLV
301 EVNDHCATSV EGVYAIGDLV RGPMLAHKAM EEGVMAVERI HGHAQVNYD
351 TIISVIYTHP EAAWVGLTEE QAKEKGHEVK TGQFGFAVNG RALAAGEGAG
401 FVKFVADAKT DRLLGMHVIG PAASDIVHQG MIALEFVSSV EDLQLMTFGH
451 PTFSEVVHEA ALAVDGRAIH AIQRKRK
    
```

Residue Number      Increasing Mass      Decreasing Mass

| Start - End | Observed  | Mr(expt)  | Mr(calc)  | Delta   | Miss | Sequence                                                       |
|-------------|-----------|-----------|-----------|---------|------|----------------------------------------------------------------|
| 2 - 22      | 1068.0567 | 2134.0988 | 2133.0855 | 1.0133  | 0    | M.SQQFDLVVIGGGPGGYEAAIR.A ( <a href="#">Ions score 59</a> )    |
| 66 - 89     | 895.0897  | 2682.2471 | 2681.2722 | 0.9750  | 0    | R.YEDTVHHLADHGITTGEVNFDLAK.L ( <a href="#">Ions score 57</a> ) |
| 95 - 110    | 878.4802  | 1754.9459 | 1754.9778 | -0.0319 | 1    | K.DKIVDQLTGGIDQLLK.G ( <a href="#">Ions score 57</a> )         |
| 97 - 110    | 757.4523  | 1512.8901 | 1511.8559 | 1.0342  | 0    | K.IVDQLTGGIDQLLK.G ( <a href="#">Ions score 33</a> )           |
| 279 - 293   | 782.4311  | 1562.8477 | 1563.8144 | -0.9667 | 1    | R.KAYAEGLLAEDSGIK.L ( <a href="#">Ions score 22</a> )          |
| 280 - 293   | 718.9245  | 1435.8345 | 1435.7194 | 0.1151  | 0    | K.AYAEGLLAEDSGIK.L ( <a href="#">Ions score 49</a> )           |

Error: try setting browser cache to automatic.

Error: try setting browser cache to automatic.

---

LOCUS ZP\_05823229 477 aa linear BCT 09-JUN-2010 DEFINITION pyruvate/2-oxoglutarate dehydrogenase complex [Acinetobacter sp. RUH2624]. ACCESSION ZP\_05823229 VERSION ZP\_05823229.1 GI:260549007 DBLINK Project: [40849](#) DBSOURCE REFSEQ: accession [NZ\\_GG704495.1](#) KEYWORDS . SOURCE Acinetobacter sp. RUH2624 ORGANISM [Acinetobacter sp. RUH2624](#) Bacteria; Proteobacteria; Gammaproteobacteria; Pseudomonadales; Moraxellaceae; Acinetobacter; Acinetobacter calcoaceticus/baumannii complex. REFERENCE 1 (residues 1 to 477) AUTHORS Ward, D., Feldgarden, M., Earl, A., Young, S.K., Zeng, Q., Koehrsen, M., Alvarado, L., Berlin, A., Bochicchio, J., Borenstein, D., Chapman, S., Chen, Z., Engels, R., Freedman, E., Gellesch, M., Goldberg, J., Griggs, A., Gujja, S., Heilman, E., Heiman, D., Hepburn, T., Howarth, C., Jen, D., Larson, L., Lewis, B., Mehta, T., Park, D., Pearson, M., Roberts, A., Saif, S., Shea, T., Shenoy, N., Sisk, P., Stolte, C., Sykes, S., Thomson, T., Walk, T., White, J., Yandava, C., Dijkshoorn, L., Haas, B., Nusbaum, C. and Birren, B. CONSRTM The Broad Institute Genome Sequencing Platform TITLE The Genome Sequence of Acinetobacter sp. strain RUH2624 JOURNAL Unpublished REFERENCE 2 (residues 1 to 477) AUTHORS Ward, D., Feldgarden, M., Earl, A., Young, S.K., Zeng, Q., Koehrsen, M., Alvarado, L., Berlin, A., Bochicchio, J., Borenstein, D., Chapman, S., Chen, Z., Engels, R., Freedman, E., Gellesch, M., Goldberg, J., Griggs, A., Gujja, S., Heilman, E., Heiman, D., Hepburn, T., Howarth, C., Jen, D., Larson, L., Lewis, B., Mehta, T., Park, D., Pearson, M., Roberts, A., Saif, S., Shea, T., Shenoy, N., Sisk, P., Stolte, C., Sykes, S., Thomson, T., Walk, T., White, J., Yandava, C., Dijkshoorn, L., Haas, B., Nusbaum, C. and Birren, B. CONSRTM The Broad Institute Genome Sequencing Platform TITLE Direct Submission JOURNAL Submitted (19-AUG-2009) Broad Institute of MIT and Harvard, 7 Cambridge Center, Cambridge, MA 02142, USA COMMENT PREDICTED [REFSEQ](#): This

record has not been reviewed and the function is unknown. The reference sequence was derived from [EEX01646](#). Method: conceptual translation. FEATURES Location/Qualifiers source 1..477 / organism="Acinetobacter sp. RUH2624" /strain="RUH2624" /db\_xref="taxon:[575564](#)" [Protein](#) 1..477 / product="pyruvate/2-oxoglutarate dehydrogenase complex" /calculated\_mol\_wt=50813 [Region](#) 1..477 / region\_name="PRK06467" /note="dihydrolipoamide dehydrogenase; Reviewed" /db\_xref="CDD:[180579](#)" [Region](#) 5..>154 /region\_name="Pyr\_redox" /note="Pyridine nucleotide-disulphide oxidoreductase; cl14644" /db\_xref="CDD:[197445](#)" [Region](#) 182..263 /region\_name="Pyr\_redox" /note="Pyridine nucleotide-disulphide oxidoreductase; cl14644" /db\_xref="CDD:[197445](#)" [Region](#) 354..461 /region\_name="Pyr\_redox\_dim" /note="Pyridine nucleotide-disulphide oxidoreductase, dimerisation domain; pfam02852" /db\_xref="CDD:[190451](#)" [CDS](#) 1..477 /locus\_tag="HMPREF0014\_00243" /coded\_by="NZ\_GG704495.1:262130..263563" /transl\_table=[11](#)

**Mascot:** <http://www.matrixscience.com/>



# Mascot Search Results

## Protein View

Match to: **gi|169632322** Score: **90**  
**coproporphyrinogen III oxidase [Acinetobacter baumannii SDF]**  
 Found in search of C:\Temp\mas82.tmp

Nominal mass ( $M_r$ ): **38638**; Calculated pI value: **5.27**

NCBI BLAST search of [gi|169632322](#) against nr  
 Unformatted [sequence string](#) for pasting into other applications

Taxonomy: [Acinetobacter baumannii SDF](#)

Links to retrieve other entries containing this sequence from NCBI Entrez:  
[gi|169151114](#) from [Acinetobacter baumannii](#)

Fixed modifications: Carbamidomethyl (C)

Variable modifications: Oxidation (M)

Cleavage by Trypsin: cuts C-term side of KR unless next residue is P

Sequence Coverage: **6%**

Matched peptides shown in **Bold Red**

```

1 MDLCFDVSNL FRSSLRVIMQ HPTSTDIQRV REFLLDLQAR ICAGLEQQEK
51 AGGGTAEFII DDWERPEGGG GRSRVLQNGT VIEKGGVMFS HINISKLPPS
101 ATERHPQIAG AKAQALGVSL VIHPKNPNIPT SHANVRLFV AEREGQDPIW
151 WFGGGFDLTP FYPDDQDVLN WHQAAYDLCK PFGDNVYAEH KKWCCDDYFYL
201 KHGDEQRGVG GLFFDDLNCW DFETCFKYIQ AVGNGLYNAI LPIFEKHREQ
251 PYTEAQREFQ LYRRGRYVEY NLVYDRGTLF GLQTGGRIES ILVSLPNLAA
301 WSYRPEWDED SPEKRLTDYY LKPRDWLGLE EKVA
    
```

Residue Number      Increasing Mass      Decreasing Mass

**Start - End      Observed      Mr(expt)      Mr(calc)      Delta      Miss Sequence**

85 - 96 653.3461 1304.6777 1304.6547 0.0230 0 K.GGVFMFSHINISK.L Oxidation (M) ([Ions score 50](#))

277 - 287 553.8227 1105.6308 1105.5880 0.0428 0 R.GTLFGLQTGGR.I ([Ions score 40](#))

Error: try setting browser cache to automatic.

Error: try setting browser cache to automatic.

---

LOCUS YP\_001706058 334 aa linear BCT 17-MAY-2011 DEFINITION coproporphyrinogen III oxidase [Acinetobacter baumannii SDF]. ACCESSION YP\_001706058 VERSION YP\_001706058.1 GI:169632322 DBLINK Project: [61601](#) DBSOURCE REFSEQ: accession [NC\\_010400.1](#) KEYWORDS . SOURCE Acinetobacter baumannii SDF ORGANISM [Acinetobacter baumannii SDF](#) Bacteria; Proteobacteria; Gammaproteobacteria; Pseudomonadales; Moraxellaceae; Acinetobacter; Acinetobacter calcoaceticus/baumannii complex. REFERENCE 1 (residues 1 to 334) AUTHORS Vallenet,D., Nordmann,P., Barbe,V., Poirel,L., Mangenot,S., Bataille,E., Dossat,C., Gas,S., Kreimeyer,A., Lenoble,P., Oztas,S., Poulain,J., Segurens,B., Robert,C., Abergel,C., Claverie,J.M., Raoult,D., Medigue, C., Weissenbach,J. and Cruveiller,S. TITLE Comparative analysis of Acinetobacters: three genomes for three lifestyles JOURNAL PLoS ONE 3 (3), E1805 (2008) PUBMED [18350144](#) REMARK Publication Status: Online-Only REFERENCE 2 (residues 1 to 334) CONSRTM NCBI Genome Project TITLE Direct Submission JOURNAL Submitted (04-MAR-2008) National Center for Biotechnology Information, NIH, Bethesda, MD 20894, USA REFERENCE 3 (residues 1 to 334) AUTHORS Genoscope -,C.E.A. TITLE Direct Submission JOURNAL Submitted (25-FEB-2008) Genoscope - Centre National de Sequencage : BP 191 91006 EVRY cedex - FRANCE (E-mail : [seqref@genoscope.cns.fr](mailto:seqref@genoscope.cns.fr) - Web : [www.genoscope.cns.fr](http://www.genoscope.cns.fr)) COMMENT PROVISIONAL REFSEQ: This record has not yet been subject to final NCBI review. The reference sequence was derived from [CAO99780](#). Annotation data relative to BLAST similarities, COG assignments, enzymatic function prediction (PRIAM software), TMHMM and SignalP predictions, and synteny results (Syntonzizer software) are available in BaumannoScope database via the MaGe annotation system <http://www.genoscope.cns.fr/agc/mage/baumannoscope>. Method: conceptual translation. FEATURES Location/Qualifiers source 1..334 /organism="Acinetobacter baumannii SDF" /strain="SDF" /db\_xref="taxon:[509170](#)" [Protein](#) 1..334 /product="coproporphyrinogen III oxidase" /EC\_number="[1.3.3.3](#)" /function="1.5.3.12 : heme, porphyrine" /calculated\_mol\_wt=38189 [Region](#) 28..327 /region\_name="Coproge<sub>n</sub> oxidas" /note="Coproporphyrinogen III oxidase; cl00433" /db\_xref="CDD:[193817](#)" [CDS](#) 1..334 /gene="hemF" /locus\_tag="ABSDF0387" /coded\_by="complement(NC\_010400.1:365545..366549)" /inference="ab initio prediction:AMIGene:2.0" /note="catalyzes the conversion of the propionic acid groups of rings I and III to vinyl groups during heme synthesis" /transl\_table=[11](#) /db\_xref="GeneID:[5986562](#)"

**Mascot:** <http://www.matrixscience.com/>

**Mascot Search Results**

**Protein View**

Match to: **RL10\_ACIB3** Score: **151**  
**50S ribosomal protein L10 OS=Acinetobacter baumannii (strain AB307-0294) GN=rplJ PE=3 SV=1**  
 Found in search of C:\DOCUME~1\ADMINI~1\LOCALS~1\Temp\mas5.tmp

Nominal mass (M<sub>r</sub>): **18079**; Calculated pI value: **5.62**  
 NCBI BLAST search of [RL10\\_ACIB3](#) against nr  
 Unformatted [sequence string](#) for pasting into other applications

Taxonomy: [Acinetobacter baumannii AB307-0294](#)

Fixed modifications: Carbamidomethyl (C)  
 Variable modifications: Oxidation (M)  
 Cleavage by Trypsin: cuts C-term side of KR unless next residue is P  
 Sequence Coverage: **16%**

Matched peptides shown in **Bold Red**

**1** MALLIEDK**KQ IVAEVSEVAS** KAFAAVVADY QGLSVEQLTT LRVEARKLGV  
**51** TTRIVRNTLA KRAFQGTQFD ILNDNLVGPT ILGFSTSEDD MGAAARLFEE  
**101** FAKTNKAFEL KAAAFDGKVY QGADVSVIAN LPNQEK**ALTM LASVLQAPIS**  
**151** KLGRLITALK EKNESEEA

Show predicted peptides also

Sort Peptides By  Residue Number  Increasing Mass  Decreasing Mass

| Start - End | Observed | Mr (expt) | Mr (calc) | Delta  | Miss | Sequence                                              |
|-------------|----------|-----------|-----------|--------|------|-------------------------------------------------------|
| 9 - 21      | 694.4112 | 1386.8079 | 1386.7718 | 0.0360 | 1    | K.KQIVAEVSEVASK.A ( <a href="#">Ions score 81</a> )   |
| 137 - 151   | 772.4795 | 1542.9445 | 1541.8851 | 1.0595 | 0    | K.ALTMLASVLQAPISK.L ( <a href="#">Ions score 70</a> ) |

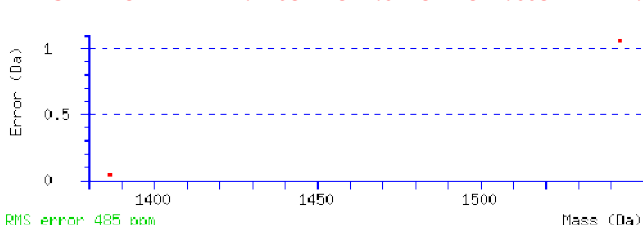

Error Distribution (ppm)

ID RL10\_ACIB3 Reviewed; 168 AA.  
 AC B7H1K0;  
 DT 14-APR-2009, integrated into UniProtKB/Swiss-Prot.  
 DT 10-FEB-2009, sequence version 1.  
 DT 02-MAR-2010, entry version 10.  
 DE RecName: Full=50S ribosomal protein L10;  
 GN Name=rplJ; OrderedLocusNames=ABBFA\_003250;  
 OS Acinetobacter baumannii (strain AB307-0294).  
 OC Bacteria; Proteobacteria; Gammaproteobacteria; Pseudomonadales;  
 OC Moraxellaceae; Acinetobacter.  
 OX NCBI\_TaxID=557600;  
 RN [1]  
 RP NUCLEOTIDE SEQUENCE [LARGE SCALE GENOMIC DNA].  
 RX PubMed=18931120; DOI=10.1128/JB.00834-08;  
 RA Adams M.D., Goglin K., Molyneaux N., Hujer K.M., Lavender H.,  
 RA Jamison J.J., MacDonald I.J., Martin K.M., Russo T., Campagnari A.A.,  
 RA Hujer A.M., Bonomo R.A., Gill S.R.;  
 RT "Comparative genome sequence analysis of multidrug-resistant  
 RT Acinetobacter baumannii."  
 RL J. Bacteriol. 190:8053-8064(2008).  
 CC !- SIMILARITY: Belongs to the ribosomal protein L10P family.  
 CC -----  
 CC Copyrighted by the UniProt Consortium, see http://www.uniprot.org/terms  
 CC Distributed under the Creative Commons Attribution-NoDerivs License  
 CC -----  
 DR EMBL; CP001172; ACJ56249.1; -; Genomic\_DNA.  
 DR RefSeq; YP\_002327131.1; -.  
 DR SMR; B7H1K0; 1-158.  
 DR GeneID; 7059301; -.  
 DR GenomeReviews; CP001172\_GR; ABBFA\_003250.  
 DR KEGG; abb:ABBFA\_003250; -.  
 DR HOGENOM; HBG597359; -.

DR OMA; AKANDKF; -.  
 DR ProtClustDB; PRK00099; -.  
 DR GO; GO:0005840; C:ribosome; IEA:UniProtKB-K .  
 DR GO; GO:0003735; F:structural constituent of ribosome; IEA:InterPro.  
 DR GO; GO:0042254; P:ribosome biogenesis; IEA:InterPro.  
 DR GO; GO:0006412; P:translation; IEA:HAMAP.  
 DR HAMAP; MF\_00362; Ribosomal\_L10; 1; -.  
 DR InterPro; IPR001790; Ribosomal\_L10.  
 DR InterPro; IPR002363; Ribosomal\_L10\_eubac\_CS.  
 DR Pfam; PF00466; Ribosomal\_L10; 1.  
 DR PROSITE; PS01109; RIBOSOMAL\_L10; 1.  
 PE 3: Inferred from homology;  
 K Complete proteome; Ribonucleoprotein; Ribosomal protein.  
 FT CHAIN 1 168 50S ribosomal protein L10.  
 FT /FTId=PRO\_1000120899.  
 SQ SEQUENCE 168 AA; 18090 M ; C4B9A576F0BA5EA3 CRC64;  
 MALLIEDKKQ IVAEVSEVAS KAFAAVVADY QGLSVEQLTT LRVEARKLGV TTRIVRNTLA  
 KRAFQGTQFD ILNDNLVGPT ILGFSTSEDD MGAAARLFEE FAKTNKAFEL KAAAFDGKVY  
 QGADVSVIAN LPNQEKALTM LASVLQAPIS KLGRLITALK EKNESEEA

Mascot <http://www.matrix-science.com/>

# Mascot Search Results

## Protein View

Match to: **RS1\_ECO57** Score: **117**

**30S ribosomal protein S1 OS=Escherichia coli O157:H7 GN=rpsA PE=3 SV=1**

Found in search of C:\Temp\mas32.tmp

Nominal mass ( $M_r$ ): **61235**; Calculated pI value: **4.89**

NCBI BLAST search of [RS1\\_ECO57](#) against nr

Unformatted [sequence string](#) for pasting into other applications

Taxonomy: [Escherichia coli O157:H7](#)

Fixed modifications: Carbamidomethyl (C)

Variable modifications: Oxidation (M)

Cleavage by Trypsin: cuts C-term side of KR unless next residue is P

Sequence Coverage: **2%**

Matched peptides shown in **Bold Red**

```

1 MTESFAQLFE ESLKEIETRP GSIVRGVVVA IDKDVVLVDA GLKSESAIPA
51 EQFKNAQGEL EIQVGDEV DV ALDAVEDGFG ETLLSREKAK RHEAWITLEK
101 AYEDAETVTG VINGKVKGGF TVELNGIRAF LPGSLVDVRP VRDTLHLEGK
151 ELEFKVIKLD QKRNNVVVSR RAVIESENSA ERDQLLENLQ EGMEVKGIVK
201 NLTDYGAFVD LGGVDGLLHI TDMAWKRVKH PSEIVNVGDE ITVKVLKFDR
251 ERTRVSLGLK QLGEDPWVAI AKRYPEGTKL TGRVTNLTDY GCFVEIEEGV
301 EGLVHVSEMD WTNKNIHPSK VVNVGDVVEV MVL DIDEERR RISLGLKQCK
351 ANPWQQFAET HNKGD RVEGK IKSITDFGIF IGLDGGIDGL VHLSDISWNV
401 AGE EAVREYK KGDEIAAVVL QVDAERERIS LGVKQLAEDP FNNWVALNKK
451 GAIVTGKVTA VDAKGATVEL ADGVEGYLRA SEASRDRVED ATLVLSVGDE
501 VEA KFTGVDR KNRAISLSVR AKDEADEKDA IATV NKQEDA NFSNNAMAEA
551 FKA AKGE
    
```

Residue Number      Increasing Mass      Decreasing Mass

| Start - End | Observed | Mr(expt)  | Mr(calc)  | Delta   | Miss | Sequence                                                            |
|-------------|----------|-----------|-----------|---------|------|---------------------------------------------------------------------|
| 1 - 14      | 838.3633 | 1674.7120 | 1674.7811 | -0.0690 | 0    | -.MTESFAQLFEEESLK.E Oxidation (M) ( <a href="#">Ions score 39</a> ) |
| 2 - 14      | 764.8559 | 1527.6972 | 1527.7457 | -0.0485 | 0    | M.TESFAQLFEEESLK.E ( <a href="#">Ions score 77</a> )                |

Error: try setting browser cache to automatic.

Error: try setting browser cache to automatic.

---

AC P0AG69; P02349; P77352; DT 21-JUL-1986, integrated into UniProtKB/Swiss-Prot. DT 20-DEC-2005, sequence version 1. DT 31-MAY-2011, entry version 39. DE RecName: Full=30S ribosomal protein S1; GN Name=rpsA; OrderedLocusNames=Z1257, ECs0994; OS Escherichia coli O157:H7. OC Bacteria; Proteobacteria; Gammaproteobacteria; Enterobacteriales; OC Enterobacteriaceae; Escherichia. OX NCBI\_TaxID=83334; RN [1] RP NUCLEOTIDE SEQUENCE [LARGE SCALE GENOMIC DNA]. RC STRAIN=O157:H7 / EDL933 / ATCC 700927 / EHEC; RX MEDLINE=21074935; PubMed=11206551; DOI=10.1038/35054089; RA Perna N.T., Plunkett G. III, Burland V., Mau B., Glasner J.D., RA Rose D.J., Mayhew G.F., Evans P.S., Gregor J., Kirkpatrick H.A., RA Posfai G., Hackett J., Klink S., Boutin A., Shao Y., Miller L., RA Grotbeck E.J., Davis N.W., Lim A., Dimalanta E.T., Potamosis K., RA Apodaca J., Anantharaman T.S., Lin J., Yen G., Schwartz D.C., RA Welch R.A., Blattner F. R.; RT "Genome sequence of enterohaemorrhagic Escherichia coli O157:H7."; RL Nature 409:529-533(2001). RN [2] RP NUCLEOTIDE SEQUENCE [LARGE SCALE GENOMIC DNA]. RC STRAIN=O157:H7 / Sakai / RIMD 0509952 / EHEC; RX MEDLINE=21156231; PubMed=11258796; DOI=10.1093/dnares/8.1.11; RA Hayashi T., Makino K., Ohnishi M., Kurokawa K., Ishii K., Yokoyama K., RA Han C.-G., Ohtsubo E., Nakayama K., Murata T., Tanaka M., Tobe T., RA Iida T., Takami H., Honda T., Sasakawa C., Ogasawara N., Yasunaga T., RA Kuhara S., Shiba T., Hattori M., Shinagawa H.; RT "Complete genome sequence of enterohemorrhagic Escherichia coli RT O157:H7 and genomic comparison with a laboratory strain K-12."; RL DNA Res. 8:11-22(2001). CC -!- FUNCTION: Binds mRNA; thus facilitating recognition of the CC initiation point. It is needed to translate mRNA with a short CC Shine-Dalgarno (SD) purine-rich sequence (By similarity). CC -!- SUBUNIT: Part of the 30S ribosomal subunit. Some nascent CC polypeptide chains are able to cross-link to this protein in situ. CC Can be cross-linked to mRNA in the ribosome (By similarity). CC -!- PTM: Phosphorylated; probably on a serine (By similarity). CC -!- SIMILARITY: Belongs to the ribosomal protein S1P family. CC -!- SIMILARITY: Contains 6 S1 motif domains. CC ----- CC Copyrighted by the UniProt Consortium, see <http://www.uniprot.org/terms> CC Distributed under the Creative Commons Attribution-NoDerivs License CC

----- DR EMBL; AE005174; AAG55396.1; -;  
 Genomic\_DNA. DR EMBL; BA000007; BAB34417.1; -; Genomic\_DNA. DR PIR; B90753; B90753. DR PIR; H85616;  
 H85616. DR RefSeq; NP\_286786.1; NC\_002655.2. DR RefSeq; NP\_309021.1; NC\_002695.1. DR ProteinModelPortal;  
 P0AG69; -. DR SMR; P0AG69; 16-89, 103-180, 184-262, 270-350, 360-521. DR PRIDE; P0AG69; -. DR  
 EnsemblBacteria; EBESCT00000026434; EBESCP00000025327; EBESCG00000025487. DR EnsemblBacteria;  
 EBESCT00000056562; EBESCP00000054390; EBESCG00000055610. DR GeneID; 917736; -. DR GeneID; 958873; -. DR  
 GenomeReviews; AE005174\_GR; Z1257. DR GenomeReviews; BA000007\_GR; ECs0994. DR KEGG; ece:Z1257; -. DR KEGG;  
 ecs:ECs0994; -. DR GeneTree; EBGT00050000010054; -. DR HOGENOM; HBG635192; -. DR OMA; SITDYGA; -. DR  
 ProtClustDB; PRK06299; -. DR BioCyc; ECOL83334:ECS0994-MONOMER; -. DR GO; GO:0005840; C:ribosome; IEA:  
 UniProtKB-KW. DR GO; GO:0003723; F:RNA binding; IEA:UniProtKB-KW. DR GO; GO:0003735; F:structural  
 constituent of ribosome; IEA:InterPro. DR GO; GO:0006412; P:translation; IEA:InterPro. DR InterPro;  
 IPR012340; NA-bd\_OB-fold. DR InterPro; IPR016027; NA-bd\_OB-fold-like. DR InterPro; IPR018032; Rbsml-  
 S1\_synth\_mod. DR InterPro; IPR003029; Rbsml\_prot\_S1\_RNA-bd\_dom. DR InterPro; IPR000110; Ribosomal\_S1. DR  
 InterPro; IPR022967; RNA-binding\_domain\_S1. DR Gene3D; G3DSA:2.40.50.140; OB\_NA\_bd\_sub; 6. DR Pfam;  
 PF00575; S1; 6. DR PRINTS; PR00681; RIBOSOMALS1. DR SMART; SM00316; S1; 6. DR SUPFAM; SSF50249;  
 Nucleic\_acid\_OB; 6. DR TIGRFAMS; TIGR00717; RpsA; 1. DR PROSITE; PS50126; S1; 6. PE 3: Inferred from  
 homology; KW Acetylation; Complete proteome; Phosphoprotein; Repeat; KW Ribonucleoprotein; Ribosomal  
 protein; RNA-binding. FT CHAIN 1 557 30S ribosomal protein S1. FT /FTid=PRO\_0000196034. FT DOMAIN 21 87 S1  
 motif 1. FT DOMAIN 105 171 S1 motif 2. FT DOMAIN 192 260 S1 motif 3. FT DOMAIN 277 347 S1 motif 4. FT  
 DOMAIN 364 434 S1 motif 5. FT DOMAIN 451 520 S1 motif 6. FT MOD\_RES 229 229 N6-acetyllysine (By  
 similarity). FT MOD\_RES 279 279 N6-acetyllysine (By similarity). FT MOD\_RES 363 363 N6-acetyllysine (By  
 similarity). SQ SEQUENCE 557 AA; 61158 MW; 0ABCDEB9E510C267 CRC64; MTESFAQLFE ESLKEIETRP GSIVRGVVVA  
 IDKDVVLVDA GLKSESAIPA EQFKNAQGEL EIQVGDEV DV ALDAVEDGFG ETLLSREKAK RHEAWITLEK AYEDAETVTG VINGKVKGGF  
 TVELNGIRAF LPGSLVDVRP VRDTLHLEGK ELEFKVIKLD QKRNNVVVSR RAVIESENSA ERDQLLENLQ EGMEVKGIVK NLTDYGAFVD  
 LGGVDGLLHI TDMAWKRVKH PSEIVNVGDE ITVKVLKFDR ERTRVSLGLK QLGEDPWVAI AKRYPEGTKL TGRVTNLTDY GCFVEIEEGV  
 EGLVHVSEMD WTNKNIHPSK VNVGDEVVEV MVL DIDEERR RISLGLKQCK ANPWQQFAET HNKGDRVEGK IKSITDFGIF IGLDGGIDGL  
 VHLSDISWNV AGEEAVREYK KGDEIAAVVL QVDAERERIS LGVKQLAEDP FNNWVALNKK GAIVTGKVTA VDAKGATVEL ADGVEGYLRA  
 SEASRDRVED ATLVLSVGDE VEAKFTGVDR KNRAISLSVR AKDEADEKDA IATV NKQEDA NFSNNAMAEA FKA AKGE

Mascot: <http://www.matrixscience.com/>



# Mascot Search Results

## Protein View

Match to: **EFTU\_ACIBT** Score: **138**

**Elongation factor Tu OS=Acinetobacter baumannii (strain ATCC 17978 / NCDC KC 755) GN=tuf1 PE=3 SV=2**

Found in search of C:\Temp\mas4.tmp

Nominal mass ( $M_r$ ): **43150**; Calculated pI value: **5.21**

NCBI BLAST search of [EFTU\\_ACIBT](#) against nr

Unformatted [sequence string](#) for pasting into other applications

Taxonomy: [Acinetobacter baumannii ATCC 17978](#)

Fixed modifications: Carbamidomethyl (C)

Variable modifications: Oxidation (M)

Cleavage by Trypsin: cuts C-term side of KR unless next residue is P

Sequence Coverage: **11%**

Matched peptides shown in **Bold Red**

```

1 MAKAKFERNK PHVNVGTIGH VDHGKTTLTA AIATICAKTY GGEAKDYSQI
51 DSAPEEKARG ITINTSHVEY DSPTRHYAHV DCPGHADYVK NMITGAAQMD
101 GAILVCAATD GPMPQTREHI LLSRQVGVPY IIVFLNKCDL VDDEELLELV
151 EMEVRELLST YDFPGDDTPV IRGSALAALN GEAGPYGEES VLALVAALDS
201 YIPEPERAID KAFLMPIEDV FSISGRGTVV TGRVEAGIIK VGEEVEIVGI
251 KDTVKTTVT G VEMFRKLLDE GRAGENCGIL LRGTKREEVQ RGQVLAKPGT
301 IKPHTKFD AE VYVLSKEEGG RHTPFLNGYR PQFYFRITTDV TGAIQLKEGV
351 EMVMPGDNVE MSVELIHPIA MDPGLRFAIR EGGRTVGAGV VAKVTA
    
```

Residue Number      Increasing Mass      Decreasing Mass

| Start - End    | Observed        | Mr(expt)         | Mr(calc)         | Delta         | Miss     | Sequence                                                  |
|----------------|-----------------|------------------|------------------|---------------|----------|-----------------------------------------------------------|
| <b>26 - 38</b> | <b>667.8793</b> | <b>1333.7440</b> | <b>1333.7275</b> | <b>0.0165</b> | <b>0</b> | <b>K.TTLTAAIATICA.K</b> ( <a href="#">Ions score 55</a> ) |

|           |          |           |           |        |   |                       |                                                 |
|-----------|----------|-----------|-----------|--------|---|-----------------------|-------------------------------------------------|
| 156 - 172 | 969.4954 | 1936.9762 | 1936.9418 | 0.0343 | 0 | R.ELLSTYDFPGDDTPVIR.G | ( <a href="#">Ions score 22</a> )               |
| 156 - 172 | 969.9799 | 1937.9452 | 1936.9418 | 1.0033 | 0 | R.ELLSTYDFPGDDTPVIR.G | ( <a href="#">Ions score 33</a> )               |
| 156 - 172 | 970.0003 | 1937.9860 | 1936.9418 | 1.0442 | 0 | R.ELLSTYDFPGDDTPVIR.G | ( <a href="#">Ions score 37</a> )               |
| 212 - 226 | 841.4379 | 1680.8612 | 1680.8545 | 0.0066 | 0 | K.AFLMPIEDVFSISGR.G   | ( <a href="#">Ions score 28</a> )               |
| 212 - 226 | 849.4418 | 1696.8690 | 1696.8494 | 0.0196 | 0 | K.AFLMPIEDVFSISGR.G   | Oxidation (M) ( <a href="#">Ions score 48</a> ) |

Error: try setting browser cache to automatic.

Error: try setting browser cache to automatic.

---

AC A3M1F6; DT 20-MAY-2008, integrated into UniProtKB/Swiss-Prot. DT 20-MAY-2008, sequence version 2. DT 31-MAY-2011, entry version 36. DE RecName: Full=Elongation factor Tu; DE Short=EF-Tu; GN Name=tuf1; OrderedLocusNames=A1S\_0279; GN and GN Name=tuf2; OrderedLocusNames=A1S\_0869; OS Acinetobacter baumannii (strain ATCC 17978 / NCDC KC 755). OC Bacteria; Proteobacteria; Gammaproteobacteria; Pseudomonadales; OC Moraxellaceae; Acinetobacter; OC Acinetobacter calcoaceticus/baumannii complex. OX NCBI\_TaxID=400667; RN [1] RP NUCLEOTIDE SEQUENCE [LARGE SCALE GENOMIC DNA]. RC STRAIN=ATCC 17978 / NCDC KC 755; RX PubMed=17344419; DOI=10.1101/gad.1510307; RA Smith M.G., Gianoulis T.A., Pukatzki S., Mekalanos J.J., Ornston L.N., RA Gerstein M., Snyder M.; RT "New insights into Acinetobacter baumannii pathogenesis revealed by RT high-density pyrosequencing and transposon mutagenesis."; RL Genes Dev. 21:601-614(2007). CC -!- FUNCTION: This protein promotes the GTP-dependent binding of CC aminoacyl-tRNA to the A-site of ribosomes during protein CC biosynthesis (By similarity). CC -!- SUBUNIT: Monomer (By similarity). CC -!- SUBCELLULAR LOCATION: Cytoplasm (By similarity). CC -!- SIMILARITY: Belongs to the GTP-binding elongation factor family. CC EF-Tu/EF-1A subfamily. CC -!- SEQUENCE CAUTION: CC Sequence=AB011301.2; Type=Miscellaneous discrepancy; Note=This prediction is not full-length and may not be functional; CC ----- CC Copyrighted by the UniProt Consortium, see <http://www.uniprot.org/terms> CC Distributed under the Creative Commons Attribution-NoDerivs License CC ----- DR EMBL; CP000521; AB010750.2; -; Genomic\_DNA. DR EMBL; CP000521; AB011301.2; ALT\_SEQ; Genomic\_DNA. DR RefSeq; YP\_001083352.2; NC\_009085.1. DR RefSeq; YP\_001083903.2; NC\_009085.1. DR ProteinModelPortal; A3M1F6; -. DR SMR; A3M1F6; 5-394. DR STRING; A3M1F6; -. DR GeneID; 4917140; -. DR GeneID; 4919042; -. DR GenomeReviews; CP000521\_GR; A1S\_0279. DR GenomeReviews; CP000521\_GR; A1S\_0869. DR KEGG; acb:A1S\_0279; -. DR KEGG; acb:A1S\_0869; -. DR eggNOG; COG0050; -. DR HOGENOM; HBG307581; -. DR GO; GO:0005737; C:cytoplasm; IEA:

UniProtKB-SubCell. DR GO; GO:0005525; F:GTP binding; IEA:UniProtKB-KW. DR GO; GO:0003924; F:GTPase activity; IEA:InterPro. DR GO; GO:0003746; F:translation elongation factor activity; IEA:UniProtKB-KW. DR HAMAP; MF\_00118\_B; EF\_Tu\_B; 1; -. DR InterPro; IPR000795; ProtSyn\_GTP-bd. DR InterPro; IPR005225; Small\_GTP-bd\_dom. DR InterPro; IPR009001; Transl\_elong\_EF1A/Init\_IF2\_C. DR InterPro; IPR004161; Transl\_elong\_EFTu/EF1A\_2. DR InterPro; IPR004541; Transl\_elong\_EFTu/EF1A\_bac/org. DR InterPro; IPR004160; Transl\_elong\_EFTu/EF1A\_C. DR InterPro; IPR009000; Transl\_elong\_init/rib\_B-barrel. DR PANTHER; PTHR23115:SF31; Transl\_elong\_EFTu/EF1A\_bac/org; 1. DR Pfam; PF00009; GTP\_EFTU; 1. DR Pfam; PF03144; GTP\_EFTU\_D2; 1. DR Pfam; PF03143; GTP\_EFTU\_D3; 1. DR PRINTS; PR00315; ELONGATNFCT. DR SUPFAM; SSF50465; Elong\_init\_C; 1. DR SUPFAM; SSF50447; Translat\_factor; 1. DR TIGRFAMs; TIGR00485; EF-Tu; 1. DR TIGRFAMs; TIGR00231; Small\_GTP; 1. DR PROSITE; PS00301; EFACTOR\_GTP; 1. PE 3: Inferred from homology; KW Complete proteome; Cytoplasm; Elongation factor; GTP-binding; KW Nucleotide-binding; Protein biosynthesis. FT CHAIN 1 396 Elongation factor Tu. FT /FTId=PRO\_0000337301. FT NP\_BIND 19 26 GTP (By similarity). FT NP\_BIND 81 85 GTP (By similarity). FT NP\_BIND 136 139 GTP (By similarity). SQ SEQUENCE 396 AA; 42892 MW; 56B9D9300174DF8A CRC64; MAKAKFERNK PHVNVGTIGH VDHGKTTTLTA AIATICAKTY GGEAKDYSQI DSAPEEKARG ITINTSHVEY DSPTRHYAHV DCPGHADYVK NMITGAAQMD GAILVCAATD GPMPQTREHI LLSRQVGVPY IIVFLNKCDL VDDEELLELV EMEVRELLST YDFPGDDTPV IRGSALAAALN GEAGPYGEES VLALVAALDS YIPEPERAID KAFLMPIEDV FSISGRGTVV TGRVEAGIIK VGEEVEIVGI KDTVKTTVTGTG VEMFRKLLDE GRAGENCGIL LRGTKREEVQ RGQVLAKPGT IKPHTKFDAAE VYVLSKEEGG RHTPFLNGYR PQFYFRTTDDV TGAIQLKEGV EMVMPGDNVE MSVELIHPIA MDPGLRFAIR EGGRTVGAGV VAKVTA

**Mascot:** <http://www.matrixscience.com/>

# Mascot Search Results

## Protein View

Match to: **EFTU\_ACIAD** Score: 162

**Elongation factor Tu OS=Acinetobacter sp. (strain ADP1) GN=tuf1 PE=3 SV=1**

Found in search of C:\Temp\mas4C.tmp

Nominal mass ( $M_r$ ): **43213**; Calculated pI value: **5.20**

NCBI BLAST search of [EFTU\\_ACIAD](#) against nr

Unformatted [sequence string](#) for pasting into other applications

Taxonomy: [Acinetobacter sp. ADP1](#)

Fixed modifications: Carbamidomethyl (C)

Variable modifications: Oxidation (M)

Cleavage by Trypsin: cuts C-term side of KR unless next residue is P

Sequence Coverage: **8%**

Matched peptides shown in **Bold Red**

```

1 MAKAKFERNK PHVNVGTIGH VDHGKTTLTA AIATICAKTY GGEAKDYSQI
51 DSAPEEKARG ITINTSHVEY DSPIRHYAHV DCPGHADYVK NMITGAAQMD
101 GAILVCAATD GPMPQTREHI LLSRQVGVPY IVVFLNKCDL VDDEELLELV
151 EMEVRELLST YDFPGDDTPV IRGSALKALE GDAGQYGESS VLALVEALDT
201 YIPEPERAID KAFLMPIEDV FSISGRGTVV TGRVEAGIVK VGESVEIVGI
251 RDTQTTTVTG VEMFRKLLDE GRAGENCGVL LRGTKREDVQ RGQVLAKPGT
301 IKPHTKFDAE VYVLSKEEGG RHTPFLNGYR PQFYFRITTDV TGAIQLKEGV
351 EMVMPGDNVE MSVELIHPIA MDPGLRFAIR EGGRTVGAGV VAKVTA
    
```

Residue Number      Increasing Mass      Decreasing Mass

| Start - End      | Observed        | Mr(expt)         | Mr(calc)         | Delta          | Miss     | Sequence                                                       |
|------------------|-----------------|------------------|------------------|----------------|----------|----------------------------------------------------------------|
| <b>156 - 172</b> | <b>969.4194</b> | <b>1936.8243</b> | <b>1936.9418</b> | <b>-0.1176</b> | <b>0</b> | <b>R.ELLSTYDFPGDDTPVIR.G</b> ( <a href="#">Ions score 91</a> ) |

|           |          |           |           |         |   |                     |                                                 |
|-----------|----------|-----------|-----------|---------|---|---------------------|-------------------------------------------------|
| 212 - 226 | 841.3946 | 1680.7747 | 1680.8545 | -0.0799 | 0 | K.AFLMPIEDVFSISGR.G | ( <a href="#">Ions score 70</a> )               |
| 212 - 226 | 849.3956 | 1696.7766 | 1696.8494 | -0.0728 | 0 | K.AFLMPIEDVFSISGR.G | Oxidation (M) ( <a href="#">Ions score 63</a> ) |

Error: try setting browser cache to automatic.

Error: try setting browser cache to automatic.

---

AC Q6FF97; Q6FDS5; DT 20-MAY-2008, integrated into UniProtKB/Swiss-Prot. DT 19-JUL-2004, sequence version 1. DT 31-MAY-2011, entry version 55. DE RecName: Full=Elongation factor Tu; DE AltName: Full=EF-Tu 1; GN Name=tuf1; Synonyms=tufB; OrderedLocusNames=ACIAD0299; GN and GN Name=tuf2; Synonyms=tufA; OrderedLocusNames=ACIAD0885; OS Acinetobacter sp. (strain ADP1). OC Bacteria; Proteobacteria; Gammaproteobacteria; Pseudomonadales; OC Moraxellaceae; Acinetobacter. OX NCBI\_TaxID=62977; RN [1] RP NUCLEOTIDE SEQUENCE [LARGE SCALE GENOMIC DNA]. RC STRAIN=ADP1; RX PubMed=15514110; DOI=10.1093/nar/gkh910; RA Barbe V., Vallenet D., Fonknechten N., Kreimeyer A., Oztas S., RA Labarre L., Cruveiller S., Robert C., Duprat S., Wincker P., RA Ornston L.N., Weissenbach J., Marliere P., Cohen G.N., Medigue C.; RT "Unique features revealed by the genome sequence of Acinetobacter sp. RT ADP1, a versatile and naturally transformation competent bacterium."; RL Nucleic Acids Res. 32:5766-5779(2004). CC -!- FUNCTION: This protein promotes the GTP-dependent binding of CC aminoacyl-tRNA to the A-site of ribosomes during protein CC biosynthesis (By similarity). CC -!- SUBUNIT: Monomer (By similarity). CC -!- SUBCELLULAR LOCATION: Cytoplasm (By similarity). CC -!- SIMILARITY: Belongs to the GTP-binding elongation factor family. CC EF-Tu/EF-1A subfamily. CC -!- SEQUENCE CAUTION: CC Sequence=CAG67783.1; Type=Erroneous initiation; CC ----- CC Copyrighted by the UniProt Consortium, see <http://www.uniprot.org/terms> CC Distributed under the Creative Commons Attribution-NoDerivs License CC ----- DR EMBL; CR543861; CAG67260.1; -; Genomic\_DNA. DR EMBL; CR543861; CAG67783.1; ALT\_INIT; Genomic\_DNA. DR RefSeq; YP\_045082.1; NC\_005966.1. DR RefSeq; YP\_045605.2; NC\_005966.1. DR HSSP; P0A6N1; 2BVN. DR ProteinModelPortal; Q6FF97; -. DR SMR; Q6FF97; 5-394. DR STRING; Q6FF97; -. DR GeneID; 2880795; -. DR GeneID; 2880796; -. DR GenomeReviews; CR543861\_GR; ACIAD0299. DR GenomeReviews; CR543861\_GR; ACIAD0885. DR KEGG; aci:ACIAD0299; -. DR KEGG; aci:ACIAD0885; -. DR eggNOG; COG0050; -. DR HOGENOM; HBG307581; -. DR PhylomeDB; Q6FF97; -. DR BioCyc; ASP62977:ACIAD0299-MONOMER; -. DR GO; GO:0005737; C:cytoplasm; IEA: UniProtKB-SubCell. DR GO; GO:0005525; F:GTP binding; IEA:UniProtKB-KW. DR GO; GO:0003924; F:GTPase activity; IEA:InterPro. DR GO; GO:0003746; F:translation elongation factor activity; IEA:UniProtKB-KW. DR HAMAP; MF\_00118\_B; EF\_Tu\_B; 1; -. DR InterPro; IPR000795; ProtSyn\_GTP-bd. DR InterPro; IPR005225;

Small\_GTP-bd\_dom. DR InterPro; IPR009001; Transl\_elong\_EF1A/Init\_IF2\_C. DR InterPro; IPR004161;  
 Transl\_elong\_EFTu/EF1A\_2. DR InterPro; IPR004541; Transl\_elong\_EFTu/EF1A\_bac/org. DR InterPro; IPR004160;  
 Transl\_elong\_EFTu/EF1A\_C. DR InterPro; IPR009000; Transl\_elong\_init/rib\_B-barrel. DR PANTHER; PTHR23115:  
 SF31; Transl\_elong\_EFTu/EF1A\_bac/org; 1. DR Pfam; PF00009; GTP\_EFTU; 1. DR Pfam; PF03144; GTP\_EFTU\_D2; 1.  
 DR Pfam; PF03143; GTP\_EFTU\_D3; 1. DR PRINTS; PR00315; ELONGATNFCT. DR SUPFAM; SSF50465; Elong\_init\_C; 1.  
 DR SUPFAM; SSF50447; Translat\_factor; 1. DR TIGRFAMs; TIGR00485; EF-Tu; 1. DR TIGRFAMs; TIGR00231;  
 Small\_GTP; 1. DR PROSITE; PS00301; EFACTOR\_GTP; 1. PE 3: Inferred from homology; KW Complete proteome;  
 Cytoplasm; Elongation factor; GTP-binding; KW Nucleotide-binding; Protein biosynthesis. FT CHAIN 1 396  
 Elongation factor Tu. FT /FTid=PRO\_0000337302. FT NP\_BIND 19 26 GTP (By similarity). FT NP\_BIND 81 85 GTP  
 (By similarity). FT NP\_BIND 136 139 GTP (By similarity). SQ SEQUENCE 396 AA; 42955 MW; 51C4442B84266E7B  
 CRC64; MAKAKFERNK PHVNVGTIGH VDHGKTTLTA AIATICAITY GGEAKDYSQI DSAPEEKARG ITINTSHVEY DSPIRHYAHV DCPGHADYVK  
 NMITGAAQMD GAILVCAATD GPMPQTREHI LLSRQVGVPY IVVFLNKCDL VDDEELLELV EMEVRELLST YDFPGDDTPV IRGSALKALE  
 GDAGQYGESE VLALVEALDT YIPEPERAID KAFLMPIEDV FSISGRGTVV TGRVEAGIVK VGESVEIVGI RDTQTTTDTG VEMFRKLLDE  
 GRAGENCGVL LRGTKREDVQ RGQVLAKPGT IKPHTKFDAA VYVLSKEEGG RHTPFLNGYR PQFYFRITTDV TGAIQLKEGV EMVMPGDNVE  
 MSVELIHPIA MDPGLRFAIR EGGRTVGAGV VAKVTA

**Mascot:** <http://www.matrixscience.com/>

# Mascot Search Results

## Protein View

Match to: **RPOA\_ACIBC** Score: **199**

**DNA-directed RNA polymerase subunit alpha OS=Acinetobacter baumannii (strain ACICU) GN=rpoA PE=3 SV=1**

Found in search of C:\Temp\mas54.tmp

Nominal mass ( $M_r$ ): **37295**; Calculated pI value: **5.10**

NCBI BLAST search of [RPOA\\_ACIBC](#) against nr

Unformatted [sequence string](#) for pasting into other applications

Taxonomy: [Acinetobacter baumannii ACICU](#)

Fixed modifications: Carbamidomethyl (C)

Variable modifications: Oxidation (M)

Cleavage by Trypsin: cuts C-term side of KR unless next residue is P

Sequence Coverage: **14%**

Matched peptides shown in **Bold Red**

```

1 MTRTANEFLLT PQAIKVEAVS GTSAKVILEP LERGFGHTLG NALRRILLSS
51 LPGAAVVEVE IEGVEHEYST LEGLQQDIVE LLLNLKGLSI KLFDQNEAYL
101 TLEKQGPDI TAADLRPHN VEVVNPEHLI GTLSATGSLK MRLKVSQGRG
151 YETSDSRFPE GETRPVGRLQ LDASYSPIKR VSYTVENARV EQRTDLDKLV
201 IDLETNGTVD PEEAIRKAAT ILQQQIAIFV DLQKDQTPVA QEPREEVDPI
251 LLRPVDDLEL TVRSANCLKA ENIYYIGDLV QRTEVELLKT PNLGKKS LTE
301 IKDVLASKGL QLGMRLENWP PASLRMDDRF AYRSR
    
```

Residue Number      Increasing Mass      Decreasing Mass

| Start - End     | Observed        | Mr(expt)         | Mr(calc)         | Delta         | Miss     | Sequence                                                   |
|-----------------|-----------------|------------------|------------------|---------------|----------|------------------------------------------------------------|
| <b>34 - 44</b>  | <b>571.8351</b> | <b>1141.6557</b> | <b>1141.5992</b> | <b>0.0565</b> | <b>0</b> | <b>R.GFGHTLGNALR.R</b> ( <a href="#">Ions score 37</a> )   |
| <b>92 - 104</b> | <b>792.4306</b> | <b>1582.8466</b> | <b>1582.7879</b> | <b>0.0587</b> | <b>0</b> | <b>K.LFDQNEAYLTLEK.Q</b> ( <a href="#">Ions score 42</a> ) |

|           |          |           |           |        |   |                   |                                   |
|-----------|----------|-----------|-----------|--------|---|-------------------|-----------------------------------|
| 169 - 180 | 695.9186 | 1389.8227 | 1389.7616 | 0.0611 | 1 | R.LQLDASYSPIKR.V  | ( <a href="#">Ions score 79</a> ) |
| 270 - 282 | 777.4343 | 1552.8541 | 1552.7885 | 0.0655 | 0 | K.AENIYYIGDLVQR.T | ( <a href="#">Ions score 41</a> ) |

Error: try setting browser cache to automatic.

Error: try setting browser cache to automatic.

---

AC B2HZ83; DT 24-MAR-2009, integrated into UniProtKB/Swiss-Prot. DT 10-JUN-2008, sequence version 1. DT 27-JUL-2011, entry version 21. DE RecName: Full=DNA-directed RNA polymerase subunit alpha; DE Short=RNAP subunit alpha; DE EC=2.7.7.6; DE AltName: Full=RNA polymerase subunit alpha; DE AltName: Full=Transcriptase subunit alpha; GN Name=rpoA; OrderedLocusNames=ACICU\_03253; OS Acinetobacter baumannii (strain ACICU). OC Bacteria; Proteobacteria; Gammaproteobacteria; Pseudomonadales; OC Moraxellaceae; Acinetobacter; OC Acinetobacter calcoaceticus/baumannii complex. OX NCBI\_TaxID=405416; RN [1] RP NUCLEOTIDE SEQUENCE [LARGE SCALE GENOMIC DNA]. RC STRAIN=ACICU; RX PubMed=18411315; DOI=10.1128/AAC.01643-07; RA Iacono M., Villa L., Fortini D., Bordoni R., Imperi F., Bonnal R.J., RA Sicheritz-Ponten T., De Bellis G., Visca P., Cassone A., Carattoli A.; RT "Whole-genome pyrosequencing of an epidemic multidrug-resistant RT Acinetobacter baumannii strain belonging to the European clone II RT group."; RL Antimicrob. Agents Chemother. 52:2616-2625(2008). CC -!- FUNCTION: DNA-dependent RNA polymerase catalyzes the transcription CC of DNA into RNA using the four ribonucleoside triphosphates as CC substrates (By similarity). CC -!- CATALYTIC ACTIVITY: Nucleoside triphosphate + RNA(n) = diphosphate CC + RNA(n+1). CC -!- SUBUNIT: Homodimer. The RNAP catalytic core consists of 2 alpha, 1 CC beta, 1 beta' and 1 omega subunit. When a sigma factor is CC associated with the core the holoenzyme is formed, which can CC initiate transcription (By similarity). CC -!- DOMAIN: The N-terminal domain is essential for RNAP assembly and CC basal transcription, whereas the C-terminal domain is involved in CC interaction with transcriptional regulators and with upstream CC promoter elements (By similarity). CC -!- SIMILARITY: Belongs to the RNA polymerase alpha chain family. CC

----- CC Copyrighted by the UniProt Consortium, see <http://www.uniprot.org/terms> CC Distributed under the Creative Commons Attribution-NoDerivs License CC ----- DR EMBL; CP000863; ACC58565.1; -; Genomic\_DNA. DR RefSeq; YP\_001847912.1; NC\_010611.1. DR ProteinModelPortal; B2HZ83; -. DR SMR; B2HZ83; 1-233, 248-324. DR STRING; B2HZ83; -. DR GeneID; 6235189; -. DR GenomeReviews; CP000863\_GR; ACICU\_03253. DR KEGG; abc:ACICU\_03253; -. DR HOGENOM; HBG430844; -. DR OMA; FGTTLGN; -. DR ProtClustDB; PRK05182; -. DR GO; GO:0003677; F:DNA binding; IEA:InterPro. DR GO; GO:0003899; F:DNA-directed RNA polymerase activity; IEA:UniProtKB-KW. DR GO; GO:0046983; F:protein dimerization activity;



IEA:InterPro. DR HAMAP; MF\_00059; RNAPol\_bact\_RpoA; 1; -. DR InterPro; IPR011261; DNA-dir\_RNA\_pol\_dimersation. DR InterPro; IPR011262; DNA-dir\_RNA\_pol\_insert. DR InterPro; IPR009025; DNA-dir\_RNA\_pol\_RBP11-like. DR InterPro; IPR011263; DNA-dir\_RNA\_pol\_RpoA/D/Rpb3. DR InterPro; IPR011260; RNAP\_asu\_C. DR InterPro; IPR011773; RpoA. DR Gene3D; G3DSA:2.170.120.12; RNAP\_insert; 1. DR Pfam; PF01000; RNA\_pol\_A\_bac; 1. DR Pfam; PF03118; RNA\_pol\_A\_CTD; 1. DR Pfam; PF01193; RNA\_pol\_L; 1. DR ProDom; PD001179; RNAP\_asu\_C; 1. DR SMART; SM00662; RPOLD; 1. DR SUPFAM; SSF47789; RNAP\_alpha\_C; 1. DR SUPFAM; SSF56553; RNAP\_insert; 1. DR SUPFAM; SSF55257; RNAP\_RBP11-like; 1. DR TIGRFAMs; TIGR02027; RpoA; 1. PE 3: Inferred from homology; KW Complete proteome; DNA-directed RNA polymerase; KW Nucleotidyltransferase; Transcription; Transferase. FT CHAIN 1 335 DNA-directed RNA polymerase subunit FT alpha. FT / FTId=PRO\_1000091918. FT REGION 1 233 Alpha N-terminal domain (alpha-NTD) (By FT similarity). FT REGION 247 335 Alpha C-terminal domain (alpha-CTD) (By FT similarity). SQ SEQUENCE 335 AA; 37260 MW; 070997D8F74DB888 CRC64; MTRTANEFLT PQAIKVEAVS GTSAKVILEP LERGFHTLG NALRRILLSS LPGAAVVEVE IEGVEHEYST LEGLQQDIVE LLLNLKGLSI KLFQNEAYL TLEKQPGDI TAADLRLPHN VEVVNPEHLI GTLSATGSLK MRLKVSQGRG YETSDSRFPE GETRPVGRQLQ LDASYSPIKR VSYTVENARV EQRTDLKLV IDLETNGTVD PEEAIRKAAT ILQQQIAIFV DLQKDQTPVA QEPREEVDPI LLRPVDDLEL TVRSANCLKA ENIYYIGDLV QRTEVELLKT PNLGKKSLE IKDVLASKGL QLGMRLENWP PASLRMDDRF AYRSR

**Mascot:** <http://www.matrixscience.com/>

# Mascot Search Results

## Protein View

Match to: **CH60\_ACIB3** Score: **191**

**60 kDa chaperonin OS=Acinetobacter baumannii (strain AB307-0294) GN=groL PE=3 SV=1**

Found in search of C:\Temp\mas51.tmp

Nominal mass ( $M_r$ ): **57245**; Calculated pI value: **4.92**

NCBI BLAST search of [CH60\\_ACIB3](#) against nr

Unformatted [sequence string](#) for pasting into other applications

Taxonomy: [Acinetobacter baumannii AB307-0294](#)

Fixed modifications: Carbamidomethyl (C)

Variable modifications: Oxidation (M)

Cleavage by Trypsin: cuts C-term side of KR unless next residue is P

Sequence Coverage: **11%**

Matched peptides shown in **Bold Red**

```

1  MSAKDVKFGD SARKMIAGV NVLADAVKVT LGPKGRNVVI DRSFGAPHIT
51  KDGVTVAKEI SLKDKFENMG AQLVREVSSK TNDIAGDGT TATVLAQAIL
101 NEGIKSVTAG MNPMDLKRGI DIAVKTIVEN IRSIAKPADD FKAIEQVGSY
151 SANSDTTVGK LIAQAMEKVG KEGVITVEEG SGFEDALDVV EGMQFDRGYI
201 SPYFANKQDT LTAELNPFIL LLVDKKISNI RELISVLEAV AKTGKPLLLII
251 AEDVEGEALA TLVVNNMRGI IKVCAVKAPG FGDRRKAMLQ DIAILTGATV
301 ISEEVGMSLE QATLQDLGTA HKITVSKENT VIVDGAGDAA AIAERVQQIR
351 AQIEESTSEY DREKLQERVA KLAGGVAIVK IGAATEVEMK EKKDRVDDAL
401 HATRAAVEEG VVAGGGVALV RAVNALEGLK GANEDQTAGI NILRRAIEAP
451 LRQIVANAGD EPSVVINAVK NGEGNFGYNA ATGEYGDMLE MGILDPAKVT
501 RSALEHAASV AGLMLTTECM ITDIPEDKPA APDMGGMGGM GGMM
    
```

Residue Number      Increasing Mass      Decreasing Mass

| Start - End                   | Observed  | Mr(expt)  | Mr(calc)  | Delta  | Miss | Sequence                                        |
|-------------------------------|-----------|-----------|-----------|--------|------|-------------------------------------------------|
| 81 - 105                      | 1244.6432 | 2487.2718 | 2486.2864 | 0.9854 | 0    | K.TNDIAGDGT'TTATVLAQAILNEGIIK.S (Ions score 98) |
| 81 - 105                      | 830.1091  | 2487.3055 | 2486.2864 | 1.0191 | 0    | K.TNDIAGDGT'TTATVLAQAILNEGIIK.S (Ions score 79) |
| 172 - 197                     | 949.1170  | 2844.3292 | 2843.2808 | 1.0484 | 0    | K.EGVITVEEGSGFEDALDVVEGMQFDR.G                  |
| Oxidation (M) (Ions score 52) |           |           |           |        |      |                                                 |
| 232 - 242                     | 586.8663  | 1171.7180 | 1170.6860 | 1.0320 | 0    | R.ELISVLEAVAK.T (Ions score 40)                 |

Error: try setting browser cache to automatic.

Error: try setting browser cache to automatic.

---

AC B7GY36; DT 14-APR-2009, integrated into UniProtKB/Swiss-Prot. DT 10-FEB-2009, sequence version 1. DT 27-JUL-2011, entry version 18. DE RecName: Full=60 kDa chaperonin; DE AltName: Full=GroEL protein; DE AltName: Full=Protein Cpn60; GN Name=groL; Synonyms=groEL; OrderedLocusNames=ABBFA\_000812; OS Acinetobacter baumannii (strain AB307-0294). OC Bacteria; Proteobacteria; Gammaproteobacteria; Pseudomonadales; OC Moraxellaceae; Acinetobacter; OC Acinetobacter calcoaceticus/baumannii complex. OX NCBI\_TaxID=557600; RN [1] RP NUCLEOTIDE SEQUENCE [LARGE SCALE GENOMIC DNA]. RC STRAIN=AB307-0294; RX PubMed=18931120; DOI=10.1128/JB.00834-08; RA Adams M.D., Goglin K., Molyneaux N., Hujer K.M., Lavender H., RA Jamison J.J., MacDonald I.J., Martin K.M., Russo T., Campagnari A.A., RA Hujer A.M., Bonomo R.A., Gill S.R.; RT "Comparative genome sequence analysis of multidrug-resistant RT Acinetobacter baumannii."; RL J. Bacteriol. 190:8053-8064(2008). CC -!- FUNCTION: Prevents misfolding and promotes the refolding and CC proper assembly of unfolded polypeptides generated under stress CC conditions (By similarity). CC -!- SUBUNIT: Oligomer of 14 subunits composed of two stacked rings of CC 7 subunits (By similarity). CC -!- SUBCELLULAR LOCATION: Cytoplasm (By similarity). CC -!- SIMILARITY: Belongs to the chaperonin (HSP60) family. CC ----- CC Copyrighted by the UniProt Consortium, see http://www.uniprot.org/terms CC Distributed under the Creative Commons Attribution-NoDerivs License CC ----- DR EMBL; CP001172; ACJ57160.1; -; Genomic\_DNA. DR RefSeq; YP\_002324726.1; NC\_011595.1. DR ProteinModelPortal; B7GY36; -. DR SMR; B7GY36; 3-524. DR STRING; B7GY36; -. DR GeneID; 7059658; -. DR GenomeReviews; CP001172\_GR; ABBFA\_000812. DR KEGG; abb:ABBFA\_000812; -. DR HOGENOM; HBG625289; -. DR OMA; DKPAAGM; -. DR ProtClustDB; PRK00013; -. DR GO; GO:0005737; C:cytoplasm; IEA:UniProtKB-SubCell. DR GO; GO:0005524; F:ATP

binding; IEA:UniProtKB-KW. DR GO; GO:0042026; P:protein refolding; IEA:InterPro. DR HAMAP; MF\_00600; CH60; 1; -. DR InterPro; IPR018370; Chaperonin\_Cpn60\_CS. DR InterPro; IPR001844; Chaprnin\_Cpn60. DR InterPro; IPR002423; Cpn60/TCP-1. DR PANTHER; PTHR11353; Cpn60/TCP-1; 1. DR Pfam; PF00118; Cpn60\_TCP1; 1. DR PRINTS; PR00298; CHAPERONIN60. DR SUPFAM; SSF48592; GroEL-ATPase; 1. DR TIGRFAMs; TIGR02348; GroEL; 1. DR PROSITE; PS00296; CHAPERONINS\_CPN60; 1. PE 3: Inferred from homology; KW ATP-binding; Chaperone; Complete proteome; Cytoplasm; KW Nucleotide-binding. FT CHAIN 1 544 60 kDa chaperonin. FT /FTId=PRO\_1000129956. SQ SEQUENCE 544 AA; 57166 MW; 59547DF028D633D7 CRC64; MSAKDVKFGD SARSKMIAGV NVLADAVKVT LGPKGRNVVI DRSEFGAPHIT KDGVTVAKEI SLKDKFENMG AQLVREVSSK TNDIAGDGTT TATVLAQAIL NEGIKSVTAG MNPMDLKRG I DIAVKT VVEN IRSIAKPADD FKAIEQVGS I SANS DTTVGK LIAQAMEKVG KEGVITVEEG SGFEDALDVV EGMQFDRGYI SPYFANKQDT LTAELENPFI LLVDKKISNI RELISVLEAV AKTGKPLLI I AEDVEGEALA TLVVNNMRGI IKVCAVKAPG FGDRRKAMLQ DIAILT GATV ISEEVGMSLE QATLQDLGTA HKITVSKENT VIVDGAGDAA AIAERVQQIR AQIEESTSEY DREKLQERVA KLAGGVAVIK IGAATEVEMK EKKDRVDDAL HATRAAVEEG VVAGGGVALV RAVNALEGLK GANEDQTAGI NILRRAIEAP LRQIVANAGD EPSVVINAVK NGEENFGYNA ATGEYGDMLE MGILDPKAVT RSALEHAASV AGLMLTTECM ITDIPEDKPA APDMGGMGGM GGMM

**Mascot:** <http://www.matrixscience.com/>

# Mascot Search Results

## Protein View

Match to: **gi|254480295** Score: **62**

**TCP-1/cpn60 chaperonin family protein [marine gamma proteobacterium HTCC2148]**

Found in search of C:\Temp\mas28.tmp

Nominal mass ( $M_r$ ): **31707**; Calculated pI value: **4.74**

NCBI BLAST search of [gi|254480295](#) against nr

Unformatted [sequence string](#) for pasting into other applications

Taxonomy: [marine gamma proteobacterium HTCC2148](#)

Links to retrieve other entries containing this sequence from NCBI Entrez:

[gi|214039857](#) from [marine gamma proteobacterium HTCC2148](#)

Fixed modifications: Carbamidomethyl (C)

Variable modifications: Oxidation (M)

Cleavage by Trypsin: cuts C-term side of KR unless next residue is P

Sequence Coverage: **20%**

Matched peptides shown in **Bold Red**

```

1  KASKPLIIIA EDVEGEALAT LVVNNMRGIV KVAACKAPGF GDRRKAMLQD
51 IAILTGGTVI SEEVGMDLES ATLEHLGSAK RMTMDKDNST IIDGAGDAAA
101 IHARVGEIRT QIENTSSDYD REKLQERVAK LAGGVAVIKV GAATEIEMKE
151 KKARVEDALH ATRAAVEEGV VAGGGVALVR AIADIAELKG DNEDQNHGIA
201 AALRAMEGPL RQIVGNAGDE ASVVLDKIRQ GEGNYGYNAA TGEYGDMIEM
251 GILDPKAVTR TALQAAGSVA ALMITTEVMV ADSPDDGAGG APAMPDMGGM
301 GGMGGMM
    
```

Residue Number      Increasing Mass      Decreasing Mass

**Start - End      Observed      Mr(expt)      Mr(calc)      Delta      Miss Sequence**

|                                                     |           |           |           |        |   |                                         |
|-----------------------------------------------------|-----------|-----------|-----------|--------|---|-----------------------------------------|
| 2 - 27                                              | 928.5124  | 2782.5152 | 2781.4946 | 1.0206 | 0 | K.ASKPLIIIAEDVEGEALATLVVNNMR.G          |
| Oxidation (M) ( <a href="#">Ions score 41</a> )     |           |           |           |        |   |                                         |
| 46 - 81                                             | 1263.6455 | 3787.9146 | 3786.9019 | 1.0126 | 1 | K.AMLQDIAILTGGTWISEEVGMDLESATLEHLGSAGR. |
| M 2 Oxidation (M) ( <a href="#">Ions score 21</a> ) |           |           |           |        |   |                                         |

Error: try setting browser cache to automatic.

Error: try setting browser cache to automatic.

---

LOCUS ZP\_05093543 307 aa linear BCT 09-JUN-2010 DEFINITION TCP-1/cpn60 chaperonin family protein [marine gamma proteobacterium HTCC2148]. ACCESSION ZP\_05093543 VERSION ZP\_05093543.1 GI:254480295 DBLINK Project: [55363](#) DBSOURCE REFSEQ: accession [NZ\\_DS999222.1](#) KEYWORDS . SOURCE marine gamma proteobacterium HTCC2148 ORGANISM [marine gamma proteobacterium HTCC2148](#) Bacteria; Proteobacteria; Gammaproteobacteria; OMG group; OM60 clade. REFERENCE 1 (residues 1 to 307) AUTHORS Amann,R., Fuchs,B., Giovannoni,S.J., Ferriera,S., Johnson,J., Kravitz,S., Beeson,K., Sutton,G., Rogers,Y.-H., Friedman,R., Frazier,M. and Venter,J.C. TITLE Direct Submission JOURNAL Submitted (16-JUL-2008) J. Craig Venter Institute, 9704 Medical Center Drive, Rockville, MD 20850, USA COMMENT PREDICTED [REFSEQ](#): This record has not been reviewed and the function is unknown. The reference sequence was derived from [EEB80516](#). COMPLETENESS: incomplete on the amino end. Method: conceptual translation. FEATURES Location/Qualifiers source 1..307 /organism="marine gamma proteobacterium HTCC2148" /strain="HTCC2148" /isolation\_source="10 m water depth from station NH15" /db\_xref="taxon:[247634](#)" /country="USA: Oregon Coast" [Protein](#) <1..307 /product="TCP-1/cpn60 chaperonin family protein" [Region](#) <1..282 /region\_name="chaperonin\_like" /note="chaperonin\_like superfamily. Chaperonins are involved in productive folding of proteins. They share a common general morphology, a double toroid of 2 stacked rings, each composed of 7-9 subunits. There are 2 main chaperonin groups. The symmetry of type...; c102777" /db\_xref="CDD:[194437](#)" [CDS](#) 1..307 /locus\_tag="GPB2148\_3334" /coded\_by="NZ\_DS999222.1:<1..926" /note="[O] COG0459 Chaperonin GroEL (HSP60 family)" /codon\_start=3 /transl\_table=[11](#)

**Mascot:** <http://www.matrixscience.com/>

# Mascot Search Results

## Protein View

Match to: [gi|169633901](#) Score: 236  
**putative lipoprotein [Acinetobacter baumannii SDF]**  
 Found in search of C:\Temp\mas7F.tmp

Nominal mass ( $M_r$ ): **16390**; Calculated pI value: **4.79**

NCBI BLAST search of [gi|169633901](#) against nr  
 Unformatted [sequence string](#) for pasting into other applications

Taxonomy: [Acinetobacter baumannii SDF](#)

Links to retrieve other entries containing this sequence from NCBI Entrez:  
[gi|169152693](#) from [Acinetobacter baumannii](#)

Fixed modifications: Carbamidomethyl (C)

Variable modifications: Oxidation (M)

Cleavage by Trypsin: cuts C-term side of KR unless next residue is P

Sequence Coverage: **36%**

Matched peptides shown in **Bold Red**

1 MQQSRNKHEN KTETTSAST PVQTAQSN NN EAVDTAHTAE NSLDWDGKYK  
 51 GTLPCADCEG IKTELELK**DD KTYELTETYL GKGDANPFET HGKFTFDKDN**  
 101 TSVITLDDKA QNRK**FFIGEN TATALDMEGK KVEGSLAEHY VLK**KED

Residue Number      Increasing Mass      Decreasing Mass

| Start - End | Observed | Mr(expt)  | Mr(calc)  | Delta   | Miss | Sequence                                                     |
|-------------|----------|-----------|-----------|---------|------|--------------------------------------------------------------|
| 69 - 82     | 838.4227 | 1674.8309 | 1674.7988 | 0.0321  | 1    | <b>K.DDKTYELTETYL</b> GK.G ( <a href="#">Ions score 58</a> ) |
| 72 - 82     | 659.3732 | 1316.7318 | 1316.6500 | 0.0818  | 0    | <b>K.TYELTETYL</b> GK.G ( <a href="#">Ions score 48</a> )    |
| 83 - 93     | 586.7891 | 1171.5636 | 1171.5258 | 0.0378  | 0    | <b>K.GDANPFETHGK.F</b> ( <a href="#">Ions score 28</a> )     |
| 115 - 130   | 880.4000 | 1758.7854 | 1758.8134 | -0.0280 | 0    | <b>K.FFIGENTATALDMEGK.K</b> Oxidation (M)                    |

([Ions score 53](#))

131 - 143 737.4225 1472.8304 1471.8035 1.0269 1 K.KVEGSLAEHYVLK.K ([Ions score 51](#))

Error: try setting browser cache to automatic.

Error: try setting browser cache to automatic.

---

LOCUS YP\_001707637 146 aa linear BCT 17-MAY-2011 DEFINITION lipoprotein [Acinetobacter baumannii SDF].  
 ACCESSION YP\_001707637 VERSION YP\_001707637.1 GI:169633901 DBLINK Project: [61601](#) DBSOURCE REFSEQ:  
 accession [NC\\_010400.1](#) KEYWORDS . SOURCE Acinetobacter baumannii SDF ORGANISM [Acinetobacter baumannii SDF](#)  
 Bacteria; Proteobacteria; Gammaproteobacteria; Pseudomonadales; Moraxellaceae; Acinetobacter;  
 Acinetobacter calcoaceticus/baumannii complex. REFERENCE 1 (residues 1 to 146) AUTHORS Vallenet,D.,  
 Nordmann,P., Barbe,V., Poirel,L., Mangenot,S., Bataille,E., Dossat,C., Gas,S., Kreimeyer,A., Lenoble,P.,  
 Oztas,S., Poulain,J., Segurens,B., Robert,C., Abergel,C., Claverie,J.M., Raoult,D., Medigue,C.,  
 Weissenbach,J. and Cruveiller,S. TITLE Comparative analysis of Acinetobacters: three genomes for three  
 lifestyles JOURNAL PLoS ONE 3 (3), E1805 (2008) PUBMED [18350144](#) REMARK Publication Status: Online-Only  
 REFERENCE 2 (residues 1 to 146) CONSRTM NCBI Genome Project TITLE Direct Submission JOURNAL Submitted (04-  
 MAR-2008) National Center for Biotechnology Information, NIH, Bethesda, MD 20894, USA REFERENCE 3  
 (residues 1 to 146) AUTHORS Genoscope -,C.E.A. TITLE Direct Submission JOURNAL Submitted (25-FEB-2008)  
 Genoscope - Centre National de Sequencage : BP 191 91006 EVRY cedex - FRANCE (E-mail : [seqref@genoscope.cns.fr](mailto:seqref@genoscope.cns.fr) - Web : [www.genoscope.cns.fr](http://www.genoscope.cns.fr)) COMMENT PROVISIONAL [REFSEQ](#): This record has not yet been subject to  
 final NCBI review. The reference sequence was derived from [CAP01694](#). Annotation data relative to BLAST  
 similarities, COG assignments, enzymatic function prediction (PRIAM software), TMHMM and SignalP  
 predictions, and synteny results (Syntonyzer software) are available in BaumannoScope database via the  
 MaGe annotation system <http://www.genoscope.cns.fr/agc/mage/baumannoscope>. Method: conceptual translation.  
 FEATURES Location/Qualifiers source 1..146 /organism="Acinetobacter baumannii SDF" /strain="SDF" /  
 db\_xref="taxon:[509170](#)" [Protein](#) 1..146 /product="lipoprotein" /function="1.6.10 : lipoprotein" /  
 calculated\_mol\_wt=16155 [Region](#) 49..135 /region\_name="NlpE" /note="Uncharacterized lipoprotein NlpE  
 involved in copper resistance; cl01138" /db\_xref="CDD:[194049](#)" [CDS](#) 1..146 /locus\_tag="ABSDF2382" /  
 coded\_by="NC\_010400.1:2203755..2204195" /inference="ab initio prediction:AMIGene:2.0" /note="Evidence 3 :  
 Function proposed based on presence of conserved amino acid motif, structural feature or limited homology;  
 Product type pm : membrane component" /transl\_table=[11](#) /db\_xref="GeneID:[5985564](#)"



**Mascot:** <http://www.matrixscience.com/>

# Mascot Search Results

## Protein View

Match to: **gi|56131242** Score: **283**

**carbapenem-associated resistance protein precursor [Acinetobacter baumannii]**

Found in search of C:\Temp\masB.tmp

Nominal mass ( $M_r$ ): **26403**; Calculated pI value: **4.79**

NCBI BLAST search of [gi|56131242](#) against nr

Unformatted [sequence string](#) for pasting into other applications

Taxonomy: [Acinetobacter baumannii](#)

Links to retrieve other entries containing this sequence from NCBI Entrez:

[gi|224015984](#) from [Acinetobacter baumannii](#)

[gi|224015988](#) from [Acinetobacter baumannii](#)

Fixed modifications: Carbamidomethyl (C)

Variable modifications: Oxidation (M)

Cleavage by Trypsin: cuts C-term side of KR unless next residue is P

Sequence Coverage: **19%**

Matched peptides shown in **Bold Red**

```

1 MKVLRVLVTT TALLAAGAAM ADEAVVHDSY AFDKNQLIPV GARAEVGTG
51 YGGALLWQAN PYVGLALGYN GDISWSDDL SINGTKYDMD MDNKLAYLNA
101 EIRPWGASTN PWAQGLYVAA GAAYVDNQYD LTKNVGTNAS VEIDGNRFNG
151 GANGVSIAGN LKYDNDIAPY IGFGFAPKFS KNWGVFGEVG AYYSGNPKVS
201 LASNNDALIG SDGRTLGKTL DDQERKIAND DKYKWLPGK VGVNIFYW
    
```

Residue Number      Increasing Mass      Decreasing Mass

| Start - End | Observed | Mr(expt)  | Mr(calc)  | Delta  | Miss | Sequence                    |                                   |
|-------------|----------|-----------|-----------|--------|------|-----------------------------|-----------------------------------|
| 163 - 178   | 894.9410 | 1787.8675 | 1786.8566 | 1.0109 | 0    | <b>K.YDNDIAPYIGFGFAPK.F</b> | ( <a href="#">Ions score 79</a> ) |

|           |          |           |           |         |   |                      |                                    |
|-----------|----------|-----------|-----------|---------|---|----------------------|------------------------------------|
| 182 - 198 | 922.9259 | 1843.8373 | 1843.8530 | -0.0156 | 0 | K.NWGVFGEVGYSGNPK.V  | ( <a href="#">Ions score 100</a> ) |
| 199 - 214 | 794.9258 | 1587.8371 | 1587.7852 | 0.0518  | 0 | K.VSLASNNDALIGSDGR.T | ( <a href="#">Ions score 104</a> ) |

Error: try setting browser cache to automatic.

Error: try setting browser cache to automatic.

---

LOCUS AAV80243 247 aa linear BCT 28-MAR-2005 DEFINITION carbapenem-associated resistance protein precursor [Acinetobacter baumannii]. ACCESSION AAV80243 VERSION AAV80243.1 GI:56131242 DBSOURCE accession [AY684798.1](#)  
 KEYWORDS . SOURCE Acinetobacter baumannii ORGANISM [Acinetobacter baumannii](#) Bacteria; Proteobacteria; Gammaproteobacteria; Pseudomonadales; Moraxellaceae; Acinetobacter; Acinetobacter calcoaceticus/baumannii complex. REFERENCE 1 (residues 1 to 247) AUTHORS Mussi,M.A., Limansky,A.S. and Viale,A.M. TITLE Acquisition of resistance to carbapenems in multidrug-resistant clinical strains of Acinetobacter baumannii: natural insertional inactivation of a gene encoding a member of a novel family of beta-barrel outer membrane proteins JOURNAL Antimicrob. Agents Chemother. 49 (4), 1432-1440 (2005) PUBMED [15793123](#)  
 REFERENCE 2 (residues 1 to 247) AUTHORS Mussi,M.A., Limansky,A.S. and Viale,A.M. TITLE Direct Submission JOURNAL Submitted (13-JUL-2004) Microbiology, IBR, Suipacha 531, Rosario, Santa Fe 2000, Argentina COMMENT Method: conceptual translation supplied by author. FEATURES Location/Qualifiers source 1..247 / organism="Acinetobacter baumannii" /isolate="Ab244" /db\_xref="taxon:[470](#)" [Protein](#) 1..247 / product="carbapenem-associated resistance protein precursor" /name="outer membrane protein" [sig\\_peptide](#) 1..21 [mat\\_peptide](#) 22..247 /product="carbapenem-associated resistance protein" [CDS](#) 1..247 /gene="carO" / coded\_by="AY684798.1:2134..2877" /note="associated with carbapenem resistance; heat-modifiable protein" / transl\_table=[11](#)

**Mascot:** <http://www.matrixscience.com/>

# Mascot Search Results

## Protein View

Match to: **gi|56131242** Score: **139**

**carbapenem-associated resistance protein precursor [Acinetobacter baumannii]**

Found in search of C:\Temp\mas9.tmp

Nominal mass ( $M_r$ ): **26403**; Calculated pI value: **4.79**

NCBI BLAST search of [gi|56131242](#) against nr

Unformatted [sequence string](#) for pasting into other applications

Taxonomy: [Acinetobacter baumannii](#)

Links to retrieve other entries containing this sequence from NCBI Entrez:

[gi|224015984](#) from [Acinetobacter baumannii](#)

[gi|224015988](#) from [Acinetobacter baumannii](#)

Fixed modifications: Carbamidomethyl (C)

Variable modifications: Oxidation (M)

Cleavage by Trypsin: cuts C-term side of KR unless next residue is P

Sequence Coverage: **13%**

Matched peptides shown in **Bold Red**

```

1 MKVLRVLVTT TALLAAGAAM ADEAVVHDSY AFDKNQLIPV GARAEVGTG
51 YGGALLWQAN PYVGLALGYN GDISWSDDL SINGTKYDMD MDNKLAYLNA
101 EIRPWGASTN PWAQGLYVAA GAAYVDNQYD LTKNVGTNAS VEIDGNRFNG
151 GANGVSIAGN LKYDNDIAPY IGFGFAPKFS KNWGVFGEVG AYYSGNPKVS
201 LASNNDALIG SDGRTLKCTL DDQERKIAND DKYKWLPGK VGVNFIYW
    
```

Residue Number      Increasing Mass      Decreasing Mass

| Start - End      | Observed        | Mr(expt)         | Mr(calc)         | Delta         | Miss     | Sequence                    |                                   |
|------------------|-----------------|------------------|------------------|---------------|----------|-----------------------------|-----------------------------------|
| <b>163 - 178</b> | <b>894.4644</b> | <b>1786.9143</b> | <b>1786.8566</b> | <b>0.0577</b> | <b>0</b> | <b>K.YDNDIAPYIGFGFAPK.F</b> | ( <a href="#">Ions score 40</a> ) |

182 - 198 922.9743 1843.9341 1843.8530 0.0812 0 K.NWGVFGEV GAYYSGNPK.V ([Ions score 100](#))

Error: try setting browser cache to automatic.

Error: try setting browser cache to automatic.

---

LOCUS AAV80243 247 aa linear BCT 28-MAR-2005 DEFINITION carbapenem-associated resistance protein precursor [Acinetobacter baumannii]. ACCESSION AAV80243 VERSION AAV80243.1 GI:56131242 DBSOURCE accession [AY684798.1](#)  
 KEYWORDS . SOURCE Acinetobacter baumannii ORGANISM [Acinetobacter baumannii](#) Bacteria; Proteobacteria; Gammaproteobacteria; Pseudomonadales; Moraxellaceae; Acinetobacter; Acinetobacter calcoaceticus/baumannii complex. REFERENCE 1 (residues 1 to 247) AUTHORS Mussi,M.A., Limansky,A.S. and Viale,A.M. TITLE Acquisition of resistance to carbapenems in multidrug-resistant clinical strains of Acinetobacter baumannii: natural insertional inactivation of a gene encoding a member of a novel family of beta-barrel outer membrane proteins JOURNAL Antimicrob. Agents Chemother. 49 (4), 1432-1440 (2005) PUBMED [15793123](#)  
 REFERENCE 2 (residues 1 to 247) AUTHORS Mussi,M.A., Limansky,A.S. and Viale,A.M. TITLE Direct Submission JOURNAL Submitted (13-JUL-2004) Microbiology, IBR, Suipacha 531, Rosario, Santa Fe 2000, Argentina COMMENT Method: conceptual translation supplied by author. FEATURES Location/Qualifiers source 1..247 / organism="Acinetobacter baumannii" /isolate="Ab244" /db\_xref="taxon:[470](#)" [Protein](#) 1..247 / product="carbapenem-associated resistance protein precursor" /name="outer membrane protein" [sig peptide](#) 1..21 [mat peptide](#) 22..247 /product="carbapenem-associated resistance protein" [CDS](#) 1..247 /gene="carO" / coded\_by="AY684798.1:2134..2877" /note="associated with carbapenem resistance; heat-modifiable protein" / transl\_table=[11](#)

**Mascot:** <http://www.matrixscience.com/>

# Mascot Search Results

## Protein View

Match to: **gi|126641429** Score: **75**  
**surface antigen [Acinetobacter baumannii ATCC 17978]**  
 Found in search of C:\Temp\mas67.tmp

Nominal mass ( $M_r$ ): **11318**; Calculated pI value: **4.77**

NCBI BLAST search of [gi|126641429](#) against nr  
 Unformatted [sequence string](#) for pasting into other applications

Taxonomy: [Acinetobacter baumannii ATCC 17978](#)

Fixed modifications: Carbamidomethyl (C)  
 Variable modifications: Oxidation (M)  
 Cleavage by Trypsin: cuts C-term side of KR unless next residue is P  
 Sequence Coverage: **11%**

Matched peptides shown in **Bold Red**

**1** MVAGDHNYSR SRWRESYLTR PYYQEAQLTT PDLDYDR**DFS AAYELGHRAR**  
**51** SESKEGTQFE DMEGSLQQKW EELKAESRLK WEHAKQAIKD AWDDM

|           |             | Residue Number  |                  | Increasing Mass  |               | Decreasing Mass |                        |                                 |  |
|-----------|-------------|-----------------|------------------|------------------|---------------|-----------------|------------------------|---------------------------------|--|
| Start     | End         | Observed        | Mr(expt)         | Mr(calc)         | Delta         | Miss            | Sequence               |                                 |  |
| <b>38</b> | <b>- 48</b> | <b>633.3560</b> | <b>1264.6975</b> | <b>1264.5836</b> | <b>0.1139</b> | <b>0</b>        | <b>R.DFSAAYELGHR.A</b> | <a href="#">(Ions score 28)</a> |  |
| <b>38</b> | <b>- 48</b> | <b>633.3607</b> | <b>1264.7069</b> | <b>1264.5836</b> | <b>0.1233</b> | <b>0</b>        | <b>R.DFSAAYELGHR.A</b> | <a href="#">(Ions score 75)</a> |  |

Error: try setting browser cache to automatic.

Error: try setting browser cache to automatic.

---

LOCUS YP\_001084413 95 aa linear BCT 29-MAY-2010 DEFINITION surface antigen [Acinetobacter baumannii ATCC 17978]. ACCESSION YP\_001084413 VERSION YP\_001084413.1 GI:126641429 DBLINK Project: [58731](#) DBSOURCE REFSEQ: accession [NC\\_009085.1](#) KEYWORDS . SOURCE Acinetobacter baumannii ATCC 17978 ORGANISM [Acinetobacter baumannii ATCC 17978](#) Bacteria; Proteobacteria; Gammaproteobacteria; Pseudomonadales; Moraxellaceae; Acinetobacter; Acinetobacter calcoaceticus/baumannii complex. REFERENCE 1 (residues 1 to 95) AUTHORS Smith, M.G., Gianoulis, T.A., Pukatzki, S., Mekalanos, J.J., Ornston, L.N., Gerstein, M. and Snyder, M. TITLE New insights into Acinetobacter baumannii pathogenesis revealed by high-density pyrosequencing and transposon mutagenesis JOURNAL Genes Dev. 21 (5), 601-614 (2007) PUBMED [17344419](#) REFERENCE 2 (residues 1 to 95) CONSRTM NCBI Genome Project TITLE Direct Submission JOURNAL Submitted (05-MAR-2007) National Center for Biotechnology Information, NIH, Bethesda, MD 20894, USA REFERENCE 3 (residues 1 to 95) AUTHORS Smith, M.G., Gianoulis, T.A., Pukatzki, S., Mekalanos, J., Ornston, L.N., Gerstein, M. and Snyder, M. TITLE Direct Submission JOURNAL Submitted (27-NOV-2006) Department of Molecular, Cellular, and Developmental Biology, Yale University, 266 Whitney Ave, New Haven, CT 06520, USA COMMENT PROVISIONAL [REFSEQ](#): This record has not yet been subject to final NCBI review. The reference sequence was derived from [ABO11811](#). Source DNA and bacteria available from Michael Snyder (michael.snyder@yale.edu). Method: conceptual translation. FEATURES Location/Qualifiers source 1..95 /organism="Acinetobacter baumannii ATCC 17978" /strain="ATCC 17978" /db\_xref="ATCC:[17978](#)" /db\_xref="taxon:[400667](#)" [Protein](#) 1..95 /product="surface antigen" /calculated\_mol\_wt=11194 [CDS](#) 1..95 /locus\_tag="A1S\_1383" /coded\_by="complement (NC\_009085.1:1622740..1623027)" /transl\_table=[11](#) /db\_xref="GeneID:[4919934](#)"

Mascot: <http://www.matrixscience.com/>

# Mascot Search Results

## Protein View

Match to: **gi|126641429** Score: **69**  
**surface antigen [Acinetobacter baumannii ATCC 17978]**  
 Found in search of C:\Temp\mas71.tmp

Nominal mass ( $M_r$ ): **11318**; Calculated pI value: **4.77**

NCBI BLAST search of [gi|126641429](#) against nr  
 Unformatted [sequence string](#) for pasting into other applications

Taxonomy: [Acinetobacter baumannii ATCC 17978](#)

Fixed modifications: Carbamidomethyl (C)  
 Variable modifications: Oxidation (M)  
 Cleavage by Trypsin: cuts C-term side of KR unless next residue is P  
 Sequence Coverage: **24%**

Matched peptides shown in **Bold Red**

**1** MVAGDHNYS**D** SRW**ESYLTR** **PYYQEAQLTT** **PDLDYDR**DFS AAYELGHRAR  
**51** SESKEGTQFE DMEGSLQ**Q**KW EELKAESRLK WEHAKQAIKD AWDDM

|                    | Residue Number  | Increasing Mass  | Decreasing Mass  |               |             |                                                                        |
|--------------------|-----------------|------------------|------------------|---------------|-------------|------------------------------------------------------------------------|
| <b>Start - End</b> | <b>Observed</b> | <b>Mr(expt)</b>  | <b>Mr(calc)</b>  | <b>Delta</b>  | <b>Miss</b> | <b>Sequence</b>                                                        |
| <b>15 - 37</b>     | <b>946.8142</b> | <b>2837.4207</b> | <b>2836.3191</b> | <b>1.1016</b> | <b>0</b>    | <b>R.ESYLTRPYYQEAQLTTPDLDYDR.D</b> ( <a href="#">Ions score</a><br>69) |



Error: try setting browser cache to automatic.

Error: try setting browser cache to automatic.

---

LOCUS YP\_001084413 95 aa linear BCT 29-MAY-2010 DEFINITION surface antigen [Acinetobacter baumannii ATCC 17978]. ACCESSION YP\_001084413 VERSION YP\_001084413.1 GI:126641429 DBLINK Project: [58731](#) DBSOURCE REFSEQ: accession [NC\\_009085.1](#) KEYWORDS . SOURCE Acinetobacter baumannii ATCC 17978 ORGANISM [Acinetobacter baumannii ATCC 17978](#) Bacteria; Proteobacteria; Gammaproteobacteria; Pseudomonadales; Moraxellaceae; Acinetobacter; Acinetobacter calcoaceticus/baumannii complex. REFERENCE 1 (residues 1 to 95) AUTHORS Smith, M.G., Gianoulis, T.A., Pukatzki, S., Mekalanos, J.J., Ornston, L.N., Gerstein, M. and Snyder, M. TITLE New insights into Acinetobacter baumannii pathogenesis revealed by high-density pyrosequencing and transposon mutagenesis JOURNAL Genes Dev. 21 (5), 601-614 (2007) PUBMED [17344419](#) REFERENCE 2 (residues 1 to 95) CONSRTM NCBI Genome Project TITLE Direct Submission JOURNAL Submitted (05-MAR-2007) National Center for Biotechnology Information, NIH, Bethesda, MD 20894, USA REFERENCE 3 (residues 1 to 95) AUTHORS Smith, M.G., Gianoulis, T.A., Pukatzki, S., Mekalanos, J., Ornston, L.N., Gerstein, M. and Snyder, M. TITLE Direct Submission JOURNAL Submitted (27-NOV-2006) Department of Molecular, Cellular, and Developmental Biology, Yale University, 266 Whitney Ave, New Haven, CT 06520, USA COMMENT PROVISIONAL [REFSEQ](#): This record has not yet been subject to final NCBI review. The reference sequence was derived from [ABO11811](#). Source DNA and bacteria available from Michael Snyder (michael.snyder@yale.edu). Method: conceptual translation. FEATURES Location/Qualifiers source 1..95 /organism="Acinetobacter baumannii ATCC 17978" /strain="ATCC 17978" /db\_xref="ATCC:[17978](#)" /db\_xref="taxon:[400667](#)" [Protein](#) 1..95 /product="surface antigen" /calculated\_mol\_wt=11194 [CDS](#) 1..95 /locus\_tag="A1S\_1383" /coded\_by="complement (NC\_009085.1:1622740..1623027)" /transl\_table=[11](#) /db\_xref="GeneID:[4919934](#)"

Mascot: <http://www.matrixscience.com/>

# Mascot Search Results

## Protein View

Match to: **RRF\_ACIBS** Score: **75**

**Ribosome-recycling factor OS=Acinetobacter baumannii (strain SDF) GN=frr PE=3 SV=1**

Found in search of C:\Temp\mas5F.tmp

Nominal mass ( $M_r$ ): **20657**; Calculated pI value: **5.66**

NCBI BLAST search of [RRF\\_ACIBS](#) against nr

Unformatted [sequence string](#) for pasting into other applications

Taxonomy: [Acinetobacter baumannii SDF](#)

Fixed modifications: Carbamidomethyl (C)

Variable modifications: Oxidation (M)

Cleavage by Trypsin: cuts C-term side of KR unless next residue is P

Sequence Coverage: **8%**

Matched peptides shown in **Bold Red**

```

1 MINDLKKDSE QRMLKTLESL EQGFAKVRTG RAHPSILNGV MVPYYGSDVP
51 LNQVANVGVE DSRTLIVQPF ERTMVAAIDK AIRESDLGLN PITADSIRVP
101 LPALTEETRR DMQKIARSEA ENAKVAIRNI RRDVLGDIKA LLKEKEISED
151 DERRAGDDIQ KITDKYVAEV DKRLAAKEAE LMRV
    
```

|                    | Residue Number  | Increasing Mass  | Decreasing Mass  |               |             |                                                              |
|--------------------|-----------------|------------------|------------------|---------------|-------------|--------------------------------------------------------------|
| <b>Start - End</b> | <b>Observed</b> | <b>Mr(expt)</b>  | <b>Mr(calc)</b>  | <b>Delta</b>  | <b>Miss</b> | <b>Sequence</b>                                              |
| <b>84 - 98</b>     | <b>801.4292</b> | <b>1600.8438</b> | <b>1599.8104</b> | <b>1.0334</b> | <b>0</b>    | <b>R.ESDLGLNPITADSIR.V</b> ( <a href="#">Ions score 75</a> ) |

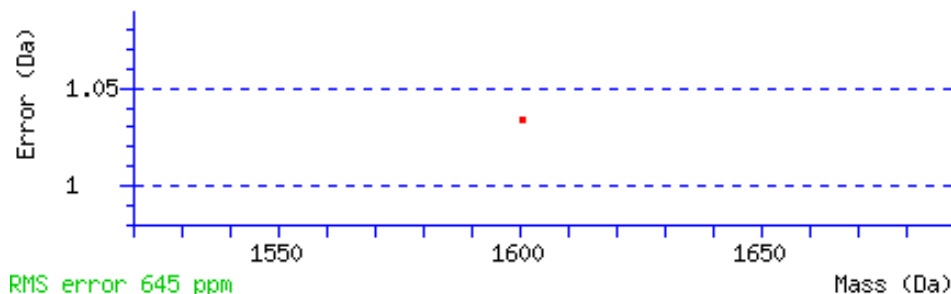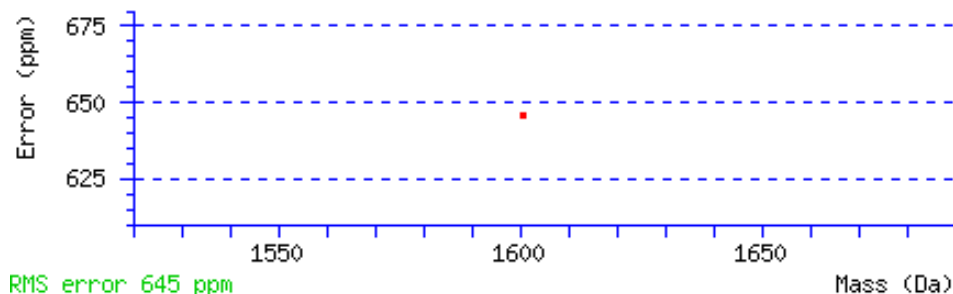

AC B0VMU5; DT 24-MAR-2009, integrated into UniProtKB/Swiss-Prot. DT 08-APR-2008, sequence version 1. DT 27-JUL-2011, entry version 26. DE RecName: Full=Ribosome-recycling factor; DE Short=RRF; DE AltName: Full=Ribosome-releasing factor; GN Name=frr; OrderedLocusNames=ABSDF1681; OS Acinetobacter baumannii (strain SDF). OC Bacteria; Proteobacteria; Gammaproteobacteria; Pseudomonadales; OC Moraxellaceae; Acinetobacter; OC Acinetobacter calcoaceticus/baumannii complex. OX NCBI\_TaxID=509170; RN [1] RP NUCLEOTIDE SEQUENCE [LARGE SCALE GENOMIC DNA]. RC STRAIN=SDF; RX PubMed=18350144; DOI=10.1371/journal.pone.0001805; RA Vallenet D., Nordmann P., Barbe V., Poirel L., Mangenot S., RA Bataille E., Dossat C., Gas S., Kreimeyer A., Lenoble P., Oztas S., RA Poulain J., Segurens B., Robert C., Abergel C., Claverie J.-M., RA Raoult D., Medigue C., Weissenbach J., Cruveiller S.; RT "Comparative analysis of Acinetobacters: three genomes for three RT lifestyles."; RL PLoS ONE 3:E1805-E1805(2008). CC -!- FUNCTION: Responsible for the release of ribosomes from messenger CC RNA at the termination of protein biosynthesis. May increase the CC efficiency of translation by recycling ribosomes from one round of CC translation to another (By similarity). CC -!- SUBCELLULAR LOCATION: Cytoplasm (By similarity). CC -!- SIMILARITY: Belongs to the RRF family. CC ----- CC Copyrighted by the UniProt Consortium, see <http://www.uniprot.org/terms> CC Distributed under the Creative Commons Attribution-NoDerivs License CC ----- DR EMBL; CU468230; CAP01021.1; -; Genomic\_DNA. DR RefSeq; YP\_001707066.1; NC\_010400.1. DR ProteinModelPortal; B0VMU5; -. DR SMR; B0VMU5; 1-184. DR STRING; B0VMU5; -. DR GeneID; 5987239; -. DR GenomeReviews; CU468230\_GR; ABSDF1681. DR KEGG; abm:ABSDF1681; -. DR HOGENOM; HBG533975; -. DR OMA; YYGAETP; -. DR ProtClustDB; PRK00083; -. DR GO; GO:0005737; C:cytoplasm; IEA:UniProtKB-SubCell. DR GO; GO:0006412; P: translation; IEA:UniProtKB-KW. DR HAMAP; MF\_00040; RRF; 1; -. DR InterPro; IPR002661; Ribosome\_recyc\_fac. DR InterPro; IPR023584; Ribosome\_recyc\_fac\_dom. DR PANTHER; PTHR20982; Ribosome\_recyc\_fac; 1. DR Pfam; PF01765; RRF; 1. DR SUPFAM; SSF55194; Ribosome\_recyc\_fac; 1. DR TIGRFAMs; TIGR00496; Frr; 1. PE 3: Inferred from homology; KW Complete proteome; Cytoplasm; Protein biosynthesis. FT CHAIN 1 184 Ribosome-recycling factor. FT /FTId=PRO\_1000090697. SQ SEQUENCE 184 AA; 20670 MW; 9D0B73BC15759FC7 CRC64; MINDLKKDSE QRMLKTLESL EQGFAKVRTG RAHPSILNGV MVPYYGSDVP LNQVANVGVE DSRTLIVQPF ERTMVA AIDK AIRES DLGLN PITADSIRVP LPALTEETRR DMQKIARSEA ENAKVAIRNI RRDVLGDIKA LLKEKEISED DERRAGDDIQ KITDKYVAEV DKRLAAKEAE LMRV

Mascot: <http://www.matrixscience.com/>

# Mascot Search Results

## Protein View

Match to: **gi|239500971** Score: **53**  
**Outer membrane protein W [Acinetobacter baumannii AB900]**  
 Found in search of C:\Temp\mas79.tmp

Nominal mass ( $M_r$ ): **21239**; Calculated pI value: **5.56**

NCBI BLAST search of [gi|239500971](#) against nr  
 Unformatted [sequence string](#) for pasting into other applications

Taxonomy: [Acinetobacter baumannii AB900](#)

Fixed modifications: Carbamidomethyl (C)  
 Variable modifications: Oxidation (M)  
 Cleavage by Trypsin: cuts C-term side of KR unless next residue is P  
 Sequence Coverage: **10%**

Matched peptides shown in **Bold Red**

```

1 MFKKVLVVAL MGVSSFTFAG NWQVKFGGSV IAPSEDTTTP LGVVKADHEY
51 AFTPSVEYFF GQSPFSAELL LATPINHDVL LDGQKVARIK QLPPTITAKY
101 HFKNSTRFTP YIGIGATAFI PWDEQGVADK VKEDFGVAGQ VGFNFQPADA
151 KNWGVFVDVR YADISPEVTL TNGAKFDLDI NPFVYTLGYS YKF
    
```

| Start - End | Observed | Mr(expt)  | Mr(calc)  | Delta  | Miss | Sequence                                                           |
|-------------|----------|-----------|-----------|--------|------|--------------------------------------------------------------------|
| 26 - 45     | 988.0298 | 1974.0451 | 1974.0310 | 0.0140 | 0    | <b>K.FGGSVIAPSEDTTTP</b> LGVVK.A ( <a href="#">Ions score 53</a> ) |

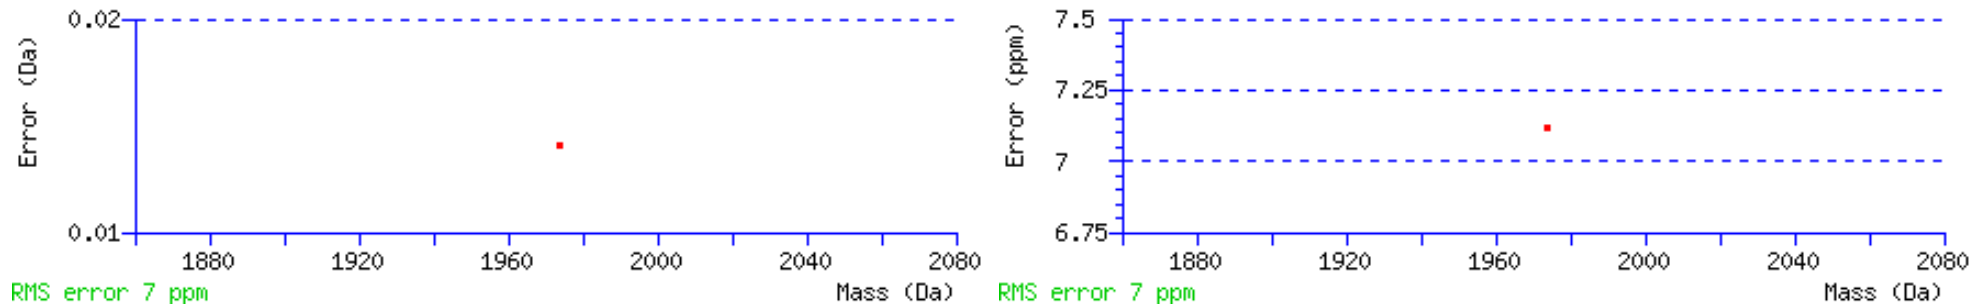

LOCUS ZP\_04660281 193 aa linear BCT 10-DEC-2010 DEFINITION Outer membrane protein W [Acinetobacter baumannii AB900]. ACCESSION ZP\_04660281 VERSION ZP\_04660281.1 GI:239500971 DBSOURCE REFSEQ: accession [NZ\\_ABXK01000001.1](#) KEYWORDS . SOURCE Acinetobacter baumannii AB900 ORGANISM [Acinetobacter baumannii AB900](#) Bacteria; Proteobacteria; Gammaproteobacteria; Pseudomonadales; Moraxellaceae; Acinetobacter; Acinetobacter calcoaceticus/baumannii complex. COMMENT WGS [REFSEQ](#): This record is provided to represent a collection of whole genome shotgun sequences. The reference sequence was derived from [ABXK01000001](#). Method: conceptual translation. FEATURES Location/Qualifiers source 1..193 /organism="Acinetobacter baumannii AB900" /strain="AB900" /db\_xref="taxon:[557601](#)" [Protein](#) 1..193 /product="Outer membrane protein W" /calculated\_mol\_wt=21121 [Region](#) 19..193 /region\_name="Surface\_Ag\_2" /note="Surface antigen; cl01155" /db\_xref="CDD:[198629](#)" [CDS](#) 1..193 /locus\_tag="AbauAB\_010100001530" /coded\_by="complement (NZ\_ABXK01000001.1:331995..332576)" /note="COG3047 Outer membrane protein W" /transl\_table=[11](#) /db\_xref="CDD:[112722](#)"

**Mascot:** <http://www.matrixscience.com/>
