# Supplementary material for: Comparative Proteomics of Inner Membrane Fraction from Carbapenem-Resistant Acinetobacter baumannii with a Reference Strain
Source: PubMed Central journal article supplement (PMC3383706; doi:10.1371/journal.pone.0039451), 2012-06-26
Supplement: pone.0039451.s005.pdf [file pone.0039451.s005.pdf]

**Table S1. Identification of differentially expressed proteins in inner membrane fraction of *Acinetobacter baumannii* intermediate resistant strain, RS122 with reference to ATCC 19606. Differential expression is shown as fold change (minimum 2 fold, p-value e0.05)**

| Master No. | Fold change | Mw kDa | pI   | Identification protein                                       | Score | Functions                                                                                                           |
|------------|-------------|--------|------|--------------------------------------------------------------|-------|---------------------------------------------------------------------------------------------------------------------|
| 510        | 2.98        | 19.4   | 4.98 | ATP synthase subunit delta of <i>Acinetobacter baumannii</i> | 194   | Subunit delta does not bear the catalytic high-affinity ATP-binding sites but require for function of ATP Synthase. |
| 620        | 2.95        | 18.6   | 5.72 | DNA protection during starvation protein                     | 166   | It protects DNA from oxidative damage by sequestering intracellular Fe <sup>2+</sup> ion.                           |
