# Supplementary material for: Comparative Proteomics of Inner Membrane Fraction from Carbapenem-Resistant Acinetobacter baumannii with a Reference Strain
Source: PubMed Central journal article supplement (PMC3383706; doi:10.1371/journal.pone.0039451), 2012-06-26
Supplement: pone.0039451.s006.pdf [file pone.0039451.s006.pdf]

**Table S2. Identification of differentially expressed proteins in inner membrane fraction of *Acinetobacter baumannii* low resistant strain, RS259 with reference to ATCC 19606. Differential expression is shown as fold change (minimum 2 fold, p-value  $\leq 0.05$ ).**

| Master No. | Fold change | Mw kDa | pI   | Identification and Accession No.                                                            | Score | Role in Resistance                                                                                       |
|------------|-------------|--------|------|---------------------------------------------------------------------------------------------|-------|----------------------------------------------------------------------------------------------------------|
| 806        | 3.05        | 43.1   | 5.21 | Elongation factor Tu<br>OS=Acinetobacter baumannii,<br>EFTU_ACIBT                           | 74    | Associated with efficient translation.                                                                   |
| 1003       | 3.01        | 51.5   | 5.43 | 3-isopropyl malate dehydratase<br>large subunit<br>OS=Acinetobacter baumannii<br>LEUC_ACIBT | 40    | Involved in amino-acid biosynthesis,<br>branched-chain amino acid<br>biosynthesis, leucine biosynthesis. |
